# Supplementary material for: Prenatal particulate matter exposure imprints an epigenetic scar on FCER1G in fetal macrophages, reemerging in M2 macrophages to drive atopic dermatitis development
Source: Research Square preprint supplement (doi:10.21203/rs.3.rs-6318574/v1), 2025-05-07
Supplement: Supplementary file 2 [file 47850c09a1d01b1b0fe29642.xlsx]

## Sheet: Table 3
Supplementary Table 3. Characteristics of the subjects from the four groups in the cord blood-based omics study
	Low PM2.5- healthy	Low PM2.5-	High PM2.5- healthy	High PM2.5-	p-value
		AD		AD
Sex (Male), n (%)	6 / 12 (50.0%)	9/ 12 (75.0%)	6 / 12 (50.0%)	7 / 10 (70.0%)	0.467
Maternal education level, n (%)
≤ Graduated high school	0 / 12	0 / 12	1 / 12 (8.3%)	0 / 10	0.714
Graduated college	10 / 12 (83.3%)	10 / 12 (83.3%)	9/ 12 (75.0%)	7 / 10 (70.0%)
≥ Graduated postgraduate school	2 / 12 (16.7%)	2 / 12 (16.7%)	2 / 12 (16.7%)	3 / 10 (30.0%)
Parental history of allergic disease, n (%)	6 / 12 (50.0%)	11 / 12 (91.7%)	6 / 12 (50.0%)	7 / 10 (70.0%)	0.1
Maternal exposure to environmental tobacco smoke during pregnancy, n (%)	8/ 12 (66.7%)	5 / 12 (41.7%)	4/ 12 (33.3%)	4 / 10 (40.0%)	0.396
Maternal age at delivery	34.58 ± 4.06	34.17 ± 3.64	33.00 ± 4.95	33.10 ± 2.18	0.885
PM10 during entire pregnancy	20.25 ± 1.95	21.85 ± 2.83	31.34 ± 5.01	29.36 ± 6.19	0
PM10 during 1st trimester	17.31 ± 2.09	18.40 ± 3.07	35.69 ± 3.79	33.02 ± 4.69	0
PM10 during 2nd trimester	18.86 ± 3.59	21.36 ± 4.00	31.69 ± 8.01	28.36 ± 8.15	0
Cord blood total IgE	0.37 ± 0.47	0.37 ± 0.41	0.24 ± 0.17	0.56 ± 0.85	0.686
1y total IgE	144.68 ± 415.06	108.91 ± 158.69	48.79 ± 46.20	132.47 ± 194.83	0.228
3y total IgE	36.62 ± 43.15	116.99 ± 177.49	109.76 ± 172.55	93.52 ± 81.51	0.465
