# Supplementary material for: Prenatal particulate matter exposure imprints an epigenetic scar on FCER1G in fetal macrophages, reemerging in M2 macrophages to drive atopic dermatitis development
Source: Research Square preprint supplement (doi:10.21203/rs.3.rs-6318574/v1), 2025-05-07
Supplement: Supplementary file 3 [file 673b65165f6d3b4ec521df1a.xlsx]

## Sheet: Table 2
Supplementary Table 2. Characteristics of the subjects from the four groups in the placenta-based omics study
	Low PM2.5- healthy	Low PM2.5-	High PM2.5- healthy	High PM2.5-	p-value
		AD		AD
Sex (Male), n (%)	6 / 12 (50.0%)	6 / 12 (50.0%)	6 / 12 (50.0%)	6 / 12 (50.0%)	1
Maternal education level, n (%)
≤ Graduated high school	0 / 12	0 / 12	0 / 12	0 / 12	1
Graduated college	10 / 12 (83.3%)	10 / 12 (83.3%)	10 / 12 (83.3%)	10 / 12 (83.3%)
≥ Graduated postgraduate school	2 / 12 (16.7%)	2 / 12 (16.7%)	2 / 12 (16.7%)	2 / 12 (16.7%)
Parental history of allergic disease, n (%)	6 / 12 (50.0%)	10 / 12 (83.3%)	5 / 12 (41.7%)	7 / 12 (58.3%)	0.187
Maternal exposure to environmental tobacco smoke during pregnancy, n (%)	8/ 12 (66.7%)	3/ 12 (25.0%)	4/ 12 (33.3%)	5 / 12 (41.7%)	0.218
Maternal age at delivery	34.58 ± 4.06	33.75 ±3.28	33.50 ± 4.34	32.08 ± 2.88	0.632
PM10 during entire pregnancy	20.25 ± 1.95	22.01 ± 2.41	31.46 ± 5.16	31.14 ± 6.05	0
PM10 during 1st trimester	17.31 ± 2.09	18.74 ± 3.31	35.14 ± 4.06	34.25 ± 4.81	0
PM10 during 2nd trimester	18.86 ± 3.59	21.46 ± 3.45	31.84 ± 8.20	31.85 ± 8.48	0
Cord blood total IgE	0.37 ± 0.47	0.23 ± 0.25	0.33 ± 0.45	0.58 ± 0.82	0.523
1y total IgE	144.68 ± 415.06	46.45 ± 36.24	47.40 ± 46.27	134.00 ± 181.20	0.321
3y total IgE	36.62 ± 43.15	41.54 ± 54.42	103.96 ± 162.34	107.37 ± 100.90	0.279
