# Supplementary material for: Prenatal particulate matter exposure imprints an epigenetic scar on FCER1G in fetal macrophages, reemerging in M2 macrophages to drive atopic dermatitis development
Source: Research Square preprint supplement (doi:10.21203/rs.3.rs-6318574/v1), 2025-05-07
Supplement: Supplementary file 4 [file 6fc1c16b09bde22001624369.xlsx]

## Sheet: DMC list
Supplementary Table 4. The list of differentially methylated CpG sites and differentially expressed genes in the placenta
	P values High PM AD vs High PM healthy	statistic High PM AD vs High PM healthy	P values Low PM AD vs Low PM healthy	statistic Low PM AD vs Low PM healthy	P values with covariate analysis	P values c_sex	P values M_age	P values M_atopy
cg00000957	0.00182274	3.11769	0.686106	0.404145	0.00176938	0.340392	0.47722	0.332176
cg00003529	0.0179263	2.36714	0.729034	-0.34641	0.0202598	0.595412	0.299357	0.730876
cg00003994	0.0326634	-2.1362	0.686106	0.404145	0.036812	0.681336	0.555539	0.377314
cg00005325	0.00665673	-2.71355	0.729034	0.34641	0.00548075	0.326023	0.851716	0.265034
cg00006198	0.0496472	1.96299	0.355611	-0.92376	0.0417887	0.995692	0.770897	0.367849
cg00006299	0.0326634	2.1362	0.386476	0.866025	0.034147	0.893072	0.409283	0.310113
cg00007644	0.0496472	1.96299	0.86249	0.173205	0.0278325	0.960572	0.427309	0.434434
cg00009834	0.00937477	2.59808	0.603332	-0.519615	0.00768442	0.914664	0.458948	0.676293
cg00013302	0.0433081	-2.02073	0.95396	0.057735	0.0441775	0.918435	0.264122	0.761465
cg00014998	0.0433081	-2.02073	0.0567468	-1.90526	0.0447609	0.87375	0.966214	0.422215
cg00015383	0.00937477	2.59808	0.603332	-0.519615	0.0193829	0.973648	0.815791	0.32098
cg00017931	0.00665673	-2.71355	0.729034	0.34641	0.0433155	0.87813	0.837698	0.483042
cg00025278	0.00466913	2.82902	0.908073	-0.11547	0.0482685	0.956313	0.5329	0.625977
cg00026141	0.00389242	2.88675	0.77283	0.288675	0.00901969	0.790939	0.481431	0.958496
cg00026776	0.0153138	2.42487	0.0734883	1.78979	0.0300878	0.668054	0.590531	0.413286
cg00028014	0.0496472	1.96299	0.603332	-0.519615	0.0201132	0.727612	0.936387	0.12708
cg00028935	0.0433081	-2.02073	0.386476	0.866025	0.0485474	0.615802	0.587644	0.932425
cg00029031	0.0326634	2.1362	0.77283	-0.288675	0.0310036	0.617127	0.142786	0.943311
cg00029678	0.00937477	2.59808	0.729034	-0.34641	0.0240412	0.604006	0.462242	0.608277
cg00030627	0.0282404	2.19393	0.204024	-1.27017	0.0182259	0.646798	0.288967	0.757215
cg00035389	0.0326634	-2.1362	0.525373	-0.635085	0.0368737	0.475045	0.606379	0.591939
cg00035630	0.0376669	2.07846	0.0734883	-1.78979	0.030941	0.887745	0.213408	0.860762
cg00035877	0.00122428	3.23316	0.298698	-1.03923	0.0153513	0.861254	0.656881	0.947967
cg00037755	0.0282404	2.19393	0.525373	-0.635085	0.0257876	0.76442	0.463376	0.762642
cg00038681	0.0179263	2.36714	0.817361	-0.23094	0.0384947	0.750518	0.210891	0.828247
cg00040566	0.0376669	2.07846	0.644167	-0.46188	0.0155117	0.20974	0.106753	0.257295
cg00040781	0.0282404	2.19393	0.729034	-0.34641	0.0328774	0.379365	0.339258	0.580666
cg00045164	0.0282404	-2.19393	0.355611	0.92376	0.041442	0.605646	0.75325	0.882545
cg00047443	0.0496472	1.96299	0.77283	-0.288675	0.0184302	0.195489	0.35519	0.172528
cg00050133	0.0282404	2.19393	0.225346	1.21244	0.0259133	0.693979	0.662665	0.451704
cg00052459	0.0243434	2.25167	0.86249	-0.173205	0.0196295	0.234621	0.494578	0.598185
cg00053063	0.0179263	2.36714	0.355611	-0.92376	0.015494	0.614328	0.772926	0.255966
cg00053361	0.00122428	3.23316	0.165857	1.38564	0.00573802	0.898439	0.4313	0.494085
cg00053839	0.0282404	2.19393	0.817361	-0.23094	0.0227737	0.245233	0.844129	0.670681
cg00055528	0.0179263	2.36714	0.298698	1.03923	0.0225761	0.65804	0.811776	0.601961
cg00055529	0.0433081	2.02073	0.686106	-0.404145	0.025905	0.977393	0.483804	0.418304
cg00056002	0.0376669	2.07846	0.418923	-0.80829	0.042558	0.984363	0.308825	0.783317
cg00057272	0.0326634	2.1362	0.386476	-0.866025	0.0139041	0.812377	0.107106	0.315482
cg00058887	0.0209213	2.3094	0.603332	-0.519615	0.049042	0.63274	0.404841	0.691357
cg00059232	0.00937477	2.59808	0.386476	-0.866025	0.0112473	0.964417	0.394289	0.509704
cg00059625	0.0179263	-2.36714	1	0	0.0313553	0.763847	0.940334	0.418315
cg00059662	0.0153138	2.42487	0.0646717	-1.84752	0.00748627	0.685768	0.650913	0.278009
cg00060800	0.0376669	-2.07846	0.729034	-0.34641	0.0444765	0.597242	0.901365	0.75472
cg00065419	0.0130425	2.48261	0.45292	-0.750555	0.00917765	0.441196	0.405142	0.609046
cg00069642	0.0433081	-2.02073	0.386476	0.866025	0.0446362	0.401323	0.932359	0.666176
cg00070940	0.0326634	2.1362	0.105969	-1.61658	0.0225074	0.865622	0.389197	0.653788
cg00071618	0.00558362	2.77128	0.248213	-1.1547	0.00911282	0.934128	0.392044	0.886238
cg00074354	0.0130425	2.48261	0.95396	-0.057735	0.00626832	0.284055	0.767378	0.514669
cg00077547	0.00268017	3.00222	0.563703	0.57735	0.00637003	0.729454	0.269263	0.497236
cg00080252	0.0433081	2.02073	0.603332	-0.519615	0.0355234	0.493688	0.458563	0.60242
cg00080418	0.0376669	2.07846	0.165857	-1.38564	0.0243963	0.819791	0.611245	0.292077
cg00082770	0.0110744	-2.54034	0.817361	0.23094	0.0276526	0.823098	0.336877	0.689519
cg00083359	0.0243434	-2.25167	0.105969	-1.61658	0.0176633	0.813794	0.295246	0.442962
cg00087274	0.0110744	2.54034	0.148915	-1.44338	0.0112257	0.668603	0.426224	0.417845
cg00087355	0.0496472	1.96299	0.105969	-1.61658	0.0363937	0.819484	0.376484	0.417862
cg00089219	0.0130425	2.48261	0.418923	0.80829	0.00735732	0.605261	0.806384	0.169506
cg00089356	0.0243434	2.25167	0.204024	1.27017	0.036034	0.704871	0.498219	0.846155
cg00090282	0.0376669	-2.07846	0.0646717	1.84752	0.0282647	0.584696	0.775264	0.257255
cg00090309	0.0209213	2.3094	0.298698	-1.03923	0.0397695	0.931289	0.277396	0.999501
cg00090813	0.00268017	3.00222	0.817361	-0.23094	0.00548382	0.918053	0.208212	0.589588
cg00098162	0.0496472	1.96299	0.644167	-0.46188	0.0223132	0.221059	0.282958	0.865649
cg00099069	0.00323491	2.94449	0.326348	-0.981495	0.00733644	0.68277	0.994186	0.820813
cg00101753	0.0179263	2.36714	0.525373	-0.635085	0.0207983	0.429935	0.399365	0.801676
cg00102327	0.0243434	2.25167	0.488422	-0.69282	0.0412376	0.582341	0.463199	0.659237
cg00106685	0.0376669	-2.07846	0.204024	-1.27017	0.0158955	0.699203	0.424442	0.609331
cg00108181	0.0496472	1.96299	0.644167	-0.46188	0.0309384	0.529816	0.383512	0.381639
cg00111823	0.0209213	2.3094	0.525373	-0.635085	0.0146031	0.599617	0.793647	0.28953
cg00111873	0.0496472	1.96299	0.686106	0.404145	0.0450467	0.560694	0.447619	0.984227
cg00111978	0.00389242	2.88675	0.0734883	1.78979	0.00462529	0.50891	0.760728	0.483251
cg00113127	0.00558362	2.77128	0.119033	1.55885	0.0482371	0.837352	0.656111	0.711052
cg00113225	0.0282404	2.19393	0.817361	0.23094	0.0293532	0.929937	0.350962	0.70082
cg00116418	0.0282404	-2.19393	0.563703	-0.57735	0.0227852	0.70991	0.879852	0.294031
cg00117294	0.0282404	2.19393	0.644167	-0.46188	0.0415728	0.966023	0.786101	0.576151
cg00118471	0.0326634	2.1362	0.77283	0.288675	0.0318349	0.535451	0.882463	0.541952
cg00120932	0.0326634	2.1362	0.355611	-0.92376	0.0203479	0.892884	0.205435	0.735643
cg00121551	0.0433081	2.02073	0.133327	-1.50111	0.00503146	0.862374	0.223604	0.172668
cg00126889	0.0376669	-2.07846	0.272656	1.09697	0.0447947	0.475739	0.58946	0.37237
cg00129466	0.00268017	3.00222	0.418923	-0.80829	0.0082219	0.827144	0.53748	0.895763
cg00132598	0.00182274	3.11769	0.817361	-0.23094	0.0124393	0.8308	0.65899	0.906836
cg00133448	0.0209213	2.3094	0.95396	0.057735	0.0345507	0.716882	0.548439	0.573159
cg00134032	0.0496472	1.96299	0.603332	0.519615	0.0320341	0.379246	0.106279	0.877914
cg00134289	0.0209213	2.3094	0.603332	0.519615	0.0479241	0.864716	0.507846	0.411216
cg00135157	0.00558362	2.77128	0.133327	1.50111	0.0172204	0.999853	0.940042	0.778858
cg00139681	0.00937477	2.59808	0.225346	1.21244	0.0203341	0.969963	0.585886	0.687589
cg00149455	0.0496472	1.96299	0.326348	-0.981495	0.00789467	0.831635	0.171629	0.449746
cg00150080	0.00665673	2.71355	0.686106	-0.404145	0.0159285	0.586858	0.441448	0.585425
cg00151234	0.0496472	-1.96299	0.817361	-0.23094	0.0447175	0.258407	0.55107	0.669639
cg00153082	0.0179263	2.36714	0.563703	-0.57735	0.0139608	0.663195	0.427183	0.936765
cg00155788	0.00937477	2.59808	0.105969	1.61658	0.00630012	0.766549	0.349572	0.196841
cg00156230	0.0433081	2.02073	0.525373	-0.635085	0.0302248	0.699424	0.485209	0.299659
cg00156633	0.0282404	2.19393	0.77283	-0.288675	0.029887	0.91058	0.495138	0.51888
cg00159987	0.0243434	2.25167	0.418923	-0.80829	0.0280579	0.647801	0.581966	0.632587
cg00161225	0.0153138	-2.42487	0.204024	1.27017	0.0312346	0.444791	0.954752	0.694115
cg00164189	0.0326634	-2.1362	0.729034	0.34641	0.0442132	0.575651	0.557461	0.880055
cg00164546	0.0282404	2.19393	0.225346	1.21244	0.01079	0.959357	0.170058	0.344699
cg00171942	0.0179263	2.36714	0.729034	0.34641	0.0283923	0.449951	0.843733	0.834629
cg00172249	0.0496472	1.96299	0.0940686	-1.67432	0.04077	0.905861	0.46425	0.240846
cg00172696	0.0376669	2.07846	0.355611	-0.92376	0.0446789	0.847547	0.405775	0.431704
cg00174508	0.0130425	2.48261	0.355611	-0.92376	0.0202364	0.586884	0.209651	0.670441
cg00175237	0.0433081	2.02073	0.95396	0.057735	0.0478429	0.603264	0.440706	0.447374
cg00175573	0.0130425	-2.48261	0.817361	-0.23094	0.0344078	0.60568	0.518455	0.716891
cg00177431	0.0179263	2.36714	0.817361	-0.23094	0.0330809	0.913623	0.441077	0.471368
cg00180806	0.0433081	-2.02073	0.563703	-0.57735	0.011359	0.600715	0.0851531	0.168272
cg00180930	0.0243434	2.25167	0.326348	-0.981495	0.0212574	0.388247	0.254002	0.738946
cg00184907	0.0282404	2.19393	0.563703	-0.57735	0.0237596	0.951214	0.432384	0.484891
cg00191369	0.0376669	-2.07846	0.86249	0.173205	0.0430632	0.501913	0.817465	0.458398
cg00192220	0.00466913	-2.82902	0.0832645	1.73205	0.00588873	0.557643	0.552126	0.463685
cg00193283	0.0433081	2.02073	0.686106	-0.404145	0.0247406	0.676788	0.189066	0.794004
cg00201968	0.0282404	-2.19393	0.729034	0.34641	0.0213322	0.966803	0.588822	0.261489
cg00202913	0.0110744	2.54034	0.644167	-0.46188	0.00725344	0.338406	0.138562	0.738377
cg00203456	0.00937477	-2.59808	0.686106	0.404145	0.0436196	0.456492	0.424319	0.742472
cg00203620	0.00466913	2.82902	0.326348	-0.981495	0.00319509	0.495018	0.185109	0.523811
cg00204262	0.00937477	2.59808	0.225346	-1.21244	0.00521953	0.73562	0.55495	0.382706
cg00204465	0.0110744	-2.54034	0.355611	-0.92376	0.0414398	0.571252	0.623954	0.380808
cg00205063	0.0376669	2.07846	0.225346	-1.21244	0.0251571	0.694186	0.895049	0.198599
cg00207965	0.00466913	-2.82902	0.908073	0.11547	0.0124337	0.914284	0.162654	0.813082
cg00209484	0.00389242	-2.88675	0.86249	-0.173205	0.0079655	0.518064	0.969546	0.289672
cg00209695	0.0179263	2.36714	0.133327	-1.50111	0.0453624	0.453844	0.216041	0.962433
cg00214044	0.0153138	-2.42487	0.563703	-0.57735	0.0135521	0.334632	0.187407	0.629048
cg00216549	0.0496472	1.96299	0.418923	-0.80829	0.0439034	0.896627	0.327733	0.531342
cg00219303	0.0376669	2.07846	0.298698	-1.03923	0.0119068	0.401493	0.410165	0.141859
cg00220737	0.0376669	2.07846	0.817361	0.23094	0.0146264	0.595606	0.159169	0.42702
cg00220845	0.00937477	-2.59808	0.45292	0.750555	0.00368769	0.321936	0.190769	0.468279
cg00222053	0.0496472	1.96299	0.817361	0.23094	0.0467317	0.550462	0.40404	0.794945
cg00222830	0.0326634	2.1362	0.326348	-0.981495	0.0281132	0.601118	0.420383	0.422061
cg00223043	0.0282404	2.19393	0.225346	1.21244	0.0438486	0.637022	0.357975	0.564731
cg00224496	0.0243434	-2.25167	0.165857	1.38564	0.0144481	0.761349	0.666303	0.117766
cg00230967	0.0110744	2.54034	0.644167	-0.46188	0.00754662	0.903325	0.74209	0.280492
cg00232160	0.00937477	2.59808	0.0567468	-1.90526	0.0475136	0.768468	0.356578	0.388838
cg00232827	0.00791179	2.65581	0.165857	-1.38564	0.0354168	0.658926	0.50119	0.894627
cg00232868	0.0326634	-2.1362	0.184209	1.32791	0.019772	0.385289	0.50383	0.625644
cg00233874	0.0326634	2.1362	0.225346	-1.21244	0.0362094	0.570894	0.479776	0.567766
cg00234625	0.0496472	-1.96299	0.563703	0.57735	0.00961837	0.126605	0.176393	0.761199
cg00234736	0.0179263	2.36714	0.729034	0.34641	0.028115	0.798425	0.640419	0.480699
cg00242098	0.0496472	1.96299	0.563703	0.57735	0.0486306	0.202654	0.917352	0.885887
cg00245050	0.0153138	2.42487	1	0	0.0234353	0.774458	0.376819	0.717043
cg00252027	0.0209213	2.3094	0.386476	0.866025	0.0261017	0.613536	0.973816	0.702987
cg00252804	0.0243434	2.25167	0.77283	-0.288675	0.0276843	0.682312	0.630429	0.53891
cg00254622	0.0130425	2.48261	0.204024	-1.27017	0.0144442	0.755087	0.475677	0.774895
cg00255573	0.0243434	2.25167	0.119033	1.55885	0.0421981	0.726814	0.445356	0.778833
cg00255919	0.0153138	-2.42487	0.686106	0.404145	0.0327768	0.678743	0.498601	0.667739
cg00256349	0.00791179	2.65581	0.603332	-0.519615	0.0231054	0.530504	0.344621	0.876341
cg00264799	0.0376669	2.07846	0.0832645	1.73205	0.0430298	0.521256	0.950983	0.266078
cg00265360	0.0209213	-2.3094	0.418923	0.80829	0.0034598	0.278716	0.195729	0.155438
cg00266619	0.0376669	2.07846	0.86249	-0.173205	0.0214351	0.902215	0.855535	0.236904
cg00269670	0.0326634	2.1362	0.77283	-0.288675	0.0477194	0.671244	0.542305	0.749244
cg00269767	0.0153138	2.42487	0.77283	-0.288675	0.0276822	0.840233	0.579778	0.77995
cg00275741	0.00466913	-2.82902	0.326348	0.981495	0.00131368	0.179286	0.934104	0.378069
cg00277753	0.0376669	2.07846	0.525373	-0.635085	0.0275774	0.882578	0.3134	0.801056
cg00281837	0.0433081	-2.02073	0.133327	1.50111	0.0472189	0.382303	0.849408	0.385534
cg00288376	0.0209213	2.3094	0.0940686	-1.67432	0.0135687	0.503694	0.257321	0.391054
cg00290483	0.00937477	-2.59808	0.603332	-0.519615	0.0349646	0.742734	0.64627	0.70548
cg00291366	0.0282404	2.19393	0.148915	-1.44338	0.0305911	0.943941	0.417871	0.415209
cg00291478	0.0433081	-2.02073	0.908073	-0.11547	0.0140759	0.205549	0.332382	0.218828
cg00297721	0.00323491	-2.94449	0.729034	0.34641	0.0062436	0.75523	0.453069	0.544716
cg00302312	0.00466913	2.82902	0.77283	-0.288675	0.00489852	0.801623	0.766399	0.209473
cg00303429	0.0209213	2.3094	0.0567468	-1.90526	0.047139	0.828638	0.943306	0.981739
cg00304631	0.0282404	-2.19393	0.248213	1.1547	0.042287	0.452199	0.786072	0.348227
cg00309313	0.0179263	-2.36714	0.525373	-0.635085	0.00443945	0.203959	0.33476	0.22318
cg00312746	0.0153138	2.42487	0.817361	-0.23094	0.011597	0.671089	0.68685	0.351275
cg00316875	0.0496472	-1.96299	0.86249	-0.173205	0.0405508	0.84417	0.160255	0.667069
cg00318737	0.0243434	2.25167	0.204024	-1.27017	0.0339621	0.58731	0.180159	0.783687
cg00320301	0.0179263	2.36714	0.86249	-0.173205	0.032957	0.880384	0.42723	0.71824
cg00325272	0.0243434	-2.25167	0.272656	-1.09697	0.0477691	0.833455	0.476348	0.760602
cg00325381	0.0153138	-2.42487	0.817361	0.23094	0.0369195	0.364326	0.415639	0.598823
cg00326690	0.00323491	2.94449	0.729034	-0.34641	0.0407642	0.611935	0.783361	0.731108
cg00328597	0.0243434	2.25167	0.488422	-0.69282	0.0401974	0.992545	0.26285	0.762466
cg00331677	0.0376669	2.07846	0.248213	-1.1547	0.0349445	0.679169	0.449863	0.507665
cg00332802	0.0243434	2.25167	0.603332	-0.519615	0.0498381	0.506847	0.195018	0.98901
cg00333870	0.00149616	3.17543	0.105969	-1.61658	0.00158986	0.974074	0.326292	0.967543
cg00335467	0.00665673	2.71355	0.817361	-0.23094	0.0350191	0.765314	0.522927	0.921117
cg00335818	0.0209213	2.3094	0.165857	-1.38564	0.0405272	0.807469	0.39622	0.78899
cg00343414	0.00323491	2.94449	0.729034	-0.34641	0.00320816	0.525892	0.593327	0.541116
cg00344494	0.0130425	2.48261	0.644167	-0.46188	0.00584202	0.323044	0.434201	0.550352
cg00344672	0.0110744	2.54034	0.95396	-0.057735	0.0282492	0.996899	0.889092	0.649656
cg00352417	0.0433081	-2.02073	0.272656	1.09697	0.0364185	0.424006	0.364995	0.435641
cg00352888	0.0243434	2.25167	0.563703	0.57735	0.0285852	0.874586	0.388692	0.760305
cg00353432	0.0179263	2.36714	0.86249	-0.173205	0.0152778	0.355766	0.26123	0.382713
cg00355275	0.0209213	-2.3094	0.77283	-0.288675	0.0118527	0.881392	0.799789	0.163889
cg00356183	0.0243434	-2.25167	0.77283	0.288675	0.0432959	0.784555	0.475552	0.626962
cg00359010	0.0130425	-2.48261	0.386476	-0.866025	0.0251388	0.300609	0.735875	0.62053
cg00360474	0.00665673	-2.71355	0.603332	0.519615	0.0100932	0.380957	0.948144	0.714
cg00360939	0.0243434	2.25167	0.77283	0.288675	0.0101694	0.425491	0.999127	0.155325
cg00366860	0.0496472	-1.96299	0.418923	0.80829	0.0122016	0.56522	0.202429	0.645905
cg00367721	0.0243434	-2.25167	0.272656	1.09697	0.0289718	0.723821	0.50832	0.618586
cg00370968	0.00791179	2.65581	0.729034	-0.34641	0.0302616	0.534037	0.262037	0.903063
cg00371770	0.00791179	2.65581	0.105969	-1.61658	0.00376214	0.258312	0.238696	0.767528
cg00372293	0.00466913	2.82902	0.729034	0.34641	0.0360707	0.877359	0.571307	0.622806
cg00374562	0.0179263	2.36714	0.563703	0.57735	0.0463656	0.900161	0.466769	0.546085
cg00379090	0.0376669	2.07846	0.644167	-0.46188	0.0267284	0.883211	0.462989	0.296494
cg00385761	0.0153138	-2.42487	0.326348	-0.981495	0.0301658	0.888723	0.473686	0.415038
cg00385769	0.0376669	-2.07846	0.686106	0.404145	0.0222191	0.487834	0.168555	0.562852
cg00387524	0.0326634	2.1362	0.603332	0.519615	0.0403029	0.956781	0.282769	0.925873
cg00388287	0.0433081	-2.02073	0.488422	-0.69282	0.0280982	0.781724	0.230811	0.485783
cg00388838	0.0130425	2.48261	0.908073	0.11547	0.012039	0.750172	0.347416	0.626107
cg00389406	0.0326634	2.1362	0.729034	-0.34641	0.0177764	0.507734	0.153899	0.489197
cg00389554	0.0376669	-2.07846	0.908073	0.11547	0.0464129	0.474406	0.319801	0.317721
cg00390215	0.0282404	-2.19393	0.817361	0.23094	0.0438398	0.641354	0.407328	0.650782
cg00394791	0.0243434	2.25167	0.77283	0.288675	0.0255545	0.650969	0.21035	0.720043
cg00395486	0.0153138	2.42487	0.686106	-0.404145	0.00317899	0.79214	0.14687	0.328999
cg00401032	0.00937477	2.59808	0.95396	0.057735	0.0419597	0.941086	0.689937	0.426665
cg00402956	0.0243434	2.25167	0.386476	-0.866025	0.0289723	0.707805	0.390062	0.59935
cg00407090	0.0326634	2.1362	0.298698	-1.03923	0.0443716	0.687377	0.439455	0.859415
cg00409049	0.00389242	-2.88675	0.133327	1.50111	0.00175964	0.574587	0.287395	0.195738
cg00411072	0.0376669	2.07846	0.563703	-0.57735	0.0351227	0.895303	0.186506	0.770395
cg00412609	0.0376669	-2.07846	0.298698	1.03923	0.023692	0.787237	0.332428	0.181947
cg00413089	0.00268017	3.00222	0.908073	-0.11547	0.00217197	0.672378	0.564102	0.681583
cg00413124	0.00937477	2.59808	0.326348	-0.981495	0.0108843	0.585478	0.28037	0.894948
cg00414785	0.0326634	2.1362	0.298698	1.03923	0.042831	0.766009	0.639127	0.496891
cg00415077	0.0433081	2.02073	0.563703	-0.57735	0.049253	0.705353	0.390854	0.531841
cg00416538	0.0243434	-2.25167	0.686106	0.404145	0.0494836	0.670725	0.432679	0.729949
cg00417071	0.0243434	2.25167	0.225346	-1.21244	0.0321601	0.643338	0.379393	0.973522
cg00417323	0.0243434	2.25167	0.45292	0.750555	0.0400995	0.722877	0.580602	0.291896
cg00420193	0.0433081	2.02073	0.184209	-1.32791	0.0396422	0.799343	0.521979	0.761217
cg00420566	0.0282404	-2.19393	0.355611	0.92376	0.0485166	0.925567	0.460536	0.427606
cg00421144	0.00791179	2.65581	0.95396	-0.057735	0.0181615	0.637915	0.341005	0.706955
cg00422971	0.0209213	-2.3094	0.908073	-0.11547	0.0104819	0.371831	0.495343	0.2592
cg00424166	0.0153138	2.42487	0.488422	-0.69282	0.025196	0.776443	0.357416	0.490411
cg00426382	0.0433081	-2.02073	0.525373	0.635085	0.0182807	0.838986	0.961724	0.163105
cg00428349	0.0496472	1.96299	0.488422	-0.69282	0.0114635	0.103161	0.51757	0.166673
cg00432262	0.00558362	2.77128	0.525373	0.635085	0.0114682	0.760248	0.713177	0.873132
cg00434575	0.0179263	2.36714	0.488422	-0.69282	0.00872406	0.293723	0.103274	0.800816
cg00434886	0.0282404	2.19393	0.817361	0.23094	0.0301658	0.683804	0.836489	0.331579
cg00437011	0.0209213	2.3094	0.563703	-0.57735	0.0272938	0.868282	0.249329	0.759142
cg00440232	0.0496472	1.96299	0.418923	-0.80829	0.0206457	0.356206	0.364967	0.285784
cg00440252	0.00665673	2.71355	0.355611	-0.92376	0.00741028	0.855644	0.588691	0.534193
cg00442570	0.0179263	2.36714	0.45292	-0.750555	0.0061515	0.835595	0.129182	0.394174
cg00444151	0.0326634	-2.1362	0.77283	0.288675	0.00915966	0.116554	0.173049	0.617713
cg00451486	0.00558362	2.77128	0.563703	0.57735	0.00646912	0.846365	0.70958	0.270486
cg00452177	0.0376669	2.07846	0.729034	-0.34641	0.00852799	0.142772	0.610486	0.165618
cg00453903	0.0209213	2.3094	0.644167	-0.46188	0.0485663	0.994217	0.726567	0.525081
cg00459218	0.000344158	3.57957	0.95396	0.057735	0.000719331	0.857062	0.428744	0.846345
cg00459898	0.0282404	2.19393	0.418923	-0.80829	0.0384996	0.428708	0.818102	0.47008
cg00460091	0.0209213	2.3094	0.165857	-1.38564	0.018028	0.257205	0.54909	0.494853
cg00460323	0.00937477	2.59808	1	0	0.0293583	0.440502	0.392254	0.848933
cg00460800	0.00665673	2.71355	0.386476	-0.866025	0.0351867	0.67903	0.53875	0.861682
cg00464796	0.0209213	2.3094	0.908073	0.11547	0.0249617	0.909042	0.353748	0.725046
cg00465079	0.0179263	2.36714	1	0	0.0318823	0.575297	0.897466	0.424967
cg00466136	0.0326634	-2.1362	0.77283	-0.288675	0.0286572	0.952426	0.518687	0.476926
cg00474004	0.0209213	2.3094	0.817361	0.23094	0.022119	0.876408	0.732986	0.384103
cg00479443	0.0110744	-2.54034	0.488422	0.69282	0.014686	0.938914	0.727966	0.243292
cg00480115	0.0496472	1.96299	0.45292	-0.750555	0.0251465	0.229979	0.251224	0.252365
cg00480383	0.00791179	2.65581	0.644167	-0.46188	0.0117202	0.835673	0.530213	0.829075
cg00481350	0.0243434	-2.25167	0.418923	-0.80829	0.030664	0.633618	0.454989	0.545635
cg00486352	0.0433081	-2.02073	0.418923	0.80829	0.0267914	0.649263	0.337041	0.669491
cg00491422	0.0153138	2.42487	0.644167	-0.46188	0.0163749	0.645153	0.627537	0.3465
cg00491428	0.00791179	2.65581	0.105969	-1.61658	0.0230597	0.975252	0.247977	0.791104
cg00493242	0.0282404	2.19393	0.95396	-0.057735	0.0336223	0.773098	0.79664	0.318328
cg00497735	0.00389242	2.88675	0.45292	0.750555	0.00406295	0.398449	0.277043	0.982107
cg00497905	0.0376669	-2.07846	0.105969	1.61658	0.0391698	0.633846	0.314661	0.538606
cg00499857	0.0110744	-2.54034	0.204024	1.27017	0.0323575	0.663881	0.348616	0.897973
cg00500047	0.0243434	2.25167	0.184209	1.32791	0.0273258	0.758191	0.605514	0.3759
cg00500564	0.0209213	-2.3094	0.418923	0.80829	0.0131042	0.862389	0.175345	0.918304
cg00502597	0.0110744	-2.54034	0.418923	0.80829	0.0138251	0.341925	0.46715	0.693644
cg00507899	0.0282404	-2.19393	0.86249	0.173205	0.0192684	0.692338	0.721605	0.444086
cg00513024	0.0209213	2.3094	0.817361	0.23094	0.0367297	0.983743	0.924404	0.86055
cg00514268	0.0130425	-2.48261	0.418923	-0.80829	0.0277268	0.912841	0.788356	0.484307
cg00514713	0.0433081	2.02073	0.326348	-0.981495	0.0174198	0.446137	0.165151	0.282726
cg00519537	0.0376669	2.07846	0.326348	-0.981495	0.0399783	0.48227	0.248568	0.652386
cg00520265	0.0243434	-2.25167	0.729034	0.34641	0.00150115	0.974407	0.0676163	0.0582953
cg00521221	0.0496472	1.96299	0.355611	-0.92376	0.0328447	0.845524	0.671061	0.441102
cg00521703	0.0282404	2.19393	0.165857	-1.38564	0.0248709	0.828399	0.425821	0.616421
cg00522561	0.0243434	-2.25167	0.45292	-0.750555	0.0439181	0.6216	0.881677	0.617379
cg00523474	0.0243434	2.25167	0.77283	0.288675	0.0257621	0.770441	0.277855	0.947796
cg00525772	0.0376669	2.07846	0.95396	0.057735	0.0385869	0.943847	0.589121	0.320643
cg00525931	0.00665673	2.71355	0.644167	0.46188	0.029403	0.922049	0.767387	0.978663
cg00526772	0.0179263	2.36714	0.525373	0.635085	0.0376936	0.6463	0.862596	0.3598
cg00527928	0.00937477	2.59808	0.77283	0.288675	0.0186685	0.767276	0.925055	0.644548
cg00531182	0.0326634	2.1362	0.355611	-0.92376	0.0337103	0.395698	0.974047	0.591323
cg00531877	0.0179263	2.36714	0.45292	0.750555	0.0359618	0.993661	0.547709	0.717975
cg00531926	0.0153138	-2.42487	0.225346	1.21244	0.0183347	0.420663	0.590974	0.548303
cg00532234	0.00558362	2.77128	0.563703	0.57735	0.0083306	0.818079	0.801315	0.391324
cg00532901	0.0376669	-2.07846	0.326348	0.981495	0.0462334	0.998315	0.304441	0.774977
cg00537837	0.00221369	3.05996	0.86249	0.173205	0.000184724	0.0926172	0.0570336	0.221186
cg00538212	0.0153138	2.42487	0.603332	-0.519615	0.0422289	0.654068	0.458491	0.870551
cg00538458	0.0282404	-2.19393	0.488422	-0.69282	0.0129257	0.827949	0.358568	0.159507
cg00538726	0.0130425	-2.48261	0.0646717	-1.84752	0.0116404	0.8596	0.974561	0.120489
cg00539572	0.0282404	2.19393	0.817361	-0.23094	0.0155866	0.152025	0.262327	0.593031
cg00539976	0.00182274	-3.11769	0.248213	1.1547	0.00832911	0.726286	0.654118	0.741276
cg00540819	0.0209213	2.3094	0.119033	-1.55885	0.0200959	0.608803	0.325112	0.589765
cg00543315	0.0496472	-1.96299	0.355611	0.92376	0.0252322	0.601982	0.156221	0.46492
cg00543869	0.0326634	2.1362	0.184209	-1.32791	0.019129	0.224723	0.560883	0.604581
cg00543906	0.0496472	1.96299	0.148915	-1.44338	0.0370035	0.925811	0.318471	0.635971
cg00544286	0.0243434	2.25167	0.686106	-0.404145	0.0312107	0.608612	0.259325	0.670324
cg00547558	0.00665673	2.71355	0.908073	-0.11547	0.0104295	0.79487	0.995975	0.132552
cg00548338	0.00466913	2.82902	0.525373	0.635085	0.00761111	0.46818	0.547041	0.692163
cg00550540	0.0326634	2.1362	0.355611	-0.92376	0.0397919	0.781078	0.46146	0.633174
cg00555085	0.0282404	-2.19393	0.45292	-0.750555	0.0382802	0.537525	0.487399	0.543477
cg00555675	0.00389242	2.88675	0.488422	-0.69282	0.000861491	0.187095	0.544393	0.191932
cg00556627	0.0179263	2.36714	0.45292	-0.750555	0.0173	0.625657	0.638365	0.344563
cg00557001	0.00937477	2.59808	0.908073	0.11547	0.0227519	0.973892	0.798169	0.591046
cg00557671	0.0376669	2.07846	0.86249	0.173205	0.0289984	0.867851	0.285454	0.638827
cg00559850	0.000998686	-3.2909	0.908073	-0.11547	0.00138329	0.19013	0.973773	0.457301
cg00561194	0.0243434	2.25167	0.0567468	-1.90526	0.0423921	0.736386	0.232708	0.357325
cg00564657	0.0496472	1.96299	0.603332	-0.519615	0.0238328	0.780373	0.260728	0.604093
cg00564737	0.0496472	-1.96299	0.0646717	-1.84752	0.049162	0.555802	0.390473	0.403028
cg00565113	0.00665673	-2.71355	0.686106	0.404145	0.0135405	0.227592	0.795373	0.626795
cg00565679	0.0243434	2.25167	0.817361	-0.23094	0.0346484	0.911925	0.36958	0.641931
cg00565786	0.0326634	2.1362	0.45292	0.750555	0.0257083	0.777091	0.138051	0.646143
cg00567043	0.0376669	2.07846	0.95396	-0.057735	0.0326216	0.988848	0.422126	0.51968
cg00568555	0.0326634	2.1362	0.686106	-0.404145	0.0129175	0.957697	0.15534	0.270399
cg00570498	0.0376669	2.07846	0.77283	-0.288675	0.0224488	0.409529	0.549876	0.238736
cg00571067	0.0243434	2.25167	0.908073	0.11547	0.0173346	0.931837	0.386217	0.303641
cg00572633	0.0243434	2.25167	1	0	0.00533188	0.709497	0.126153	0.699172
cg00576474	0.0153138	-2.42487	0.272656	-1.09697	0.0116693	0.469503	0.294919	0.482242
cg00581139	0.00665673	2.71355	0.729034	-0.34641	0.00394517	0.370858	0.534454	0.364585
cg00583147	0.0209213	2.3094	0.603332	0.519615	0.0364432	0.757448	0.772676	0.594075
cg00590481	0.0326634	2.1362	0.908073	0.11547	0.0466934	0.87641	0.767706	0.245224
cg00592046	0.0496472	-1.96299	0.817361	-0.23094	0.0130071	0.692025	0.10653	0.381532
cg00597107	0.0243434	2.25167	0.165857	-1.38564	0.048235	0.718293	0.351194	0.431589
cg00598013	0.0376669	-2.07846	0.729034	0.34641	0.0305011	0.582434	0.485992	0.227984
cg00601450	0.0282404	-2.19393	0.644167	-0.46188	0.0138092	0.501118	0.875142	0.189557
cg00602880	0.0282404	2.19393	0.603332	-0.519615	0.0262504	0.522856	0.819094	0.406945
cg00603274	0.0376669	-2.07846	0.272656	1.09697	0.0109211	0.14256	0.488075	0.630966
cg00604900	0.00558362	2.77128	0.45292	0.750555	0.0143865	0.981844	0.967093	0.821097
cg00604979	0.0376669	2.07846	0.86249	-0.173205	0.0343699	0.621107	0.634114	0.261626
cg00605001	0.0209213	-2.3094	0.0940686	-1.67432	0.0332247	0.997541	0.88847	0.27919
cg00613523	0.0326634	2.1362	0.686106	0.404145	0.0410238	0.61914	0.428693	0.506985
cg00615059	0.0326634	2.1362	0.488422	0.69282	0.0476797	0.859364	0.352206	0.874756
cg00623709	0.0326634	-2.1362	0.644167	0.46188	0.0492878	0.459108	0.328869	0.653608
cg00629382	0.0153138	-2.42487	0.603332	-0.519615	0.0190718	0.352796	0.519104	0.427747
cg00633274	0.0130425	2.48261	0.603332	0.519615	0.0118024	0.4421	0.285748	0.519787
cg00633413	0.0496472	1.96299	0.817361	-0.23094	0.0152018	0.563929	0.141518	0.839525
cg00635950	0.0179263	2.36714	0.77283	-0.288675	0.0397403	0.932429	0.660593	0.949016
cg00637940	0.00323491	2.94449	1	0	0.0052194	0.454351	0.209299	0.87442
cg00638344	0.00937477	2.59808	0.603332	-0.519615	0.00684802	0.594219	0.559607	0.454945
cg00640628	0.0282404	-2.19393	0.729034	0.34641	0.0096831	0.19697	0.672778	0.261025
cg00641105	0.0282404	2.19393	0.0567468	-1.90526	0.012927	0.566806	0.197174	0.411501
cg00641122	0.0282404	2.19393	0.204024	-1.27017	0.0204951	0.985633	0.404718	0.302865
cg00641437	0.0433081	-2.02073	0.95396	-0.057735	0.0222688	0.987326	0.504785	0.22386
cg00645241	0.0326634	2.1362	0.603332	-0.519615	0.0183522	0.69012	0.0919012	0.848348
cg00646615	0.0282404	2.19393	0.603332	0.519615	0.0466739	0.868531	0.83878	0.559634
cg00647859	0.0243434	2.25167	0.908073	-0.11547	0.0190806	0.816185	0.510705	0.426707
cg00650950	0.0496472	1.96299	0.817361	-0.23094	0.0488885	0.369595	0.734943	0.193961
cg00651359	0.0179263	2.36714	0.77283	-0.288675	0.0166894	0.576498	0.288893	0.56183
cg00651523	0.00937477	2.59808	0.603332	0.519615	0.00488843	0.965886	0.53003	0.139401
cg00653615	0.00558362	-2.77128	0.0734883	-1.78979	0.031365	0.917809	0.64033	0.818538
cg00655788	0.0179263	2.36714	0.908073	0.11547	0.0320449	0.847469	0.681232	0.401078
cg00657440	0.00791179	2.65581	0.133327	1.50111	0.0074871	0.392956	0.738689	0.6722
cg00660513	0.0179263	2.36714	0.355611	-0.92376	0.00324003	0.701326	0.23584	0.292715
cg00661735	0.0153138	2.42487	0.204024	-1.27017	0.0120104	0.588047	0.499582	0.795124
cg00661855	0.0282404	-2.19393	0.386476	0.866025	0.0173708	0.65566	0.216776	0.557344
cg00667343	0.00937477	2.59808	0.248213	-1.1547	0.00727674	0.437087	0.279271	0.474178
cg00669593	0.0209213	-2.3094	0.817361	0.23094	0.0246311	0.5042	0.360878	0.413076
cg00670166	0.0326634	2.1362	0.418923	-0.80829	0.0438806	0.826084	0.745795	0.46755
cg00674903	0.0496472	-1.96299	0.686106	0.404145	0.031722	0.303836	0.267305	0.680492
cg00675313	0.0153138	-2.42487	0.204024	-1.27017	0.00814291	0.832486	0.52347	0.194361
cg00675581	0.0282404	2.19393	0.204024	-1.27017	0.0379287	0.772818	0.472595	0.988608
cg00676304	0.0376669	2.07846	0.204024	-1.27017	0.0419171	0.638803	0.271345	0.612277
cg00677809	0.0130425	2.48261	0.298698	-1.03923	0.0257324	0.981185	0.705009	0.739768
cg00679603	0.0282404	2.19393	0.525373	-0.635085	0.0453001	0.949433	0.267793	0.842998
cg00683779	0.00268017	3.00222	0.184209	1.32791	0.00929895	0.980862	0.965766	0.892809
cg00685969	0.0179263	-2.36714	0.817361	0.23094	0.00803644	0.898329	0.325454	0.194138
cg00687621	0.0376669	-2.07846	0.298698	1.03923	0.0100954	0.385057	0.658491	0.212205
cg00691249	0.00791179	-2.65581	0.95396	0.057735	0.00636824	0.602523	0.213956	0.966913
cg00692367	0.0376669	2.07846	0.488422	0.69282	0.020895	0.734561	0.183704	0.207955
cg00693157	0.00665673	2.71355	0.45292	0.750555	0.0130533	0.871689	0.354398	0.981354
cg00695387	0.00268017	-3.00222	1	0	0.00230592	0.825263	0.66655	0.368717
cg00697057	0.0130425	2.48261	0.563703	-0.57735	0.00611514	0.194543	0.869495	0.326844
cg00697358	0.00937477	2.59808	1	0	0.0202807	0.69946	0.392338	0.513637
cg00698771	0.00937477	-2.59808	0.488422	-0.69282	0.0201008	0.977791	0.432461	0.764124
cg00701318	0.0209213	2.3094	0.298698	-1.03923	0.0195872	0.728921	0.346963	0.974429
cg00701872	0.0496472	1.96299	0.386476	-0.866025	0.0472433	0.548124	0.53585	0.439891
cg00704369	0.0376669	2.07846	0.204024	1.27017	0.0243017	0.316205	0.375447	0.375964
cg00705157	0.0496472	-1.96299	0.817361	0.23094	0.0130529	0.680475	0.285742	0.198296
cg00705507	0.00466913	2.82902	0.563703	-0.57735	0.0180308	0.979345	0.497539	0.889921
cg00706450	0.00937477	2.59808	0.418923	0.80829	0.0215903	0.677122	0.697586	0.854985
cg00707326	0.0433081	2.02073	0.488422	-0.69282	0.0226274	0.298556	0.713337	0.194555
cg00713567	0.00389242	-2.88675	0.355611	-0.92376	0.00809037	0.874297	0.7904	0.73098
cg00718336	0.0376669	2.07846	0.908073	0.11547	0.0477799	0.920814	0.671466	0.354182
cg00723939	0.0130425	2.48261	0.686106	-0.404145	0.0150953	0.877636	0.552606	0.393992
cg00725193	0.0243434	2.25167	0.165857	-1.38564	0.0279451	0.780031	0.486036	0.77459
cg00729103	0.0130425	2.48261	0.817361	0.23094	0.00476992	0.364822	0.41158	0.631237
cg00730441	0.0153138	-2.42487	0.644167	-0.46188	0.0158711	0.699878	0.841791	0.453362
cg00737655	0.0153138	2.42487	0.355611	-0.92376	0.0195867	0.792646	0.390655	0.480671
cg00738635	0.0179263	2.36714	0.488422	-0.69282	0.0480928	0.770425	0.301152	0.75895
cg00740870	0.0153138	-2.42487	0.248213	1.1547	0.026692	0.3316	0.58134	0.615413
cg00741609	0.0209213	-2.3094	0.563703	-0.57735	0.0172632	0.312036	0.929665	0.857616
cg00741945	0.00937477	2.59808	0.248213	-1.1547	0.0172194	0.511875	0.915003	0.994682
cg00743733	0.00791179	2.65581	0.272656	1.09697	0.0128106	0.800944	0.253408	0.593108
cg00744851	0.0496472	1.96299	0.563703	0.57735	0.041351	0.404947	0.26348	0.94082
cg00744898	0.0496472	-1.96299	0.95396	0.057735	0.0408182	0.841062	0.710296	0.701701
cg00746767	0.00466913	-2.82902	0.272656	1.09697	0.0385522	0.609558	0.434643	0.630308
cg00749969	0.0282404	-2.19393	0.105969	-1.61658	0.0171435	0.745456	0.625574	0.178515
cg00750875	0.0282404	2.19393	0.418923	-0.80829	0.0291435	0.758048	0.936862	0.385069
cg00750964	0.0326634	2.1362	1	0	0.0408491	0.608575	0.453332	0.782162
cg00751730	0.0282404	2.19393	0.77283	-0.288675	0.0271645	0.467755	0.180062	0.902924
cg00759373	0.0282404	2.19393	0.45292	-0.750555	0.013243	0.938032	0.274487	0.409543
cg00760574	0.0326634	-2.1362	0.77283	0.288675	0.0185803	0.398023	0.929448	0.138233
cg00762869	0.0243434	-2.25167	0.525373	0.635085	0.0321651	0.799368	0.584354	0.578866
cg00763510	0.00791179	2.65581	0.386476	-0.866025	0.00924181	0.712168	0.211538	0.606392
cg00764364	0.0326634	2.1362	0.386476	-0.866025	0.021338	0.515002	0.233698	0.750083
cg00765967	0.000138679	3.81051	0.326348	0.981495	3.72334e-05	0.871637	0.70333	0.458686
cg00767573	0.0282404	2.19393	0.272656	-1.09697	0.0361029	0.868456	0.206246	0.253498
cg00769470	0.0433081	2.02073	0.355611	-0.92376	0.0467641	0.907235	0.577478	0.594204
cg00771218	0.0209213	-2.3094	0.563703	-0.57735	0.0487441	0.812592	0.667594	0.583116
cg00771642	0.0326634	-2.1362	0.77283	-0.288675	0.0452843	0.581304	0.910876	0.576391
cg00772932	0.0110744	2.54034	0.225346	-1.21244	0.0403367	0.653334	0.576645	0.69152
cg00773698	0.00937477	-2.59808	0.248213	1.1547	0.00440097	0.465569	0.783431	0.268233
cg00776266	0.0179263	-2.36714	0.95396	-0.057735	0.0392113	0.930909	0.732589	0.454888
cg00777074	0.0433081	-2.02073	0.86249	0.173205	0.0467648	0.588326	0.473626	0.728835
cg00778086	0.0326634	-2.1362	0.298698	1.03923	0.00700321	0.0924873	0.454964	0.34049
cg00779167	0.0209213	2.3094	0.686106	-0.404145	0.0178123	0.379352	0.376316	0.720806
cg00779858	0.0153138	2.42487	0.86249	0.173205	0.0181363	0.834242	0.560703	0.567725
cg00780724	0.0433081	2.02073	0.563703	-0.57735	0.00744688	0.278095	0.189033	0.358115
cg00788130	0.0282404	2.19393	0.204024	-1.27017	0.0247821	0.931112	0.257193	0.360926
cg00789812	0.0282404	2.19393	0.525373	-0.635085	0.0409021	0.957179	0.662135	0.744563
cg00792011	0.0282404	2.19393	0.355611	-0.92376	0.0255193	0.585178	0.842137	0.302937
cg00794759	0.0282404	2.19393	0.272656	1.09697	0.0184241	0.22081	0.306472	0.848445
cg00796164	0.0110744	2.54034	0.86249	-0.173205	0.0258041	0.736128	0.979988	0.887333
cg00798232	0.0179263	2.36714	0.95396	0.057735	0.0412137	0.633739	0.410353	0.587971
cg00799060	0.0433081	2.02073	0.184209	-1.32791	0.0457612	0.725755	0.315232	0.793641
cg00801571	0.0243434	2.25167	0.184209	-1.32791	0.0303218	0.626022	0.864193	0.325297
cg00802855	0.0179263	2.36714	0.355611	-0.92376	0.0490921	0.862508	0.658721	0.731599
cg00806727	0.0153138	2.42487	0.563703	-0.57735	0.00796681	0.22306	0.829219	0.331812
cg00807608	0.00268017	3.00222	0.95396	-0.057735	0.00458856	0.517835	0.926813	0.592924
cg00807769	0.0326634	2.1362	0.603332	-0.519615	0.0326933	0.446613	0.609192	0.425219
cg00808196	0.000174887	3.75278	0.418923	-0.80829	0.000152564	0.882575	0.996121	0.846744
cg00808502	0.00665673	2.71355	0.119033	1.55885	0.0124634	0.940953	0.937349	0.223084
cg00808856	0.00558362	2.77128	0.119033	-1.55885	0.00675554	0.768345	0.356741	0.335697
cg00809988	0.0209213	-2.3094	0.686106	-0.404145	0.0457938	0.84731	0.885089	0.379951
cg00812578	0.0496472	1.96299	0.686106	-0.404145	0.0108079	0.504205	0.176916	0.490669
cg00817355	0.0433081	-2.02073	0.165857	1.38564	0.0362139	0.486088	0.47682	0.57588
cg00817502	0.00122428	3.23316	0.0832645	-1.73205	0.0018237	0.78516	0.322094	0.309017
cg00819619	0.0209213	2.3094	0.95396	-0.057735	0.0281298	0.65158	0.863984	0.353052
cg00822797	0.0282404	2.19393	0.488422	-0.69282	0.00880238	0.416506	0.670599	0.141986
cg00823172	0.00937477	2.59808	0.686106	0.404145	0.0346129	0.917947	0.569741	0.654109
cg00826610	0.00665673	-2.71355	0.204024	1.27017	0.0194604	0.684722	0.243479	0.688622
cg00828618	0.0326634	2.1362	0.204024	-1.27017	0.044476	0.839667	0.407215	0.91459
cg00830459	0.0326634	2.1362	0.488422	-0.69282	0.0373165	0.608621	0.318701	0.902052
cg00832644	0.0209213	2.3094	0.184209	-1.32791	0.0183346	0.338051	0.911537	0.209032
cg00833605	0.00558362	2.77128	0.148915	1.44338	0.00811073	0.431866	0.834744	0.464983
cg00838561	0.0326634	2.1362	0.908073	-0.11547	0.015192	0.358236	0.42907	0.581815
cg00838919	0.0326634	-2.1362	0.105969	1.61658	0.0313468	0.978991	0.627317	0.352362
cg00840597	0.00665673	2.71355	0.386476	-0.866025	0.0112455	0.826476	0.884431	0.461176
cg00841035	0.0496472	1.96299	0.272656	-1.09697	0.0399983	0.852947	0.421689	0.648781
cg00841680	0.00937477	2.59808	0.686106	-0.404145	0.0389108	0.784773	0.348348	0.878207
cg00841793	0.00791179	2.65581	0.86249	-0.173205	0.0148222	0.746501	0.494999	0.48547
cg00844231	0.0282404	2.19393	0.0646717	1.84752	0.0234364	0.609817	0.179957	0.6312
cg00844308	0.0433081	-2.02073	0.729034	-0.34641	0.0484098	0.613341	0.207058	0.599788
cg00846843	0.0326634	2.1362	0.95396	0.057735	0.0385232	0.934419	0.897292	0.503179
cg00846869	0.00149616	3.17543	0.686106	-0.404145	0.00140432	0.509226	0.388114	0.719658
cg00847277	0.00937477	-2.59808	0.95396	0.057735	0.0135382	0.805111	0.900738	0.429166
cg00848480	0.0153138	2.42487	0.95396	-0.057735	0.0329866	0.931963	0.4162	0.54817
cg00857117	0.0282404	2.19393	0.248213	-1.1547	0.0191381	0.369032	0.36073	0.301465
cg00866564	0.0179263	-2.36714	0.525373	-0.635085	0.00683486	0.228772	0.26292	0.889144
cg00869308	0.00466913	2.82902	0.0940686	-1.67432	0.0189053	0.534146	0.260413	0.941337
cg00869671	0.0326634	2.1362	0.817361	0.23094	0.0244678	0.632977	0.447996	0.495445
cg00876532	0.0326634	-2.1362	0.248213	-1.1547	0.0453056	0.817382	0.559274	0.556039
cg00877691	0.0282404	-2.19393	0.45292	0.750555	0.0398685	0.548842	0.607028	0.78135
cg00879221	0.0209213	-2.3094	0.817361	0.23094	0.0454744	0.841594	0.568634	0.504376
cg00881207	0.00937477	2.59808	0.563703	0.57735	0.00223545	0.346216	0.35896	0.250071
cg00883493	0.0110744	2.54034	0.248213	-1.1547	0.040131	0.752375	0.320953	0.898586
cg00885851	0.00937477	2.59808	0.148915	1.44338	0.0124262	0.984581	0.661021	0.504332
cg00886225	0.0376669	2.07846	0.77283	0.288675	0.0368274	0.93554	0.832054	0.436226
cg00889791	0.0496472	1.96299	0.488422	-0.69282	0.0379855	0.962061	0.454187	0.377839
cg00890010	0.0496472	-1.96299	0.248213	-1.1547	0.0423058	0.49224	0.368727	0.678494
cg00892294	0.0209213	2.3094	0.418923	-0.80829	0.00808522	0.87576	0.144037	0.465762
cg00893488	0.0496472	1.96299	0.77283	-0.288675	0.0381336	0.840083	0.607819	0.212199
cg00898200	0.0110744	2.54034	0.45292	0.750555	0.0109291	0.697774	0.306577	0.938259
cg00900302	0.0209213	2.3094	0.248213	-1.1547	0.0449493	0.816141	0.755254	0.690197
cg00902602	0.0376669	-2.07846	0.686106	-0.404145	0.0207611	0.243546	0.405416	0.218938
cg00903099	0.000658337	-3.40637	0.0734883	1.78979	0.000632515	0.51966	0.397687	0.685695
cg00903242	0.0496472	-1.96299	0.488422	-0.69282	0.033404	0.554952	0.676726	0.167524
cg00905584	0.0130425	2.48261	0.272656	-1.09697	0.0427178	0.840263	0.352595	0.705672
cg00906267	0.0179263	2.36714	0.686106	0.404145	0.00889015	0.715522	0.162898	0.430227
cg00907267	0.0179263	2.36714	0.729034	-0.34641	0.0137278	0.371629	0.705846	0.274465
cg00907833	0.0209213	2.3094	0.133327	-1.50111	0.0192083	0.617714	0.359056	0.492206
cg00911290	0.0243434	2.25167	0.386476	-0.866025	0.0449397	0.858582	0.48648	0.914408
cg00913163	0.0209213	2.3094	0.248213	1.1547	0.0204018	0.890496	0.412965	0.598349
cg00914222	0.0110744	-2.54034	0.488422	-0.69282	0.0131674	0.601239	0.501999	0.376382
cg00918743	0.0282404	2.19393	0.729034	-0.34641	0.034896	0.895635	0.525508	0.632836
cg00921669	0.0153138	2.42487	0.488422	0.69282	0.0142095	0.790669	0.916578	0.295821
cg00922281	0.00466913	2.82902	0.908073	-0.11547	0.0190834	0.763307	0.304603	0.998463
cg00922748	0.0110744	-2.54034	0.386476	0.866025	0.00865551	0.820942	0.930005	0.299184
cg00923304	0.0433081	2.02073	0.563703	-0.57735	0.0288664	0.298081	0.678318	0.252519
cg00923443	0.0130425	2.48261	0.817361	0.23094	0.0153723	0.927926	0.949167	0.538882
cg00924527	0.0153138	2.42487	0.729034	0.34641	0.0231624	0.449801	0.660598	0.193521
cg00925133	0.0153138	2.42487	0.644167	0.46188	0.0446682	0.67344	0.481647	0.870908
cg00927035	0.00323491	-2.94449	0.418923	0.80829	0.045188	0.824232	0.63162	0.692911
cg00927646	0.0209213	-2.3094	0.77283	0.288675	0.009004	0.187942	0.152218	0.641094
cg00932092	0.00665673	2.71355	0.148915	-1.44338	0.00285826	0.132733	0.572567	0.508844
cg00933176	0.00791179	2.65581	0.686106	0.404145	0.0033936	0.759584	0.102207	0.608647
cg00933835	0.0326634	-2.1362	0.45292	0.750555	0.0156547	0.27352	0.396164	0.266092
cg00933859	0.0153138	2.42487	0.326348	-0.981495	0.00707338	0.165117	0.921537	0.271115
cg00933914	0.00466913	2.82902	0.563703	0.57735	0.00972401	0.82519	0.922378	0.968441
cg00935504	0.0153138	2.42487	0.45292	-0.750555	0.0183072	0.753172	0.340773	0.632059
cg00936895	0.0130425	2.48261	0.298698	1.03923	0.0099498	0.892502	0.305291	0.424495
cg00936935	0.0433081	2.02073	0.326348	-0.981495	0.0211187	0.532501	0.313323	0.208101
cg00937742	0.0376669	2.07846	0.386476	-0.866025	0.0325107	0.710058	0.804822	0.290022
cg00939032	0.000532006	3.4641	0.729034	0.34641	0.000533077	0.748008	0.280907	0.311095
cg00944873	0.0243434	2.25167	0.77283	-0.288675	0.0203344	0.535678	0.842369	0.148047
cg00945487	0.0433081	2.02073	0.908073	0.11547	0.0431152	0.575748	0.335403	0.716063
cg00946479	0.0243434	-2.25167	0.326348	0.981495	0.00989797	0.250365	0.355208	0.512357
cg00955911	0.00268017	-3.00222	0.45292	-0.750555	0.0048122	0.55474	0.7831	0.337634
cg00956423	0.0496472	1.96299	0.248213	1.1547	0.0300967	0.726882	0.623444	0.213378
cg00957002	0.0282404	2.19393	0.488422	0.69282	0.0491928	0.826293	0.603088	0.778674
cg00958225	0.00558362	2.77128	0.908073	0.11547	0.0160293	0.572666	0.79402	0.817243
cg00962459	0.0433081	2.02073	0.729034	-0.34641	0.0482112	0.845599	0.568573	0.234724
cg00962984	0.0130425	2.48261	0.248213	1.1547	0.0237158	0.617629	0.741126	0.93452
cg00965617	0.0209213	2.3094	0.272656	-1.09697	0.042945	0.740474	0.497216	0.761218
cg00966398	0.0496472	-1.96299	0.225346	-1.21244	0.0374553	0.638478	0.813125	0.235579
cg00967316	0.00389242	2.88675	0.603332	-0.519615	0.0206382	0.516702	0.992749	0.865078
cg00967531	0.0243434	2.25167	0.603332	-0.519615	0.0422013	0.699129	0.721289	0.833221
cg00971718	0.0110744	2.54034	1	0	0.0486213	0.827338	0.560306	0.946384
cg00972731	0.0326634	2.1362	0.817361	0.23094	0.0217305	0.864567	0.201722	0.45825
cg00973424	0.00665673	2.71355	0.45292	0.750555	0.0135153	0.456286	0.879432	0.872275
cg00974579	0.0179263	2.36714	0.248213	-1.1547	0.0146778	0.410876	0.903395	0.485351
cg00975238	0.0376669	2.07846	0.86249	-0.173205	0.0467089	0.983631	0.433174	0.455037
cg00975975	0.0376669	2.07846	0.95396	0.057735	0.0448457	0.976277	0.363318	0.599109
cg00976381	0.0209213	2.3094	0.686106	-0.404145	0.0233321	0.343917	0.28967	0.987627
cg00980194	0.0153138	2.42487	0.563703	0.57735	0.0205826	0.947599	0.33339	0.954647
cg00980625	0.00937477	2.59808	0.204024	-1.27017	0.0256155	0.776493	0.598545	0.951255
cg00981975	0.0496472	1.96299	0.563703	-0.57735	0.0297289	0.864607	0.198166	0.725733
cg00982082	0.0243434	2.25167	0.148915	-1.44338	0.00897678	0.469327	0.101877	0.990853
cg00987049	0.0110744	2.54034	0.77283	-0.288675	0.0191398	0.2688	0.500431	0.535588
cg00988785	0.00665673	2.71355	0.418923	-0.80829	0.0051281	0.263827	0.695164	0.478905
cg00993127	0.0243434	2.25167	0.386476	0.866025	0.0328099	0.891037	0.295438	0.754839
cg00994717	0.00122428	3.23316	0.488422	-0.69282	0.000421832	0.423568	0.612267	0.676275
cg00996588	0.00182274	3.11769	0.603332	-0.519615	0.00618925	0.910453	0.256933	0.863701
cg01000771	0.0153138	2.42487	0.525373	-0.635085	0.00813648	0.783306	0.137591	0.577905
cg01002857	0.0282404	2.19393	0.817361	-0.23094	0.0420652	0.536608	0.895127	0.592728
cg01003399	0.0433081	-2.02073	0.686106	0.404145	0.0367254	0.305651	0.426735	0.521271
cg01003812	0.0376669	2.07846	0.0832645	1.73205	0.0119553	0.60155	0.453701	0.240044
cg01003893	0.00389242	2.88675	0.817361	0.23094	0.00980879	0.838087	0.799068	0.830179
cg01007838	0.0376669	-2.07846	0.644167	-0.46188	0.0353505	0.446218	0.351491	0.49979
cg01008011	0.0130425	2.48261	0.488422	0.69282	0.03634	0.914708	0.337915	0.746144
cg01008904	0.0376669	-2.07846	1	0	0.0209053	0.33155	0.695732	0.368805
cg01010990	0.0130425	2.48261	0.644167	0.46188	0.0193861	0.499959	0.598141	0.612355
cg01012273	0.0179263	2.36714	0.525373	0.635085	0.0227789	0.629471	0.832713	0.488473
cg01012495	0.00389242	2.88675	0.45292	-0.750555	0.00490625	0.801864	0.489351	0.0620607
cg01013385	0.0326634	2.1362	0.95396	0.057735	0.0285469	0.820749	0.511192	0.202215
cg01015632	0.0376669	2.07846	0.525373	-0.635085	0.0383022	0.446465	0.251601	0.826837
cg01017395	0.0209213	2.3094	0.386476	0.866025	0.00845146	0.74002	0.243769	0.257472
cg01019875	0.0243434	2.25167	0.148915	-1.44338	0.0215065	0.193166	0.264754	0.786175
cg01021610	0.00791179	2.65581	0.729034	0.34641	0.0241402	0.749746	0.474943	0.826164
cg01022780	0.0376669	-2.07846	0.644167	0.46188	0.0249135	0.443852	0.379104	0.49451
cg01023872	0.0326634	-2.1362	0.95396	0.057735	0.0179729	0.554966	0.22874	0.270386
cg01027209	0.0376669	2.07846	0.298698	-1.03923	0.0391381	0.358593	0.949145	0.514964
cg01030534	0.000812117	-3.34863	0.644167	0.46188	0.010491	0.780425	0.458363	0.678692
cg01030951	0.00791179	-2.65581	0.488422	-0.69282	0.00265728	0.545047	0.664383	0.0684474
cg01034726	0.0376669	2.07846	0.603332	-0.519615	0.0316737	0.956297	0.934916	0.257498
cg01040649	0.0326634	2.1362	0.686106	0.404145	0.0151474	0.728593	0.238912	0.491968
cg01043845	0.0326634	-2.1362	0.184209	-1.32791	0.0269232	0.22581	0.889756	0.561982
cg01044662	0.0326634	-2.1362	0.908073	0.11547	0.0380312	0.613392	0.394026	0.479403
cg01050691	0.00558362	2.77128	0.298698	-1.03923	0.0212935	0.890897	0.617351	0.5768
cg01051537	0.0153138	2.42487	0.86249	-0.173205	0.0199477	0.480565	0.293085	0.739609
cg01051581	0.0496472	1.96299	0.908073	0.11547	0.0376895	0.84307	0.293807	0.847431
cg01052614	0.0496472	1.96299	0.603332	-0.519615	0.0435654	0.500796	0.487033	0.647335
cg01053087	0.0130425	2.48261	0.45292	0.750555	0.0252564	0.733113	0.707492	0.502163
cg01053750	0.0130425	2.48261	0.418923	0.80829	0.0227433	0.746995	0.686469	0.569765
cg01054668	0.0110744	2.54034	0.686106	-0.404145	0.0451464	0.676388	0.545704	0.698512
cg01054725	0.0433081	2.02073	0.908073	-0.11547	0.0113721	0.780143	0.230448	0.158144
cg01056853	0.0282404	2.19393	0.386476	-0.866025	0.0467895	0.556738	0.544175	0.681278
cg01057532	0.0282404	2.19393	0.386476	-0.866025	0.0376933	0.603571	0.55709	0.794346
cg01057741	0.0282404	2.19393	0.418923	-0.80829	0.0127286	0.90039	0.0669843	0.760068
cg01058850	0.0130425	2.48261	0.355611	-0.92376	0.0200708	0.70921	0.939657	0.534584
cg01066179	0.000658337	3.40637	0.686106	-0.404145	0.00112727	0.666111	0.908373	0.979592
cg01068931	0.0209213	-2.3094	0.729034	-0.34641	0.0282824	0.398542	0.557174	0.323976
cg01071444	0.0153138	2.42487	0.86249	0.173205	0.0273846	0.767432	0.505138	0.415344
cg01073463	0.00182274	-3.11769	0.272656	1.09697	0.00056262	0.259672	0.0524225	0.816088
cg01076387	0.0179263	2.36714	0.204024	1.27017	0.0161209	0.971642	0.18718	0.52766
cg01080924	0.00937477	-2.59808	0.644167	-0.46188	0.00597063	0.221887	0.809491	0.396951
cg01081456	0.0376669	-2.07846	0.644167	0.46188	0.0426101	0.431846	0.94069	0.350515
cg01084270	0.0326634	2.1362	0.908073	-0.11547	0.0453936	0.953982	0.665833	0.574161
cg01084827	0.0130425	-2.48261	0.184209	-1.32791	0.0334817	0.857783	0.34567	0.956461
cg01084846	0.0243434	2.25167	0.184209	-1.32791	0.0393864	0.734999	0.511482	0.610899
cg01089288	0.0153138	2.42487	0.77283	-0.288675	0.0207107	0.993192	0.359238	0.719847
cg01089516	0.0153138	-2.42487	0.165857	1.38564	0.0436596	0.693056	0.237206	0.857836
cg01091242	0.0209213	2.3094	0.525373	-0.635085	0.0378263	0.847992	0.895712	0.806019
cg01096847	0.00268017	3.00222	0.86249	-0.173205	0.0136289	0.874618	0.458972	0.721571
cg01097897	0.0376669	-2.07846	0.148915	-1.44338	0.0322623	0.386796	0.51069	0.295462
cg01099274	0.0326634	-2.1362	0.272656	1.09697	0.0313288	0.243818	0.566861	0.453621
cg01100494	0.0130425	2.48261	0.817361	-0.23094	0.0341516	0.919125	0.776473	0.455338
cg01101127	0.00937477	2.59808	0.86249	0.173205	0.0235267	0.954201	0.304709	0.918747
cg01103730	0.0496472	1.96299	0.77283	0.288675	0.0114864	0.341359	0.906842	0.234735
cg01104200	0.0326634	2.1362	0.45292	-0.750555	0.0176692	0.905325	0.412195	0.230897
cg01106618	0.0433081	-2.02073	0.686106	-0.404145	0.0485557	0.870558	0.529911	0.495659
cg01111718	0.00937477	2.59808	0.248213	1.1547	0.0160369	0.969497	0.877281	0.419
cg01114497	0.0496472	1.96299	0.184209	-1.32791	0.0269382	0.595677	0.459445	0.280848
cg01116188	0.0326634	2.1362	0.355611	-0.92376	0.023454	0.697325	0.550977	0.276003
cg01116484	0.0326634	2.1362	0.644167	-0.46188	0.037575	0.483961	0.629366	0.406076
cg01117148	0.00268017	3.00222	0.77283	-0.288675	0.00322582	0.481652	0.804373	0.485545
cg01117410	0.0376669	2.07846	0.563703	0.57735	0.0348744	0.890832	0.476278	0.569914
cg01118541	0.0209213	2.3094	0.355611	-0.92376	0.0481066	0.629651	0.307653	0.795955
cg01119072	0.00937477	2.59808	0.603332	-0.519615	0.0440349	0.652219	0.322576	0.869975
cg01119912	0.0282404	2.19393	0.77283	0.288675	0.0151704	0.85365	0.580359	0.209317
cg01121965	0.0209213	-2.3094	0.603332	0.519615	0.0377152	0.837877	0.490238	0.913669
cg01122366	0.0209213	2.3094	0.77283	-0.288675	0.0248667	0.717962	0.2155	0.859882
cg01123770	0.0433081	2.02073	0.355611	-0.92376	0.0430471	0.595947	0.335411	0.644829
cg01125676	0.0496472	-1.96299	0.418923	-0.80829	0.0169399	0.501332	0.055986	0.929399
cg01126910	0.0209213	2.3094	0.386476	-0.866025	0.00442273	0.935441	0.066102	0.99958
cg01128107	0.00323491	-2.94449	0.326348	-0.981495	0.00436332	0.541068	0.78876	0.211503
cg01128161	0.0110744	2.54034	0.86249	0.173205	0.0182949	0.79665	0.392293	0.612972
cg01130727	0.0179263	2.36714	0.603332	0.519615	0.0245313	0.402392	0.602676	0.457798
cg01131388	0.0282404	2.19393	0.729034	0.34641	0.0469374	0.919442	0.871928	0.857458
cg01132056	0.0130425	2.48261	0.686106	0.404145	0.0274912	0.836485	0.496058	0.524855
cg01132602	0.0496472	-1.96299	0.225346	1.21244	0.00467521	0.0886048	0.511081	0.0524792
cg01134380	0.0179263	2.36714	0.45292	-0.750555	0.0390346	0.915616	0.315689	0.428782
cg01136261	0.0130425	2.48261	0.418923	0.80829	0.00777544	0.738009	0.393739	0.166481
cg01137047	0.0326634	-2.1362	0.45292	0.750555	0.0315786	0.478237	0.67459	0.186088
cg01138728	0.0179263	2.36714	0.86249	0.173205	0.038345	0.567999	0.793916	0.495972
cg01142837	0.0326634	2.1362	0.488422	-0.69282	0.0201215	0.783034	0.238228	0.820846
cg01145700	0.0326634	-2.1362	0.204024	1.27017	0.00817286	0.150078	0.231222	0.177104
cg01148576	0.0209213	2.3094	0.184209	-1.32791	0.00685775	0.0981924	0.639932	0.38128
cg01148860	0.0433081	2.02073	0.908073	-0.11547	0.0423166	0.698283	0.741729	0.443045
cg01151439	0.0243434	2.25167	0.133327	-1.50111	0.0297076	0.447678	0.558119	0.582337
cg01153451	0.0376669	2.07846	0.488422	-0.69282	0.0452404	0.48687	0.807641	0.614935
cg01156127	0.0243434	2.25167	0.418923	-0.80829	0.0154675	0.428874	0.881427	0.133443
cg01159980	0.0110744	-2.54034	0.525373	-0.635085	0.0159376	0.380362	0.728528	0.575722
cg01165776	0.0496472	-1.96299	0.95396	0.057735	0.0218719	0.278897	0.231185	0.454406
cg01166253	0.0153138	-2.42487	0.563703	-0.57735	0.0129884	0.365367	0.96755	0.305528
cg01166310	0.00323491	-2.94449	0.204024	-1.27017	0.00692151	0.633232	0.803835	0.603787
cg01166946	0.0179263	2.36714	0.603332	-0.519615	0.037172	0.895061	0.996225	0.575151
cg01166947	0.000812117	3.34863	0.355611	-0.92376	0.0040716	0.525941	0.816417	0.569392
cg01167694	0.0433081	2.02073	0.908073	0.11547	0.012655	0.542011	0.0718724	0.42152
cg01168776	0.0209213	2.3094	0.355611	-0.92376	0.0269984	0.5543	0.704535	0.380036
cg01170240	0.0433081	2.02073	0.45292	-0.750555	0.0465376	0.844238	0.638128	0.517162
cg01171885	0.0282404	2.19393	0.0940686	-1.67432	0.0402684	0.773064	0.533894	0.667286
cg01176516	0.0433081	-2.02073	0.77283	-0.288675	0.00547627	0.102108	0.13391	0.491507
cg01177168	0.0243434	2.25167	0.908073	0.11547	0.017622	0.709339	0.536216	0.30954
cg01178099	0.0179263	2.36714	0.165857	-1.38564	0.0119861	0.711759	0.32434	0.673367
cg01178451	0.0282404	-2.19393	0.488422	-0.69282	0.0354415	0.730912	0.794403	0.583672
cg01178624	0.0153138	2.42487	0.563703	-0.57735	0.00945025	0.320428	0.34859	0.153319
cg01179256	0.0110744	2.54034	0.729034	-0.34641	0.0135162	0.517802	0.188251	0.965488
cg01181307	0.00791179	2.65581	0.77283	-0.288675	0.025583	0.698925	0.46261	0.959288
cg01181350	0.00791179	-2.65581	1	0	0.00826487	0.909105	0.908009	0.374288
cg01181758	0.00791179	2.65581	0.0940686	-1.67432	0.014399	0.800741	0.329044	0.919028
cg01181845	0.0376669	2.07846	0.908073	0.11547	0.0334428	0.471428	0.694623	0.164081
cg01185766	0.0130425	-2.48261	0.525373	0.635085	0.0157474	0.465183	0.312779	0.278908
cg01188914	0.0209213	2.3094	0.563703	-0.57735	0.00675945	0.233449	0.232437	0.209573
cg01192952	0.00323491	2.94449	0.45292	-0.750555	0.00171992	0.400278	0.724761	0.225345
cg01196304	0.0433081	2.02073	0.603332	0.519615	0.0400939	0.517544	0.554459	0.56256
cg01200493	0.0110744	2.54034	0.326348	-0.981495	0.0450495	0.972734	0.574099	0.938868
cg01201519	0.0243434	-2.25167	0.908073	-0.11547	0.0419657	0.503813	0.974176	0.620108
cg01201932	0.0209213	2.3094	0.686106	0.404145	0.035475	0.814242	0.833528	0.931306
cg01202382	0.0153138	-2.42487	0.184209	1.32791	0.0315911	0.744987	0.354347	0.615092
cg01202491	0.0376669	2.07846	0.0646717	-1.84752	0.0116793	0.143934	0.268734	0.408457
cg01203205	0.00466913	2.82902	0.95396	-0.057735	0.00729193	0.731735	0.528366	0.449168
cg01203847	0.0376669	-2.07846	0.686106	-0.404145	0.0122287	0.46267	0.724056	0.0568692
cg01204356	0.0433081	2.02073	0.488422	-0.69282	0.0294978	0.6098	0.57712	0.278539
cg01209635	0.0209213	-2.3094	0.86249	-0.173205	0.0290705	0.454086	0.351325	0.764587
cg01209930	0.00389242	2.88675	0.386476	0.866025	0.0238064	0.956049	0.805661	0.508608
cg01210307	0.0243434	2.25167	0.355611	0.92376	0.0474106	0.665839	0.636679	0.458974
cg01219103	0.0282404	2.19393	0.355611	0.92376	0.0329748	0.866621	0.181514	0.900473
cg01219345	0.00558362	2.77128	0.272656	-1.09697	0.026382	0.390735	0.391558	0.387344
cg01223499	0.00937477	2.59808	0.355611	-0.92376	0.0259585	0.75863	0.385466	0.52214
cg01224520	0.0179263	2.36714	1	0	0.0303383	0.879211	0.602587	0.416459
cg01231009	0.00665673	2.71355	0.644167	0.46188	0.0191032	0.510845	0.994728	0.702072
cg01234678	0.00937477	-2.59808	0.563703	-0.57735	0.00571113	0.215125	0.361363	0.800651
cg01234724	0.00665673	2.71355	1	0	0.00300446	0.366583	0.395294	0.409022
cg01236027	0.0110744	2.54034	1	0	0.0295865	0.889173	0.697132	0.758931
cg01236932	0.0433081	2.02073	0.686106	-0.404145	0.0327895	0.294572	0.738069	0.824507
cg01237677	0.0376669	2.07846	0.326348	-0.981495	0.03756	0.815123	0.955689	0.474184
cg01240653	0.0130425	-2.48261	0.418923	0.80829	0.0360032	0.829976	0.660006	0.568998
cg01244253	0.0433081	2.02073	0.908073	-0.11547	0.0389465	0.314341	0.142106	0.917132
cg01246649	0.00558362	2.77128	0.225346	1.21244	0.0235601	0.808372	0.795307	0.972677
cg01247948	0.0282404	2.19393	0.165857	1.38564	0.0429711	0.402813	0.602893	0.457305
cg01248520	0.00791179	2.65581	0.563703	-0.57735	0.00312928	0.339826	0.254379	0.690936
cg01249054	0.00937477	2.59808	0.418923	0.80829	0.0224342	0.89801	0.846212	0.462136
cg01250864	0.0376669	2.07846	0.119033	-1.55885	0.0449542	0.851505	0.693492	0.461425
cg01253327	0.00558362	-2.77128	1	0	0.0153181	0.934968	0.550761	0.467601
cg01259527	0.0110744	-2.54034	0.95396	0.057735	0.00821753	0.597989	0.157363	0.968274
cg01265031	0.0153138	2.42487	0.0734883	1.78979	0.0281507	0.94396	0.428907	0.747584
cg01267150	0.0153138	2.42487	0.644167	-0.46188	0.0436306	0.98991	0.639249	0.592458
cg01267259	0.00323491	2.94449	0.603332	0.519615	0.00186357	0.512767	0.954893	0.262716
cg01269576	0.0496472	1.96299	0.86249	0.173205	0.0292983	0.850279	0.304056	0.429103
cg01270064	0.0433081	2.02073	0.86249	-0.173205	0.0482207	0.423037	0.866832	0.533874
cg01270721	0.00791179	2.65581	0.86249	-0.173205	0.0225732	0.660571	0.39709	0.858553
cg01273012	0.0209213	2.3094	0.45292	-0.750555	0.0387098	0.829161	0.307924	0.650767
cg01277072	0.0376669	-2.07846	1	0	0.0210992	0.642928	0.334021	0.263912
cg01280390	0.0376669	2.07846	0.165857	1.38564	0.0333522	0.176315	0.791965	0.858898
cg01281450	0.0243434	2.25167	0.95396	-0.057735	0.0251006	0.425894	0.783325	0.64955
cg01282906	0.0153138	2.42487	0.908073	0.11547	0.0171114	0.716106	0.660555	0.322549
cg01284182	0.0496472	1.96299	0.248213	-1.1547	0.0361435	0.23002	0.603424	0.82318
cg01285783	0.0282404	-2.19393	0.644167	-0.46188	0.0238664	0.356771	0.231084	0.974804
cg01287750	0.0282404	2.19393	0.686106	-0.404145	0.0446422	0.701976	0.698398	0.939782
cg01294197	0.0376669	2.07846	0.298698	1.03923	0.0386624	0.980392	0.485378	0.837749
cg01295034	0.00937477	-2.59808	0.86249	0.173205	0.0138118	0.325831	0.442735	0.477207
cg01296926	0.0433081	2.02073	0.603332	0.519615	0.0475629	0.97818	0.39346	0.453582
cg01299549	0.0326634	2.1362	0.86249	-0.173205	0.0366547	0.871459	0.414348	0.491815
cg01303619	0.00937477	2.59808	0.86249	-0.173205	0.0150989	0.805595	0.895834	0.776376
cg01306514	0.0326634	2.1362	0.148915	-1.44338	0.0490801	0.585806	0.437086	0.576644
cg01307398	0.0433081	-2.02073	0.488422	-0.69282	0.03676	0.624188	0.284647	0.492857
cg01309428	0.00937477	2.59808	0.77283	-0.288675	0.0393982	0.873235	0.586822	0.848964
cg01310205	0.0376669	2.07846	0.298698	-1.03923	0.0216093	0.672284	0.492327	0.327734
cg01312482	0.0496472	-1.96299	0.729034	0.34641	0.0294768	0.437678	0.286688	0.194125
cg01315070	0.00665673	2.71355	0.45292	-0.750555	0.0132698	0.908626	0.378554	0.390202
cg01316476	0.0110744	-2.54034	0.563703	-0.57735	0.0115478	0.869904	0.170375	0.848434
cg01321637	0.0110744	2.54034	0.248213	-1.1547	0.0420455	0.932136	0.606276	0.600595
cg01324084	0.0130425	2.48261	0.204024	-1.27017	0.00810204	0.393097	0.455092	0.415805
cg01325270	0.0496472	1.96299	0.817361	-0.23094	0.0135798	0.305276	0.220602	0.360188
cg01326813	0.0243434	-2.25167	0.686106	0.404145	0.0465461	0.401591	0.879954	0.306796
cg01328890	0.00937477	-2.59808	0.0832645	1.73205	0.00169879	0.100096	0.0888838	0.529948
cg01329283	0.0243434	2.25167	0.272656	-1.09697	0.0452648	0.801465	0.645933	0.460211
cg01331923	0.0209213	-2.3094	0.326348	0.981495	0.0238573	0.23815	0.486239	0.559641
cg01332206	0.0243434	2.25167	0.418923	0.80829	0.0131294	0.550856	0.872739	0.467816
cg01332342	0.0282404	2.19393	0.817361	-0.23094	0.0396617	0.607495	0.510014	0.523496
cg01333535	0.00268017	3.00222	0.488422	-0.69282	0.0184464	0.908875	0.650416	0.626093
cg01336696	0.0326634	-2.1362	0.525373	0.635085	0.022293	0.440321	0.464215	0.382382
cg01337273	0.0376669	2.07846	0.225346	-1.21244	0.0455878	0.82175	0.355003	0.723611
cg01342981	0.0376669	-2.07846	0.355611	-0.92376	0.0245653	0.368181	0.183471	0.519184
cg01349792	0.00558362	2.77128	0.326348	-0.981495	0.0115614	0.210182	0.82217	0.371037
cg01350190	0.0130425	-2.48261	0.248213	1.1547	0.0351042	0.824161	0.36972	0.456458
cg01351022	0.0282404	2.19393	0.86249	0.173205	0.00930297	0.700236	0.317682	0.195024
cg01351857	0.0496472	-1.96299	0.86249	0.173205	0.0350755	0.696597	0.62359	0.134619
cg01355430	0.0282404	-2.19393	0.525373	-0.635085	0.0396646	0.346181	0.837181	0.422249
cg01359469	0.00558362	2.77128	0.86249	0.173205	0.0139354	0.561725	0.492688	0.434133
cg01360417	0.0130425	-2.48261	0.105969	1.61658	0.0231194	0.933789	0.843772	0.508273
cg01362959	0.0496472	1.96299	0.272656	-1.09697	0.0281933	0.453951	0.150592	0.79506
cg01364826	0.00937477	2.59808	0.525373	-0.635085	0.0483857	0.796387	0.530305	0.724347
cg01366462	0.0326634	-2.1362	0.418923	0.80829	0.0492854	0.484067	0.317445	0.631696
cg01367097	0.00665673	2.71355	0.95396	0.057735	0.0455858	0.998938	0.419188	0.926641
cg01370437	0.0243434	2.25167	0.603332	-0.519615	0.0241168	0.596955	0.485226	0.994654
cg01374281	0.00389242	2.88675	0.686106	-0.404145	0.0420622	0.94598	0.5553	0.816085
cg01374580	0.00558362	2.77128	1	0	0.00544029	0.59667	0.627043	0.238233
cg01378878	0.00323491	2.94449	0.686106	-0.404145	0.0381092	0.75682	0.32057	0.862541
cg01384290	0.000658337	-3.40637	0.0940686	1.67432	0.0217336	0.857798	0.340764	0.991858
cg01386828	0.00389242	2.88675	0.77283	-0.288675	0.00144872	0.120654	0.338603	0.491987
cg01387792	0.0326634	2.1362	0.686106	-0.404145	0.017139	0.90956	0.16417	0.908592
cg01388988	0.00323491	2.94449	0.184209	-1.32791	0.0128931	0.931602	0.230861	0.800132
cg01389871	0.0153138	2.42487	0.45292	-0.750555	0.0361042	0.587342	0.411754	0.602184
cg01392238	0.0326634	-2.1362	0.204024	1.27017	0.0339018	0.313065	0.458391	0.392402
cg01392313	0.00665673	2.71355	0.603332	-0.519615	0.00219524	0.422103	0.770149	0.0502172
cg01392941	0.0153138	-2.42487	0.908073	0.11547	0.0326062	0.231586	0.495844	0.862468
cg01395174	0.0282404	2.19393	0.603332	-0.519615	0.0141206	0.163234	0.808963	0.30761
cg01395351	0.00665673	-2.71355	0.133327	1.50111	0.0444396	0.813589	0.498376	0.928383
cg01401641	0.0209213	2.3094	0.95396	0.057735	0.019616	0.876028	0.211152	0.960671
cg01402735	0.0376669	2.07846	0.248213	-1.1547	0.0293085	0.623579	0.381598	0.939635
cg01403566	0.00937477	2.59808	0.326348	-0.981495	0.00642078	0.964035	0.172934	0.624006
cg01405985	0.0110744	2.54034	0.0832645	-1.73205	0.0458615	0.837135	0.437428	0.836157
cg01407406	0.0496472	-1.96299	0.0940686	-1.67432	0.0153555	0.885064	0.249674	0.605443
cg01408298	0.0153138	2.42487	0.77283	0.288675	0.0197124	0.568748	0.996255	0.551604
cg01411255	0.0433081	2.02073	0.95396	0.057735	0.0428512	0.95621	0.801008	0.599106
cg01415341	0.0376669	2.07846	0.326348	0.981495	0.035046	0.908525	0.269802	0.433606
cg01417823	0.0243434	2.25167	0.488422	0.69282	0.0483715	0.897487	0.223127	0.922146
cg01418256	0.0179263	-2.36714	0.0832645	1.73205	0.019643	0.869444	0.857335	0.514017
cg01418322	0.0243434	2.25167	0.45292	-0.750555	0.0420163	0.861401	0.479047	0.476449
cg01418351	0.00122428	-3.23316	0.817361	0.23094	0.000837758	0.0877241	0.909207	0.391373
cg01421558	0.0130425	2.48261	1	0	0.0216367	0.952704	0.665824	0.599083
cg01422797	0.0209213	-2.3094	0.77283	0.288675	0.0252221	0.647883	0.498034	0.770646
cg01425709	0.0496472	-1.96299	0.77283	-0.288675	0.0478195	0.715815	0.534214	0.196583
cg01430172	0.0496472	1.96299	0.488422	0.69282	0.0260371	0.669935	0.427072	0.716317
cg01431057	0.0110744	-2.54034	0.488422	0.69282	0.00502716	0.904795	0.411178	0.122168
cg01433422	0.0130425	2.48261	0.563703	0.57735	0.020866	0.677033	0.814636	0.621212
cg01435315	0.0130425	2.48261	0.525373	-0.635085	0.0434842	0.810446	0.325475	0.558528
cg01435442	0.0130425	-2.48261	0.488422	0.69282	0.0195848	0.406603	0.947471	0.510512
cg01440489	0.0282404	2.19393	0.563703	-0.57735	0.00382417	0.0830379	0.499505	0.140151
cg01441025	0.00937477	2.59808	0.0832645	1.73205	0.024322	0.759442	0.735904	0.935924
cg01446605	0.0243434	-2.25167	0.418923	0.80829	0.0173499	0.336438	0.254333	0.980435
cg01450302	0.0243434	2.25167	0.908073	-0.11547	0.0471573	0.660599	0.934718	0.329624
cg01454305	0.0179263	2.36714	0.686106	-0.404145	0.0221284	0.954434	0.385012	0.549606
cg01454389	0.0376669	2.07846	0.355611	-0.92376	0.0459068	0.624477	0.25516	0.763933
cg01454638	0.00466913	2.82902	0.817361	0.23094	0.0389646	0.931883	0.561362	0.678142
cg01461254	0.00323491	-2.94449	0.0567468	1.90526	0.0032575	0.818207	0.820915	0.215696
cg01464438	0.0433081	-2.02073	0.225346	-1.21244	0.0483336	0.313556	0.838453	0.261555
cg01468344	0.0243434	2.25167	0.644167	0.46188	0.0310717	0.821061	0.777395	0.561564
cg01470340	0.0179263	-2.36714	0.603332	0.519615	0.0391588	0.668987	0.754608	0.64646
cg01471066	0.0179263	2.36714	0.77283	-0.288675	0.0220393	0.749728	0.367517	0.521395
cg01476743	0.00937477	-2.59808	0.908073	0.11547	0.0051602	0.624176	0.344006	0.459446
cg01478434	0.0179263	-2.36714	1	0	0.0338097	0.540543	0.497551	0.590059
cg01482645	0.00937477	2.59808	0.729034	-0.34641	0.00571065	0.867135	0.317116	0.174302
cg01484716	0.00268017	3.00222	0.908073	0.11547	0.00759336	0.882608	0.687254	0.75848
cg01485009	0.000344158	3.57957	1	0	0.00136664	0.311242	0.513955	0.60324
cg01485046	0.0326634	2.1362	0.386476	-0.866025	0.0402399	0.820329	0.349837	0.514204
cg01485215	0.0282404	2.19393	0.488422	-0.69282	0.0143338	0.23824	0.890395	0.325009
cg01489523	0.0496472	1.96299	0.817361	-0.23094	0.0362782	0.669349	0.390873	0.66671
cg01490258	0.0326634	-2.1362	0.729034	0.34641	0.00793802	0.219292	0.266232	0.939467
cg01491871	0.0376669	2.07846	0.105969	-1.61658	0.0339141	0.364814	0.469906	0.310996
cg01493150	0.0433081	2.02073	0.86249	0.173205	0.0279858	0.851148	0.744919	0.326146
cg01494441	0.00466913	-2.82902	0.488422	0.69282	0.0111936	0.547268	0.516812	0.485773
cg01500527	0.0496472	1.96299	1	0	0.0382774	0.942964	0.543983	0.30487
cg01502829	0.0496472	1.96299	0.908073	0.11547	0.0394372	0.616379	0.233118	0.648565
cg01504379	0.0209213	-2.3094	0.86249	-0.173205	0.0474091	0.850494	0.309837	0.63633
cg01504705	0.0376669	2.07846	0.272656	-1.09697	0.0122235	0.971871	0.36899	0.258724
cg01507173	0.0209213	2.3094	0.119033	-1.55885	0.00832865	0.365395	0.105499	0.582198
cg01512654	0.0243434	2.25167	0.603332	0.519615	0.0394579	0.665236	0.817177	0.772451
cg01514353	0.0433081	2.02073	0.225346	-1.21244	0.0310889	0.924717	0.214273	0.680773
cg01515659	0.0110744	2.54034	0.644167	-0.46188	0.0383382	0.816617	0.354751	0.956694
cg01517654	0.0179263	-2.36714	0.77283	-0.288675	0.031192	0.50065	0.740208	0.28644
cg01521449	0.0130425	2.48261	0.563703	-0.57735	0.0185624	0.913954	0.822814	0.168334
cg01529753	0.00558362	2.77128	0.817361	-0.23094	0.0105945	0.953725	0.378363	0.77651
cg01530213	0.0282404	2.19393	0.386476	0.866025	0.0234506	0.757353	0.926897	0.691398
cg01530633	0.00182274	3.11769	0.603332	-0.519615	0.0043696	0.843105	0.799024	0.387561
cg01531542	0.0179263	2.36714	0.686106	-0.404145	0.0221026	0.838459	0.218883	0.87353
cg01532694	0.00182274	-3.11769	0.119033	-1.55885	0.00640109	0.752852	0.669567	0.786855
cg01533082	0.0243434	2.25167	0.525373	0.635085	0.0371052	0.979612	0.78472	0.574842
cg01534593	0.0130425	2.48261	0.817361	0.23094	0.0495888	0.625757	0.963419	0.485169
cg01544641	0.0326634	2.1362	0.729034	-0.34641	0.0467938	0.906613	0.419371	0.871748
cg01551133	0.0326634	-2.1362	0.77283	0.288675	0.0122647	0.651941	0.13294	0.562601
cg01554304	0.00665673	2.71355	0.908073	-0.11547	0.0467783	0.856667	0.481035	0.214131
cg01554410	0.0130425	2.48261	0.86249	-0.173205	0.00525538	0.278669	0.412637	0.351754
cg01554963	0.0282404	-2.19393	0.386476	-0.866025	0.0149986	0.688665	0.682315	0.439932
cg01559152	0.0243434	2.25167	0.644167	-0.46188	0.0317884	0.522639	0.33318	0.983278
cg01563335	0.0496472	-1.96299	0.45292	0.750555	0.0496772	0.763519	0.601114	0.518846
cg01563731	0.0376669	2.07846	0.225346	-1.21244	0.0276083	0.432905	0.391214	0.315535
cg01564818	0.0110744	-2.54034	0.817361	0.23094	0.0497008	0.896957	0.636176	0.489015
cg01565438	0.0496472	-1.96299	0.603332	0.519615	0.0496579	0.690701	0.569208	0.355052
cg01565803	0.0153138	2.42487	0.272656	-1.09697	0.0227839	0.615828	0.295599	0.923116
cg01568317	0.0179263	2.36714	0.563703	0.57735	0.0161226	0.911208	0.218197	0.69365
cg01570309	0.00791179	2.65581	0.0734883	-1.78979	0.013057	0.797041	0.464142	0.937025
cg01571223	0.00389242	2.88675	0.86249	0.173205	0.0083458	0.451949	0.364189	0.702045
cg01576149	0.0209213	2.3094	0.908073	-0.11547	0.0400729	0.770903	0.264073	0.954769
cg01577707	0.0376669	2.07846	0.77283	0.288675	0.0322262	0.86257	0.783638	0.52255
cg01579479	0.0110744	2.54034	0.644167	-0.46188	0.0368028	0.98353	0.902617	0.829962
cg01579884	0.0326634	2.1362	0.298698	1.03923	0.0343895	0.70103	0.718481	0.79576
cg01581060	0.0209213	2.3094	0.95396	-0.057735	0.0204837	0.936428	0.248529	0.87636
cg01583021	0.0433081	2.02073	0.86249	-0.173205	0.0248477	0.692033	0.464442	0.236186
cg01586532	0.00937477	2.59808	0.563703	0.57735	0.0114171	0.975125	0.720407	0.614065
cg01587896	0.0130425	-2.48261	0.86249	0.173205	0.00722663	0.897042	0.948135	0.269819
cg01588748	0.0326634	-2.1362	0.908073	-0.11547	0.0139094	0.327434	0.440923	0.819603
cg01589580	0.00665673	-2.71355	0.133327	-1.50111	0.00212457	0.306761	0.815318	0.208942
cg01591487	0.0209213	2.3094	0.563703	-0.57735	0.0196947	0.474878	0.27832	0.506748
cg01593757	0.0179263	-2.36714	0.729034	0.34641	0.0379311	0.805413	0.900034	0.654481
cg01599742	0.00268017	3.00222	0.86249	0.173205	0.00878416	0.870686	0.405645	0.755291
cg01600788	0.0243434	2.25167	0.298698	1.03923	0.0219376	0.966042	0.324195	0.633624
cg01601198	0.0326634	-2.1362	0.105969	-1.61658	0.0112939	0.686808	0.71577	0.132401
cg01601518	0.0153138	-2.42487	0.133327	-1.50111	0.0330878	0.348458	0.431743	0.459586
cg01601816	0.00791179	2.65581	0.204024	-1.27017	0.00497999	0.983954	0.107824	0.735873
cg01603043	0.00149616	3.17543	0.525373	-0.635085	0.00694434	0.953662	0.469956	0.970628
cg01603740	0.0433081	-2.02073	0.86249	0.173205	0.0300169	0.669008	0.708436	0.342088
cg01604946	0.0496472	-1.96299	0.525373	0.635085	0.0178117	0.333317	0.508896	0.219983
cg01605366	0.00937477	2.59808	1	0	0.0234753	0.571371	0.730218	0.568302
cg01612247	0.0433081	2.02073	0.386476	-0.866025	0.00824862	0.780702	0.193504	0.247304
cg01615114	0.0110744	2.54034	0.45292	-0.750555	0.0209367	0.546918	0.856674	0.275807
cg01616876	0.00221369	-3.05996	0.908073	0.11547	0.0170456	0.638525	0.946171	0.770362
cg01617074	0.0243434	2.25167	0.298698	-1.03923	0.0360603	0.745317	0.422445	0.840504
cg01619546	0.0243434	2.25167	0.225346	-1.21244	0.0136473	0.516587	0.456018	0.666286
cg01620233	0.0130425	2.48261	0.644167	0.46188	0.0412352	0.912226	0.85003	0.869983
cg01620416	0.0326634	2.1362	0.77283	-0.288675	0.0176046	0.724656	0.24439	0.393231
cg01622385	0.0243434	-2.25167	0.298698	1.03923	0.0179166	0.951955	0.483125	0.434215
cg01623548	0.0110744	2.54034	0.644167	0.46188	0.0215409	0.455332	0.97729	0.74555
cg01625297	0.0282404	2.19393	0.386476	-0.866025	0.0178757	0.860441	0.348541	0.514498
cg01625382	0.0179263	2.36714	0.686106	-0.404145	0.0357919	0.569971	0.649871	0.951162
cg01625851	0.0130425	2.48261	0.729034	0.34641	0.0316868	0.859677	0.71645	0.517429
cg01626918	0.0496472	1.96299	0.45292	0.750555	0.0416068	0.764746	0.292975	0.888554
cg01628128	0.0153138	2.42487	0.386476	-0.866025	0.0315533	0.934867	0.915746	0.704213
cg01629435	0.0496472	1.96299	0.418923	-0.80829	0.0493814	0.388683	0.442765	0.598416
cg01631744	0.0433081	-2.02073	0.0646717	-1.84752	0.0302655	0.683236	0.405917	0.347026
cg01632881	0.0433081	-2.02073	0.298698	1.03923	0.0241098	0.240594	0.685847	0.294631
cg01633184	0.0179263	-2.36714	1	0	0.0421492	0.838063	0.615825	0.50807
cg01635117	0.0282404	2.19393	0.86249	-0.173205	0.0153708	0.476096	0.80555	0.299711
cg01642743	0.0282404	2.19393	0.488422	-0.69282	0.00962188	0.412109	0.290089	0.306435
cg01643250	0.00389242	2.88675	0.729034	-0.34641	0.0177345	0.606821	0.456091	0.876415
cg01643690	0.00268017	3.00222	0.563703	0.57735	0.00849787	0.953406	0.956302	0.550584
cg01644385	0.00665673	-2.71355	0.0734883	-1.78979	0.0070636	0.553103	0.739982	0.230111
cg01644699	0.0179263	2.36714	0.644167	-0.46188	0.0234868	0.588802	0.285176	0.639704
cg01646508	0.00558362	2.77128	0.488422	-0.69282	0.0164182	0.582457	0.513089	0.966078
cg01649307	0.000998686	3.2909	0.0734883	1.78979	0.000279106	0.528059	0.122335	0.203162
cg01655743	0.0110744	2.54034	0.225346	-1.21244	0.0155944	0.715383	0.410881	0.597854
cg01662301	0.0282404	2.19393	0.248213	1.1547	0.0281277	0.605114	0.806848	0.299886
cg01668054	0.00791179	2.65581	0.644167	-0.46188	0.0278278	0.798417	0.625989	0.865926
cg01669573	0.0179263	2.36714	0.45292	-0.750555	0.0282603	0.979615	0.444766	0.841781
cg01674000	0.0376669	2.07846	0.248213	-1.1547	0.0179153	0.62511	0.525495	0.162881
cg01679364	0.0110744	2.54034	0.603332	0.519615	0.0478642	0.54966	0.648999	0.945984
cg01684728	0.0209213	-2.3094	0.86249	0.173205	0.0186788	0.982146	0.899151	0.280908
cg01684810	0.0179263	2.36714	1	0	0.0295731	0.611713	0.782615	0.327604
cg01686412	0.0179263	2.36714	0.225346	1.21244	0.0460203	0.748256	0.99143	0.616134
cg01691856	0.0433081	2.02073	0.326348	0.981495	0.0247968	0.648673	0.490846	0.329142
cg01693328	0.000275504	3.63731	0.184209	-1.32791	0.00864131	0.945983	0.383552	0.720936
cg01697287	0.00466913	2.82902	0.95396	0.057735	0.013929	0.456513	0.988053	0.525997
cg01697687	0.0243434	-2.25167	0.418923	0.80829	0.0147457	0.352482	0.93649	0.282632
cg01697902	0.0376669	2.07846	0.563703	-0.57735	0.046251	0.805717	0.308835	0.875018
cg01699762	0.0496472	1.96299	0.105969	-1.61658	0.0319311	0.897456	0.328455	0.328667
cg01709348	0.0326634	-2.1362	0.603332	0.519615	0.0309984	0.63655	0.168009	0.503252
cg01711160	0.0433081	-2.02073	0.272656	1.09697	0.035986	0.930582	0.524413	0.719894
cg01711810	0.0153138	2.42487	0.204024	-1.27017	0.0214167	0.697846	0.971448	0.441742
cg01714588	0.0433081	2.02073	0.817361	0.23094	0.0391898	0.722878	0.333004	0.728453
cg01716680	0.0243434	2.25167	0.298698	-1.03923	0.0226722	0.700047	0.514019	0.633772
cg01718447	0.0209213	-2.3094	0.908073	-0.11547	0.028072	0.328422	0.169708	0.456293
cg01725746	0.0179263	2.36714	0.817361	-0.23094	0.0224344	0.434292	0.406734	0.474988
cg01735071	0.0130425	2.48261	0.86249	0.173205	0.0274086	0.947092	0.590308	0.955359
cg01747364	0.0179263	-2.36714	0.272656	1.09697	0.0294053	0.753908	0.309743	0.686016
cg01748018	0.00937477	2.59808	0.133327	-1.50111	0.00906379	0.978604	0.223645	0.474724
cg01749436	0.0496472	-1.96299	0.95396	-0.057735	0.0393373	0.730966	0.892035	0.243688
cg01750019	0.0153138	2.42487	0.0940686	-1.67432	0.0221288	0.602302	0.644542	0.561633
cg01751746	0.0496472	1.96299	0.0646717	1.84752	0.0352451	0.539255	0.538893	0.43749
cg01753270	0.0209213	-2.3094	0.488422	0.69282	0.0161744	0.574997	0.20987	0.60821
cg01755009	0.0433081	2.02073	0.165857	-1.38564	0.0448432	0.947895	0.30965	0.808704
cg01755037	0.0282404	2.19393	0.729034	0.34641	0.0383466	0.78664	0.907915	0.694847
cg01755216	0.0130425	2.48261	0.248213	-1.1547	0.0285463	0.978836	0.364395	0.857178
cg01755353	0.0282404	2.19393	0.644167	0.46188	0.0100193	0.873095	0.190247	0.499031
cg01758106	0.00791179	2.65581	0.603332	-0.519615	0.0225478	0.59608	0.853072	0.693931
cg01758637	0.0243434	-2.25167	0.326348	0.981495	0.038744	0.70418	0.547103	0.763965
cg01759218	0.0496472	1.96299	0.729034	-0.34641	0.033657	0.912369	0.205208	0.723929
cg01759337	0.0433081	-2.02073	0.119033	-1.55885	0.0253912	0.640847	0.437012	0.68721
cg01761369	0.0153138	-2.42487	0.817361	0.23094	0.0206241	0.382313	0.594057	0.41647
cg01762457	0.00558362	2.77128	0.272656	1.09697	0.041166	0.523295	0.464795	0.82591
cg01762584	0.0376669	2.07846	0.133327	-1.50111	0.0213119	0.391522	0.189522	0.848988
cg01766193	0.0376669	-2.07846	0.644167	-0.46188	0.0138217	0.155164	0.175276	0.656362
cg01766873	0.00389242	-2.88675	0.644167	-0.46188	0.00831512	0.879561	0.803985	0.764658
cg01766943	0.0153138	-2.42487	0.86249	-0.173205	0.0389474	0.476091	0.580464	0.76488
cg01767396	0.0243434	2.25167	0.355611	0.92376	0.0265242	0.680845	0.534603	0.761767
cg01767672	0.0179263	2.36714	0.165857	-1.38564	0.0165317	0.552597	0.199556	0.604075
cg01770654	0.0209213	-2.3094	0.603332	-0.519615	0.0350579	0.894304	0.435315	0.544151
cg01773515	0.0209213	2.3094	0.908073	-0.11547	0.029146	0.599838	0.176158	0.455216
cg01775331	0.00665673	2.71355	0.908073	0.11547	0.00535222	0.278455	0.768968	0.311544
cg01782533	0.0110744	2.54034	0.603332	0.519615	0.0185104	0.648225	0.798853	0.706339
cg01782798	0.0153138	2.42487	0.488422	-0.69282	0.0172731	0.428604	0.317548	0.702542
cg01785099	0.0376669	2.07846	0.77283	-0.288675	0.0468836	0.721571	0.506668	0.333094
cg01792257	0.0326634	2.1362	0.355611	-0.92376	0.0485015	0.938444	0.235716	0.568903
cg01798352	0.0243434	2.25167	0.248213	-1.1547	0.0338425	0.508184	0.517146	0.740759
cg01800146	0.0496472	-1.96299	0.133327	-1.50111	0.020105	0.461604	0.725354	0.308188
cg01801491	0.00221369	-3.05996	0.686106	-0.404145	0.00612964	0.41263	0.213178	0.615412
cg01802593	0.0326634	2.1362	0.355611	0.92376	0.042628	0.646372	0.835484	0.471069
cg01803415	0.0130425	-2.48261	0.298698	-1.03923	0.0365319	0.76882	0.572124	0.75353
cg01809234	0.00791179	2.65581	0.488422	0.69282	0.0207013	0.689414	0.471314	0.62993
cg01815907	0.0153138	-2.42487	0.418923	0.80829	0.0363037	0.714692	0.490525	0.491239
cg01815912	0.0282404	-2.19393	0.644167	0.46188	0.0393459	0.924562	0.452173	0.763993
cg01817393	0.0282404	-2.19393	0.817361	0.23094	0.0294271	0.795106	0.473935	0.637247
cg01820954	0.00268017	3.00222	0.86249	-0.173205	0.00396227	0.788785	0.864265	0.269371
cg01820965	0.0110744	2.54034	0.525373	-0.635085	0.0448962	0.799183	0.435059	0.676827
cg01822317	0.0179263	2.36714	0.563703	-0.57735	0.0153217	0.419761	0.438483	0.731441
cg01828275	0.0433081	-2.02073	1	0	0.0346168	0.527242	0.28679	0.555689
cg01829002	0.00268017	-3.00222	0.204024	-1.27017	0.0408883	0.86369	0.215883	0.373067
cg01831672	0.0153138	2.42487	0.45292	0.750555	0.0314516	0.795911	0.810136	0.673254
cg01835241	0.00665673	2.71355	0.525373	-0.635085	0.00727999	0.830684	0.711355	0.731298
cg01842807	0.0243434	2.25167	0.386476	-0.866025	0.048982	0.519879	0.323011	0.632881
cg01844110	0.00665673	2.71355	0.355611	0.92376	0.0134099	0.929656	0.377798	0.733879
cg01848115	0.00466913	2.82902	0.119033	-1.55885	0.00718437	0.78744	0.253854	0.373033
cg01851411	0.0153138	2.42487	0.45292	0.750555	0.0272248	0.580462	0.308309	0.896936
cg01853347	0.0433081	-2.02073	0.644167	-0.46188	0.0237036	0.84315	0.378375	0.200612
cg01853949	0.0130425	2.48261	0.0832645	1.73205	0.0192885	0.493957	0.570978	0.870361
cg01857937	0.0110744	2.54034	0.686106	-0.404145	0.0292698	0.888489	0.893412	0.967525
cg01858698	0.00937477	-2.59808	0.686106	-0.404145	0.00494878	0.142575	0.70803	0.327228
cg01858828	0.0326634	-2.1362	0.165857	1.38564	0.0443496	0.486698	0.438328	0.530751
cg01859415	0.0496472	1.96299	0.298698	1.03923	0.0311666	0.457961	0.167329	0.804871
cg01865066	0.00389242	2.88675	0.418923	-0.80829	0.0200903	0.931566	0.666721	0.803043
cg01867652	0.00466913	2.82902	0.95396	-0.057735	0.02985	0.798688	0.989115	0.880627
cg01868187	0.000658337	3.40637	0.386476	0.866025	0.000292489	0.693147	0.937112	0.618263
cg01868755	0.0179263	2.36714	1	0	0.0224375	0.657893	0.442825	0.717976
cg01868782	0.0179263	-2.36714	0.644167	-0.46188	0.0376663	0.593762	0.472057	0.905886
cg01870480	0.0376669	2.07846	0.563703	-0.57735	0.0437935	0.435274	0.268097	0.530478
cg01871121	0.0179263	2.36714	0.729034	-0.34641	0.0220046	0.322432	0.67027	0.342991
cg01871763	0.0496472	1.96299	0.563703	-0.57735	0.0377417	0.2951	0.466733	0.362032
cg01872224	0.0209213	2.3094	0.0940686	-1.67432	0.0303193	0.468953	0.446678	0.664503
cg01873153	0.0376669	2.07846	0.95396	0.057735	0.0433219	0.667469	0.277675	0.825088
cg01873983	0.000812117	3.34863	0.563703	-0.57735	0.00463267	0.579156	0.3947	0.682132
cg01874183	0.0130425	2.48261	0.686106	0.404145	0.0135861	0.688406	0.910219	0.317715
cg01874863	0.0433081	-2.02073	0.326348	0.981495	0.0130882	0.975214	0.38132	0.0754997
cg01875057	0.0209213	-2.3094	0.119033	-1.55885	0.00914069	0.636489	0.195352	0.567942
cg01877816	0.0376669	2.07846	0.326348	-0.981495	0.024607	0.880005	0.792817	0.223006
cg01878462	0.00937477	-2.59808	0.729034	0.34641	0.00133215	0.230418	0.448305	0.212611
cg01881828	0.0433081	-2.02073	0.77283	0.288675	0.043625	0.326613	0.789535	0.228198
cg01884217	0.0282404	2.19393	0.563703	-0.57735	0.0226052	0.497149	0.260821	0.62561
cg01886035	0.0209213	-2.3094	0.644167	-0.46188	0.0286347	0.832402	0.378328	0.27085
cg01887803	0.0179263	2.36714	0.908073	0.11547	0.0388425	0.939328	0.560981	0.911012
cg01890637	0.0209213	-2.3094	0.326348	-0.981495	0.00721871	0.221175	0.374263	0.457171
cg01894322	0.0496472	1.96299	0.326348	-0.981495	0.025049	0.816461	0.139634	0.307666
cg01895398	0.0326634	2.1362	0.525373	0.635085	0.0408415	0.500328	0.366685	0.441557
cg01896230	0.0326634	2.1362	0.0646717	-1.84752	0.0261336	0.765258	0.337015	0.562707
cg01896807	0.0179263	2.36714	0.603332	-0.519615	0.0477341	0.861358	0.431507	0.854063
cg01900240	0.00323491	-2.94449	0.525373	-0.635085	0.00327835	0.970967	0.476998	0.304899
cg01904727	0.0110744	2.54034	0.148915	1.44338	0.0164915	0.529753	0.591154	0.16228
cg01910445	0.0153138	2.42487	0.225346	-1.21244	0.00800362	0.228976	0.577217	0.41234
cg01910527	0.0130425	2.48261	0.298698	-1.03923	0.00927104	0.599869	0.81359	0.645391
cg01912076	0.000532006	3.4641	0.908073	0.11547	0.0075139	0.695935	0.69365	0.836965
cg01916115	0.00665673	-2.71355	0.525373	-0.635085	0.0410059	0.981228	0.52749	0.551952
cg01916477	0.0130425	2.48261	0.165857	-1.38564	0.041725	0.717182	0.231118	0.733095
cg01917657	0.00466913	2.82902	0.77283	-0.288675	0.00294556	0.808695	0.303996	0.295305
cg01919863	0.0243434	2.25167	0.488422	-0.69282	0.0391571	0.786496	0.33918	0.594403
cg01921899	0.0282404	2.19393	0.326348	-0.981495	0.0402383	0.727005	0.893117	0.510746
cg01922937	0.0376669	2.07846	0.95396	-0.057735	0.0385293	0.344257	0.333645	0.890563
cg01923620	0.0282404	2.19393	0.0832645	-1.73205	0.0132746	0.262763	0.20329	0.535137
cg01925114	0.00937477	2.59808	0.77283	-0.288675	0.0170298	0.897483	0.431656	0.804018
cg01927532	0.00221369	3.05996	0.86249	0.173205	0.00479388	0.459718	0.7118	0.418362
cg01934709	0.0179263	2.36714	0.729034	-0.34641	0.0276227	0.531872	0.502003	0.658963
cg01935840	0.0153138	2.42487	0.908073	-0.11547	0.0219489	0.735696	0.265799	0.771495
cg01940593	0.00389242	2.88675	0.355611	0.92376	0.0067177	0.974879	0.782211	0.637578
cg01941619	0.0209213	2.3094	0.248213	1.1547	0.0214193	0.66127	0.541889	0.322911
cg01943233	0.0433081	2.02073	0.204024	-1.27017	0.00547081	0.486293	0.131499	0.102081
cg01944593	0.0433081	2.02073	0.248213	-1.1547	0.0338982	0.754999	0.279554	0.282146
cg01944751	0.00389242	-2.88675	0.563703	-0.57735	0.0109102	0.924452	0.681736	0.676868
cg01947837	0.0110744	2.54034	0.248213	-1.1547	0.027521	0.867736	0.308589	0.992781
cg01949520	0.0243434	2.25167	0.133327	-1.50111	0.031499	0.349299	0.802645	0.467394
cg01953835	0.0209213	2.3094	0.418923	0.80829	0.0194269	0.167223	0.879624	0.657052
cg01955377	0.00937477	-2.59808	0.386476	0.866025	0.0463881	0.602555	0.527576	0.974859
cg01958456	0.00182274	3.11769	0.386476	-0.866025	0.00326196	0.909908	0.983481	0.674323
cg01959774	0.0433081	-2.02073	0.644167	-0.46188	0.0463223	0.459294	0.552458	0.453965
cg01960160	0.0433081	-2.02073	0.488422	0.69282	0.0120355	0.593328	0.103228	0.505757
cg01963057	0.00558362	2.77128	0.686106	0.404145	0.0184595	0.703247	0.926142	0.793511
cg01963064	0.0433081	2.02073	0.45292	-0.750555	0.0439027	0.646869	0.51798	0.567206
cg01963464	0.00558362	2.77128	0.603332	-0.519615	0.000700161	0.695893	0.0501221	0.0621691
cg01966791	0.0326634	-2.1362	0.686106	0.404145	0.025788	0.889965	0.529234	0.301531
cg01969558	0.0130425	2.48261	0.204024	-1.27017	0.00931558	0.281323	0.550553	0.203323
cg01970802	0.0433081	-2.02073	0.0734883	1.78979	0.0366286	0.994085	0.766713	0.28731
cg01971258	0.0376669	2.07846	0.184209	1.32791	0.0393529	0.450377	0.18999	0.887262
cg01972118	0.0496472	1.96299	0.644167	-0.46188	0.0445339	0.262261	0.539059	0.402313
cg01974091	0.0243434	-2.25167	0.184209	1.32791	0.0244502	0.753251	0.610814	0.658337
cg01974138	0.00149616	3.17543	0.95396	0.057735	0.00595263	0.831319	0.740736	0.815242
cg01977487	0.000998686	3.2909	0.418923	0.80829	0.00181766	0.794821	0.787169	0.738116
cg01980568	0.00268017	3.00222	0.488422	-0.69282	0.00364065	0.84156	0.887742	0.675746
cg01981314	0.0376669	2.07846	0.0567468	-1.90526	0.0208762	0.560002	0.101054	0.69254
cg01982422	0.0130425	2.48261	0.45292	-0.750555	0.00790174	0.47568	0.189273	0.449589
cg01987766	0.0209213	2.3094	0.817361	0.23094	0.0319395	0.973534	0.573669	0.510049
cg01987885	0.0326634	2.1362	0.488422	-0.69282	0.032149	0.300149	0.892529	0.310032
cg01993997	0.00791179	2.65581	0.225346	-1.21244	0.0301039	0.920084	0.503697	0.913224
cg01994425	0.0179263	-2.36714	0.418923	-0.80829	0.00861324	0.985119	0.805122	0.0810855
cg01995289	0.0326634	-2.1362	0.386476	-0.866025	0.0338945	0.629452	0.673004	0.997273
cg01999076	0.00665673	-2.71355	0.45292	-0.750555	0.0139668	0.302972	0.421869	0.210649
cg01999819	0.0110744	2.54034	0.86249	0.173205	0.00480278	0.469361	0.226284	0.153596
cg02002972	0.0496472	1.96299	0.86249	-0.173205	0.01603	0.0895582	0.356529	0.673167
cg02005157	0.00558362	2.77128	0.105969	-1.61658	0.00678282	0.726184	0.471039	0.473652
cg02005246	0.0110744	2.54034	0.86249	0.173205	0.022748	0.799847	0.971565	0.707381
cg02011257	0.00558362	-2.77128	0.908073	0.11547	0.00250087	0.87188	0.0788838	0.915889
cg02011685	0.0433081	2.02073	0.355611	-0.92376	0.0146778	0.409163	0.0874604	0.421307
cg02013652	0.0153138	2.42487	0.686106	0.404145	0.0246142	0.471334	0.799299	0.927983
cg02015261	0.0496472	1.96299	0.418923	-0.80829	0.0124816	0.617353	0.185809	0.405941
cg02020590	0.0209213	2.3094	0.298698	-1.03923	0.0315284	0.728577	0.464787	0.583224
cg02021288	0.0433081	-2.02073	0.563703	-0.57735	0.0390745	0.707832	0.592097	0.328921
cg02021544	0.0243434	2.25167	0.45292	-0.750555	0.0198765	0.500679	0.65397	0.465042
cg02022322	0.0376669	2.07846	0.729034	0.34641	0.0434552	0.354159	0.684582	0.460706
cg02026180	0.0130425	2.48261	0.355611	-0.92376	0.00940158	0.567609	0.536505	0.257569
cg02027833	0.0110744	2.54034	0.488422	-0.69282	0.00263041	0.886188	0.338907	0.102788
cg02028246	0.0243434	2.25167	0.45292	0.750555	0.0366113	0.657793	0.539207	0.645664
cg02030353	0.0376669	2.07846	0.95396	0.057735	0.0467706	0.870104	0.275089	0.907465
cg02030592	0.0326634	2.1362	0.326348	-0.981495	0.0408831	0.376576	0.323997	0.778836
cg02034293	0.0376669	2.07846	0.272656	-1.09697	0.019353	0.592348	0.383181	0.698908
cg02035300	0.0130425	2.48261	0.525373	0.635085	0.0194743	0.448487	0.912081	0.736668
cg02042997	0.00937477	-2.59808	0.563703	0.57735	0.0131344	0.347954	0.654419	0.798711
cg02050202	0.00323491	2.94449	0.729034	-0.34641	0.00393596	0.54318	0.186021	0.932967
cg02050512	0.00937477	2.59808	0.95396	-0.057735	0.0450262	0.942935	0.748209	0.371396
cg02051325	0.0282404	-2.19393	0.148915	-1.44338	0.0322474	0.899694	0.298266	0.920237
cg02055404	0.0153138	-2.42487	0.525373	-0.635085	0.00139263	0.0561678	0.380194	0.325964
cg02055817	0.00791179	2.65581	0.272656	-1.09697	0.0413705	0.524132	0.656382	0.864807
cg02059849	0.0282404	2.19393	0.525373	-0.635085	0.0490843	0.86287	0.484016	0.632055
cg02061634	0.0326634	2.1362	0.817361	-0.23094	0.022113	0.713632	0.47374	0.405571
cg02063076	0.0179263	2.36714	0.272656	-1.09697	0.0369628	0.701566	0.615183	0.764886
cg02064183	0.0433081	2.02073	0.184209	-1.32791	0.0446671	0.828728	0.442784	0.295576
cg02066521	0.0433081	2.02073	0.488422	-0.69282	0.028354	0.73677	0.440071	0.158842
cg02066784	0.00389242	2.88675	0.298698	-1.03923	0.0206091	0.848874	0.452993	0.570084
cg02068255	0.0153138	2.42487	0.603332	-0.519615	0.0192578	0.873648	0.377046	0.892482
cg02071702	0.0243434	2.25167	0.119033	-1.55885	0.0379029	0.670702	0.227772	0.863615
cg02074558	0.0153138	-2.42487	0.248213	1.1547	0.0420054	0.789924	0.928223	0.47145
cg02075221	0.0179263	2.36714	0.686106	-0.404145	0.0299707	0.861968	0.273516	0.753973
cg02075590	0.0153138	2.42487	0.603332	-0.519615	0.0180803	0.567726	0.767144	0.262189
cg02078525	0.0153138	-2.42487	0.644167	-0.46188	0.049352	0.966295	0.804623	0.564447
cg02082642	0.0433081	2.02073	0.77283	0.288675	0.0480844	0.540988	0.537618	0.592667
cg02086457	0.0130425	2.48261	0.817361	0.23094	0.0320417	0.960921	0.313764	0.473929
cg02087079	0.0243434	-2.25167	0.908073	0.11547	0.0119853	0.227144	0.197939	0.628231
cg02088166	0.0433081	2.02073	1	0	0.0145083	0.298116	0.135169	0.869543
cg02088550	0.0433081	2.02073	0.77283	-0.288675	0.0304195	0.285992	0.859886	0.187223
cg02091716	0.0376669	2.07846	0.729034	-0.34641	0.0490609	0.869834	0.36157	0.762972
cg02094354	0.00323491	2.94449	0.908073	-0.11547	0.0179858	0.914854	0.840678	0.730925
cg02096059	0.0376669	-2.07846	0.729034	0.34641	0.0407091	0.188947	0.771482	0.698521
cg02099919	0.0153138	-2.42487	0.326348	-0.981495	0.00369711	0.20166	0.0818843	0.54472
cg02102807	0.0110744	2.54034	0.488422	-0.69282	0.0375299	0.741942	0.324708	0.912362
cg02104112	0.0326634	-2.1362	0.729034	-0.34641	0.0355374	0.37161	0.280193	0.408714
cg02108015	0.0130425	2.48261	0.817361	0.23094	0.0428305	0.865405	0.731887	0.829968
cg02115610	0.00665673	-2.71355	0.488422	0.69282	0.00838602	0.400181	0.915395	0.5292
cg02117952	0.00558362	-2.77128	0.355611	-0.92376	0.013009	0.861803	0.555644	0.810613
cg02123798	0.0243434	2.25167	0.908073	-0.11547	0.024931	0.845713	0.434324	0.525072
cg02124060	0.00791179	2.65581	0.86249	-0.173205	0.00366034	0.250647	0.518976	0.285533
cg02131349	0.0282404	2.19393	0.204024	1.27017	0.0238681	0.897765	0.414524	0.613606
cg02131499	0.0110744	2.54034	0.418923	0.80829	0.0154281	0.433935	0.333241	0.521394
cg02132107	0.0209213	2.3094	0.86249	-0.173205	0.0264772	0.57327	0.241346	0.846472
cg02132783	0.00937477	2.59808	0.272656	-1.09697	0.0117082	0.825607	0.477217	0.934966
cg02132909	0.00937477	2.59808	0.77283	0.288675	0.0095797	0.761446	0.866404	0.422147
cg02133266	0.00665673	2.71355	0.298698	-1.03923	0.0105036	0.458428	0.327398	0.180827
cg02134353	0.0130425	-2.48261	0.95396	-0.057735	0.0308028	0.574819	0.788135	0.520646
cg02134923	0.0326634	2.1362	0.644167	0.46188	0.0377515	0.96074	0.633051	0.26473
cg02140136	0.0243434	-2.25167	0.248213	-1.1547	0.0372543	0.560871	0.849413	0.60252
cg02142707	0.00466913	2.82902	0.686106	-0.404145	0.0119772	0.552088	0.0908999	0.620103
cg02144874	0.0243434	2.25167	0.86249	0.173205	0.0227561	0.32811	0.441703	0.582347
cg02146296	0.0496472	1.96299	0.686106	0.404145	0.0455123	0.851186	0.339527	0.386509
cg02147364	0.0496472	-1.96299	0.563703	-0.57735	0.0233468	0.850193	0.157002	0.332917
cg02148091	0.0433081	2.02073	0.165857	-1.38564	0.0217126	0.363752	0.441089	0.461371
cg02149376	0.00791179	2.65581	0.45292	-0.750555	0.0347384	0.821966	0.558197	0.674367
cg02152351	0.0496472	1.96299	0.644167	0.46188	0.0488098	0.720398	0.704639	0.418801
cg02159303	0.0209213	2.3094	0.817361	0.23094	0.0180629	0.791569	0.209412	0.839504
cg02164140	0.0130425	2.48261	0.603332	0.519615	0.0247249	0.612802	0.92782	0.846688
cg02165858	0.0153138	2.42487	0.603332	-0.519615	0.0240469	0.791201	0.474158	0.879435
cg02166513	0.0496472	1.96299	0.272656	-1.09697	0.0450894	0.995756	0.23029	0.915827
cg02168148	0.0243434	-2.25167	0.644167	0.46188	0.0389107	0.493351	0.584724	0.559835
cg02168303	0.0110744	-2.54034	0.298698	-1.03923	0.0174833	0.55487	0.838125	0.404699
cg02173923	0.00122428	3.23316	0.817361	0.23094	0.0126994	0.791712	0.553339	0.813737
cg02174096	0.0153138	2.42487	0.603332	-0.519615	0.00561713	0.184958	0.0890278	0.874892
cg02176280	0.0243434	-2.25167	0.686106	-0.404145	0.0402193	0.808614	0.584399	0.586866
cg02185402	0.000998686	3.2909	0.729034	-0.34641	0.0110729	0.708417	0.431458	0.672505
cg02187937	0.00221369	3.05996	0.729034	-0.34641	0.0207027	0.859487	0.67492	0.908967
cg02191183	0.0376669	2.07846	0.488422	-0.69282	0.0394192	0.739762	0.296789	0.573414
cg02192230	0.0153138	2.42487	0.817361	-0.23094	0.0071889	0.767736	0.0709336	0.682131
cg02192528	0.0376669	-2.07846	0.86249	0.173205	0.0155043	0.442917	0.746572	0.0978526
cg02192815	0.0179263	2.36714	0.95396	-0.057735	0.0409909	0.929616	0.443745	0.640609
cg02193640	0.0376669	2.07846	0.817361	-0.23094	0.0494055	0.690525	0.491065	0.368166
cg02194714	0.0282404	-2.19393	0.644167	-0.46188	0.00959871	0.171708	0.530407	0.822853
cg02194715	0.0326634	2.1362	0.272656	-1.09697	0.0402069	0.885111	0.530006	0.48514
cg02202052	0.0326634	-2.1362	0.817361	0.23094	0.0153213	0.511778	0.428935	0.221997
cg02205602	0.00466913	2.82902	0.729034	0.34641	0.00968013	0.399524	0.675093	0.839931
cg02206395	0.0243434	2.25167	0.326348	0.981495	0.039989	0.721761	0.483313	0.451702
cg02209288	0.0282404	2.19393	0.418923	-0.80829	0.0472978	0.364144	0.442285	0.999649
cg02209765	0.00791179	2.65581	0.603332	0.519615	0.0117132	0.789377	0.944895	0.338462
cg02213822	0.0282404	2.19393	0.77283	-0.288675	0.039326	0.732859	0.345006	0.457638
cg02214188	0.0496472	1.96299	0.45292	0.750555	0.0478532	0.837101	0.535263	0.633829
cg02215217	0.0110744	2.54034	0.225346	1.21244	0.0251315	0.43598	0.866268	0.550052
cg02218496	0.00389242	2.88675	0.729034	-0.34641	0.00669994	0.272216	0.254109	0.631596
cg02222646	0.0326634	-2.1362	0.729034	-0.34641	0.0453244	0.4346	0.700642	0.164518
cg02223423	0.00268017	3.00222	0.45292	-0.750555	0.00126479	0.67761	0.4673	0.692185
cg02223684	0.0496472	1.96299	0.686106	0.404145	0.0434271	0.998215	0.435628	0.774852
cg02224786	0.00665673	2.71355	0.204024	1.27017	0.00834514	0.502938	0.927567	0.984476
cg02225085	0.000812117	-3.34863	0.686106	0.404145	0.000677127	0.378234	0.4635	0.560294
cg02226827	0.00937477	2.59808	0.355611	-0.92376	0.00973111	0.264676	0.608778	0.588084
cg02234234	0.0153138	2.42487	0.908073	0.11547	0.0377413	0.661229	0.5089	0.825422
cg02234936	0.0153138	2.42487	0.298698	-1.03923	0.0296662	0.921795	0.417677	0.939654
cg02237244	0.0130425	2.48261	0.817361	0.23094	0.0433905	0.537994	0.234481	0.766009
cg02238229	0.0110744	2.54034	0.908073	-0.11547	0.00397516	0.760263	0.356539	0.49435
cg02241145	0.0209213	2.3094	0.298698	-1.03923	0.0271197	0.465767	0.686638	0.491604
cg02243061	0.0326634	2.1362	0.386476	-0.866025	0.034004	0.831197	0.555124	0.678082
cg02243160	0.00558362	2.77128	0.204024	-1.27017	0.0250011	0.904711	0.674584	0.586362
cg02243276	0.0496472	1.96299	0.105969	-1.61658	0.0375324	0.687762	0.255562	0.440099
cg02245488	0.0130425	-2.48261	0.298698	1.03923	0.0185924	0.974795	0.691832	0.234954
cg02252322	0.00389242	2.88675	0.95396	0.057735	0.00303668	0.770724	0.908587	0.569985
cg02253576	0.0179263	2.36714	1	0	0.0388559	0.852019	0.735518	0.659799
cg02254709	0.0376669	2.07846	0.386476	-0.866025	0.0367699	0.801361	0.224415	0.940376
cg02255454	0.0282404	2.19393	0.272656	-1.09697	0.0339904	0.956483	0.523855	0.354977
cg02255829	0.0433081	-2.02073	0.0832645	1.73205	0.0349965	0.246249	0.400669	0.692757
cg02257031	0.0326634	2.1362	1	0	0.0483992	0.683841	0.462167	0.719984
cg02258381	0.0496472	1.96299	0.686106	-0.404145	0.0428372	0.666558	0.367311	0.674835
cg02260589	0.00389242	2.88675	0.326348	-0.981495	0.00344182	0.780301	0.786429	0.255429
cg02261874	0.00221369	3.05996	0.148915	1.44338	0.00365819	0.507497	0.87888	0.979211
cg02262553	0.0282404	2.19393	0.729034	-0.34641	0.0092628	0.200957	0.528997	0.458852
cg02266791	0.00323491	2.94449	0.603332	0.519615	0.00699218	0.734857	0.896899	0.904013
cg02269855	0.0243434	2.25167	1	0	0.0429321	0.781815	0.590083	0.71568
cg02274728	0.0282404	-2.19393	0.326348	0.981495	0.044948	0.572499	0.376813	0.861316
cg02276073	0.0433081	2.02073	0.0832645	-1.73205	0.0497607	0.363619	0.205281	0.605103
cg02277216	0.00665673	2.71355	0.418923	-0.80829	0.0115466	0.737605	0.740661	0.629124
cg02279405	0.0376669	2.07846	0.204024	-1.27017	0.00732275	0.90307	0.230718	0.349353
cg02280226	0.00221369	-3.05996	0.45292	-0.750555	0.00718022	0.803062	0.904888	0.936527
cg02285003	0.00268017	3.00222	0.326348	-0.981495	0.00165297	0.287343	0.671384	0.302888
cg02285838	0.0243434	2.25167	0.603332	-0.519615	0.0158802	0.700555	0.244627	0.593214
cg02285920	0.0376669	-2.07846	0.644167	0.46188	0.0386046	0.6112	0.685314	0.501994
cg02286968	0.0433081	2.02073	0.77283	-0.288675	0.0285305	0.722419	0.286812	0.915373
cg02288294	0.00791179	2.65581	0.105969	-1.61658	0.00722063	0.93209	0.362832	0.465413
cg02288748	0.00937477	2.59808	0.95396	0.057735	0.00830104	0.239648	0.627132	0.201082
cg02289438	0.0110744	-2.54034	0.603332	-0.519615	0.00537117	0.607281	0.17278	0.844623
cg02291908	0.0110744	2.54034	0.248213	-1.1547	0.0195976	0.916783	0.594726	0.878662
cg02295386	0.0110744	2.54034	0.418923	0.80829	0.0101017	0.870552	0.600842	0.445208
cg02298116	0.0326634	-2.1362	0.729034	-0.34641	0.025367	0.675708	0.515519	0.704727
cg02299441	0.0179263	-2.36714	0.45292	0.750555	0.00923381	0.978691	0.99155	0.109973
cg02299602	0.0282404	2.19393	0.355611	0.92376	0.0413493	0.686753	0.499013	0.548185
cg02301436	0.00268017	3.00222	0.488422	0.69282	0.00138377	0.960888	0.617266	0.77611
cg02305473	0.00791179	2.65581	0.817361	-0.23094	0.0147126	0.869651	0.509159	0.782266
cg02306639	0.0433081	2.02073	0.272656	-1.09697	0.0216722	0.296846	0.634994	0.510803
cg02308359	0.0179263	2.36714	0.86249	-0.173205	0.00965165	0.47312	0.702905	0.0769869
cg02308564	0.00323491	-2.94449	0.95396	0.057735	0.044128	0.96725	0.279601	0.836338
cg02312647	0.0282404	-2.19393	0.525373	-0.635085	0.0124331	0.240763	0.465145	0.341294
cg02313709	0.00791179	-2.65581	0.603332	0.519615	0.00237913	0.468522	0.260875	0.0974549
cg02321886	0.0496472	-1.96299	0.248213	1.1547	0.0450947	0.559058	0.672904	0.574901
cg02322205	0.0282404	2.19393	0.355611	-0.92376	0.0170345	0.454162	0.266022	0.626346
cg02323506	0.00221369	3.05996	0.729034	-0.34641	0.00436753	0.88278	0.439529	0.428561
cg02328239	0.0110744	-2.54034	0.603332	-0.519615	0.00664022	0.796617	0.182692	0.19162
cg02328789	0.0376669	2.07846	0.184209	-1.32791	0.0428732	0.765859	0.177657	0.996819
cg02329916	0.0130425	2.48261	0.563703	0.57735	0.0152721	0.671453	0.784278	0.494635
cg02332500	0.0153138	2.42487	0.86249	-0.173205	0.0470568	0.773262	0.392684	0.595863
cg02332525	0.0433081	2.02073	0.686106	0.404145	0.00654947	0.565525	0.0888275	0.140272
cg02335030	0.0243434	2.25167	0.204024	-1.27017	0.0205452	0.267784	0.212943	0.823267
cg02335533	0.0179263	-2.36714	0.184209	1.32791	0.00802344	0.700816	0.308022	0.283432
cg02335915	0.00323491	2.94449	0.248213	-1.1547	0.011684	0.364428	0.825153	0.506819
cg02339083	0.0282404	-2.19393	0.686106	-0.404145	0.042988	0.943448	0.354497	0.783224
cg02343103	0.0153138	-2.42487	1	0	0.0430304	0.473401	0.327604	0.849181
cg02343430	0.0282404	2.19393	0.0646717	-1.84752	0.0495893	0.789504	0.437769	0.585578
cg02344784	0.0130425	2.48261	0.525373	-0.635085	0.0151788	0.263868	0.280069	0.871115
cg02353184	0.0326634	-2.1362	0.77283	-0.288675	0.0276876	0.946229	0.999969	0.303344
cg02356258	0.0153138	2.42487	0.326348	-0.981495	0.0461524	0.754328	0.434252	0.738385
cg02356381	0.0326634	2.1362	0.563703	0.57735	0.0308762	0.376616	0.680295	0.434133
cg02356917	0.0179263	2.36714	0.165857	-1.38564	0.0091018	0.313896	0.162742	0.86548
cg02358362	0.0209213	2.3094	0.272656	1.09697	0.0439067	0.412147	0.80661	0.515244
cg02361130	0.00791179	2.65581	0.644167	-0.46188	0.0473375	0.865389	0.702634	0.612344
cg02365631	0.0179263	2.36714	0.563703	-0.57735	0.0425507	0.621564	0.47624	0.8801
cg02368877	0.0496472	1.96299	0.204024	-1.27017	0.0261202	0.616545	0.547281	0.673898
cg02369542	0.0496472	-1.96299	0.729034	0.34641	0.0341198	0.443518	0.777094	0.344867
cg02369548	0.0130425	2.48261	0.0734883	-1.78979	0.00645883	0.436668	0.945772	0.341052
cg02371536	0.0282404	2.19393	0.77283	0.288675	0.0476653	0.878886	0.706001	0.915488
cg02372142	0.00665673	-2.71355	0.272656	1.09697	0.0148712	0.53198	0.628006	0.780804
cg02376783	0.00665673	2.71355	0.418923	0.80829	0.00910719	0.897098	0.72045	0.594138
cg02377257	0.0496472	1.96299	0.326348	-0.981495	0.021244	0.231346	0.250221	0.281223
cg02378784	0.00122428	3.23316	0.105969	-1.61658	0.045342	0.997202	0.458174	0.787014
cg02379695	0.0243434	-2.25167	0.225346	-1.21244	0.0295097	0.960622	0.501101	0.454027
cg02381521	0.0130425	-2.48261	0.45292	0.750555	0.0153489	0.656187	0.344444	0.37506
cg02382699	0.0326634	2.1362	1	0	0.014028	0.729694	0.061731	0.770071
cg02384510	0.00791179	2.65581	0.488422	0.69282	0.0237399	0.784243	0.658329	0.828956
cg02384546	0.0496472	1.96299	0.729034	-0.34641	0.0338309	0.357008	0.493756	0.358925
cg02386916	0.0153138	2.42487	0.355611	0.92376	0.0213195	0.602219	0.812701	0.46449
cg02387660	0.0130425	2.48261	0.525373	-0.635085	0.00521875	0.743868	0.110599	0.233258
cg02388537	0.0433081	2.02073	0.817361	0.23094	0.0460797	0.951047	0.746666	0.221106
cg02389281	0.000658337	3.40637	0.77283	-0.288675	0.000454554	0.789784	0.660463	0.274363
cg02390858	0.0209213	2.3094	0.86249	0.173205	0.0152239	0.768349	0.671368	0.344388
cg02393496	0.0130425	2.48261	0.95396	0.057735	0.0171469	0.557112	0.654998	0.410459
cg02396076	0.0326634	2.1362	0.488422	-0.69282	0.0389345	0.832863	0.198353	0.798996
cg02396520	0.0209213	2.3094	0.817361	0.23094	0.0193689	0.618259	0.625038	0.780318
cg02396891	0.0243434	-2.25167	0.644167	-0.46188	0.0111617	0.12589	0.659716	0.945031
cg02402565	0.0209213	2.3094	0.603332	-0.519615	0.00302719	0.691944	0.0616838	0.892215
cg02412314	0.0326634	2.1362	0.326348	-0.981495	0.0482469	0.998228	0.343364	0.644349
cg02414555	0.0376669	2.07846	0.686106	0.404145	0.0394656	0.621462	0.357717	0.815448
cg02414980	0.0282404	-2.19393	0.77283	-0.288675	0.0348683	0.978354	0.398138	0.381316
cg02415020	0.00791179	2.65581	0.355611	0.92376	0.00727597	0.977707	0.142301	0.50848
cg02418535	0.0179263	2.36714	0.0646717	-1.84752	0.0198536	0.690369	0.442771	0.375067
cg02418625	0.0153138	2.42487	0.204024	-1.27017	0.0114003	0.452796	0.245468	0.562233
cg02419627	0.0153138	2.42487	0.729034	-0.34641	0.0221637	0.742023	0.668726	0.517166
cg02420722	0.0376669	2.07846	0.326348	-0.981495	0.037391	0.562672	0.491229	0.348256
cg02420880	0.00791179	2.65581	0.563703	0.57735	0.00543666	0.687267	0.602313	0.267035
cg02421824	0.0153138	2.42487	0.165857	1.38564	0.0448563	0.645438	0.508058	0.612682
cg02426414	0.0209213	2.3094	0.644167	0.46188	0.0271346	0.333888	0.36977	0.260707
cg02426464	0.0179263	2.36714	0.0940686	-1.67432	0.0286101	0.752002	0.664532	0.685964
cg02427830	0.0179263	2.36714	0.729034	-0.34641	0.0258592	0.82262	0.461891	0.395459
cg02433545	0.0326634	2.1362	0.355611	-0.92376	0.0407039	0.978483	0.594447	0.396161
cg02438107	0.0496472	-1.96299	0.488422	-0.69282	0.045132	0.238048	0.925807	0.49216
cg02440736	0.00665673	2.71355	1	0	0.00569016	0.803296	0.682766	0.411082
cg02442436	0.0376669	-2.07846	0.418923	-0.80829	0.042521	0.718965	0.671039	0.74877
cg02443126	0.0326634	2.1362	0.644167	-0.46188	0.0283355	0.475046	0.539577	0.255851
cg02446410	0.0130425	2.48261	0.525373	-0.635085	0.00226385	0.388881	0.308257	0.158698
cg02449762	0.0326634	-2.1362	0.248213	-1.1547	0.0454258	0.67541	0.5144	0.398354
cg02452966	0.0130425	-2.48261	1	0	0.00484565	0.251666	0.360408	0.271479
cg02454750	0.00791179	2.65581	0.603332	-0.519615	0.02402	0.930395	0.473117	0.871153
cg02454806	0.00268017	-3.00222	0.418923	0.80829	0.0228099	0.949435	0.635507	0.955098
cg02456095	0.0433081	2.02073	0.45292	-0.750555	0.0288801	0.476734	0.406668	0.385812
cg02457789	0.00466913	2.82902	0.644167	0.46188	0.0361189	0.883866	0.900383	0.919878
cg02458846	0.00558362	2.77128	0.86249	-0.173205	0.0202973	0.73193	0.346281	0.917702
cg02461863	0.0496472	1.96299	0.686106	-0.404145	0.0453833	0.662805	0.289584	0.649383
cg02461980	0.00937477	2.59808	0.272656	-1.09697	0.0150135	0.742549	0.136642	0.850003
cg02463485	0.0130425	2.48261	0.86249	-0.173205	0.0406048	0.760488	0.473014	0.781909
cg02469356	0.0496472	-1.96299	0.418923	-0.80829	0.045692	0.942091	0.337073	0.544512
cg02470179	0.00665673	2.71355	0.326348	-0.981495	0.0139729	0.694761	0.419968	0.583779
cg02471915	0.0496472	1.96299	0.248213	-1.1547	0.0189442	0.785383	0.215015	0.254788
cg02472646	0.0376669	-2.07846	0.95396	0.057735	0.0335611	0.677174	0.460659	0.76115
cg02473334	0.0153138	2.42487	0.133327	-1.50111	0.0444708	0.369294	0.346173	0.417306
cg02478589	0.0209213	2.3094	0.86249	0.173205	0.0422265	0.925017	0.701592	0.524065
cg02481073	0.0179263	2.36714	0.729034	0.34641	0.0250498	0.881896	0.525473	0.97578
cg02482603	0.0282404	2.19393	0.488422	-0.69282	0.011376	0.296308	0.681049	0.0950897
cg02484676	0.0243434	2.25167	0.525373	-0.635085	0.029082	0.39502	0.908084	0.512547
cg02486268	0.0243434	-2.25167	0.418923	0.80829	0.00818831	0.274426	0.553938	0.146563
cg02486415	0.0209213	2.3094	0.0567468	-1.90526	0.0387895	0.789524	0.577097	0.665759
cg02492907	0.0282404	2.19393	0.386476	-0.866025	0.0406916	0.651137	0.730912	0.803345
cg02497747	0.0209213	2.3094	0.326348	-0.981495	0.00851642	0.917554	0.277554	0.842765
cg02498579	0.0110744	2.54034	0.298698	-1.03923	0.0481976	0.73581	0.707649	0.309032
cg02500392	0.0179263	-2.36714	0.165857	1.38564	0.0109673	0.941691	0.212378	0.57591
cg02505534	0.00937477	-2.59808	0.95396	-0.057735	0.00752007	0.210542	0.843577	0.359529
cg02506694	0.0282404	2.19393	0.729034	0.34641	0.0389888	0.835809	0.620761	0.301122
cg02511456	0.00791179	-2.65581	0.686106	-0.404145	0.0346879	0.912717	0.559706	0.646263
cg02511570	0.0282404	2.19393	0.386476	-0.866025	0.0480826	0.480714	0.459322	0.716503
cg02511845	0.0209213	2.3094	0.248213	-1.1547	0.0274204	0.727967	0.356882	0.558584
cg02512656	0.00149616	3.17543	0.418923	-0.80829	0.0125732	0.953116	0.576585	0.8007
cg02514528	0.0433081	2.02073	0.326348	-0.981495	0.0139854	0.62449	0.249172	0.391739
cg02515161	0.0433081	2.02073	0.45292	0.750555	0.0179103	0.885991	0.632614	0.355518
cg02523978	0.0326634	2.1362	0.563703	-0.57735	0.0287204	0.676784	0.236461	0.423794
cg02524010	0.0376669	2.07846	0.326348	-0.981495	0.0274259	0.812439	0.31397	0.431818
cg02524475	0.0179263	-2.36714	0.418923	-0.80829	0.00427297	0.253175	0.917805	0.135482
cg02527481	0.0496472	-1.96299	0.77283	-0.288675	0.0256123	0.749538	0.36642	0.160167
cg02527881	0.0209213	2.3094	0.184209	-1.32791	0.0423411	0.83728	0.359366	0.50321
cg02535198	0.0209213	2.3094	0.184209	1.32791	0.0206453	0.509342	0.738236	0.524788
cg02540781	0.00558362	2.77128	0.908073	-0.11547	0.00583798	0.266616	0.471761	0.999269
cg02543060	0.0110744	2.54034	0.298698	-1.03923	0.0267226	0.915104	0.224661	0.866592
cg02544453	0.0376669	2.07846	1	0	0.0271101	0.372963	0.250449	0.888587
cg02544485	0.0110744	2.54034	0.95396	-0.057735	0.0122114	0.592069	0.564341	0.441887
cg02545583	0.00791179	2.65581	0.817361	0.23094	0.00619901	0.329425	0.664116	0.416371
cg02546607	0.0326634	2.1362	0.355611	0.92376	0.0172349	0.906539	0.204295	0.956721
cg02546998	0.0326634	2.1362	0.272656	-1.09697	0.0442861	0.899299	0.795033	0.539836
cg02548385	0.0433081	2.02073	0.603332	0.519615	0.0386046	0.796839	0.432225	0.800413
cg02550607	0.00558362	2.77128	0.272656	-1.09697	0.0205499	0.804974	0.443381	0.953376
cg02560265	0.00665673	-2.71355	0.418923	-0.80829	0.0228374	0.780285	0.917159	0.734718
cg02562344	0.0326634	2.1362	0.355611	0.92376	0.0491837	0.648542	0.170476	0.865312
cg02565014	0.00937477	2.59808	0.386476	-0.866025	0.0475594	0.899438	0.627716	0.810603
cg02565062	0.0376669	2.07846	0.95396	0.057735	0.0437454	0.488206	0.278205	0.497809
cg02567476	0.00791179	2.65581	0.686106	0.404145	0.00489679	0.291906	0.864811	0.256157
cg02567505	0.0282404	2.19393	0.77283	-0.288675	0.022666	0.586402	0.153161	0.395915
cg02568311	0.0153138	2.42487	0.86249	-0.173205	0.0296653	0.843393	0.799512	0.589552
cg02568684	0.00389242	2.88675	0.908073	0.11547	0.003795	0.598318	0.825129	0.557532
cg02569142	0.0130425	2.48261	0.326348	-0.981495	0.0265367	0.74408	0.585433	0.672413
cg02569698	0.0433081	-2.02073	0.686106	0.404145	0.0475263	0.696577	0.584265	0.562886
cg02570151	0.0130425	2.48261	0.386476	-0.866025	0.00834232	0.337427	0.0743909	0.83965
cg02570155	0.0496472	1.96299	0.105969	-1.61658	0.0451115	0.389513	0.478689	0.466611
cg02578692	0.0282404	2.19393	0.45292	0.750555	0.0312015	0.737749	0.321969	0.864012
cg02580900	0.00268017	3.00222	0.77283	0.288675	0.0144103	0.74928	0.516796	0.967518
cg02582957	0.0243434	2.25167	0.355611	0.92376	0.0146009	0.863039	0.198955	0.644035
cg02583418	0.0282404	2.19393	0.95396	0.057735	0.0182895	0.637701	0.0956616	0.977107
cg02584678	0.0376669	2.07846	0.563703	-0.57735	0.0364984	0.289033	0.981437	0.567302
cg02584802	0.00389242	2.88675	0.326348	-0.981495	0.00840447	0.911126	0.966288	0.988102
cg02586730	0.0496472	-1.96299	0.603332	0.519615	0.0380115	0.646089	0.757556	0.375766
cg02601352	0.0496472	1.96299	0.77283	0.288675	0.0401148	0.291596	0.573567	0.252579
cg02602411	0.0209213	2.3094	0.0567468	-1.90526	0.0121793	0.975247	0.17803	0.590957
cg02603518	0.0130425	2.48261	0.225346	-1.21244	0.0216778	0.859728	0.618848	0.69565
cg02605601	0.0433081	2.02073	0.817361	-0.23094	0.0242527	0.908816	0.385139	0.279309
cg02605874	0.0433081	2.02073	0.386476	0.866025	0.0354547	0.806716	0.186921	0.722254
cg02606127	0.00122428	3.23316	0.563703	0.57735	0.00300315	0.952735	0.723822	0.668129
cg02606480	0.0326634	2.1362	0.525373	0.635085	0.0052006	0.294826	0.171689	0.402985
cg02610851	0.0282404	-2.19393	1	0	0.0354614	0.544859	0.809893	0.939586
cg02612885	0.000658337	3.40637	0.418923	-0.80829	0.000382196	0.17742	0.272509	0.469963
cg02612925	0.0496472	-1.96299	0.908073	-0.11547	0.0394058	0.881395	0.153445	0.42517
cg02613108	0.0153138	2.42487	0.298698	-1.03923	0.0239304	0.473265	0.730058	0.803616
cg02619205	0.0433081	-2.02073	0.225346	1.21244	0.0496812	0.757939	0.930015	0.247653
cg02623036	0.0209213	2.3094	0.603332	0.519615	0.0356627	0.921976	0.553297	0.313474
cg02624377	0.0153138	2.42487	0.525373	0.635085	0.035958	0.625172	0.858667	0.707381
cg02625749	0.0209213	2.3094	0.817361	-0.23094	0.0147244	0.979845	0.684262	0.315667
cg02631330	0.0496472	-1.96299	0.77283	-0.288675	0.0481718	0.923952	0.241979	0.484288
cg02631767	0.00323491	2.94449	0.817361	-0.23094	0.0152157	0.763412	0.880358	0.662322
cg02632952	0.0209213	2.3094	0.355611	0.92376	0.0400882	0.69949	0.681574	0.544015
cg02641277	0.00558362	2.77128	0.148915	-1.44338	0.00275258	0.714145	0.522966	0.65042
cg02641469	0.0433081	2.02073	0.272656	-1.09697	0.0340857	0.549498	0.40463	0.615067
cg02641636	0.00791179	2.65581	0.204024	1.27017	0.00630268	0.825193	0.934383	0.285634
cg02642126	0.0496472	1.96299	0.817361	-0.23094	0.00978453	0.71239	0.118771	0.270425
cg02642833	0.00937477	2.59808	0.77283	-0.288675	0.0173337	0.96387	0.785242	0.65783
cg02643433	0.0376669	2.07846	0.165857	-1.38564	0.00821612	0.175422	0.141243	0.943971
cg02646235	0.0376669	-2.07846	0.148915	1.44338	0.0160515	0.172977	0.514945	0.76131
cg02648003	0.0153138	-2.42487	0.355611	0.92376	0.0146278	0.568433	0.675028	0.518065
cg02650121	0.0376669	2.07846	0.45292	-0.750555	0.00867786	0.755798	0.308435	0.175743
cg02650127	0.0243434	2.25167	0.248213	1.1547	0.0434575	0.41206	0.349258	0.618038
cg02650667	0.0209213	-2.3094	0.563703	0.57735	0.0168058	0.548421	0.43975	0.575455
cg02650857	0.0153138	2.42487	0.418923	0.80829	0.0372718	0.810646	0.891278	0.572853
cg02654089	0.00558362	2.77128	0.686106	-0.404145	0.0151402	0.894521	0.597457	0.871849
cg02657800	0.00389242	2.88675	0.133327	-1.50111	0.00302754	0.850101	0.200203	0.875564
cg02658543	0.0130425	2.48261	0.326348	0.981495	0.0294929	0.855843	0.878147	0.474934
cg02658962	0.0153138	2.42487	0.298698	-1.03923	0.0178937	0.845839	0.953023	0.26185
cg02660480	0.0496472	-1.96299	0.95396	0.057735	0.0249024	0.994413	0.56662	0.136328
cg02672386	0.00323491	2.94449	0.86249	0.173205	0.0042665	0.654524	0.876752	0.691671
cg02674179	0.0282404	-2.19393	0.686106	0.404145	0.0386285	0.793453	0.563295	0.602864
cg02675466	0.00323491	2.94449	0.817361	-0.23094	0.00275651	0.960653	0.308189	0.902944
cg02676170	0.0179263	2.36714	0.77283	0.288675	0.0372428	0.512507	0.435684	0.749298
cg02678243	0.00791179	-2.65581	0.418923	0.80829	0.00701072	0.364712	0.740715	0.708029
cg02678971	0.0282404	2.19393	1	0	0.0194086	0.680438	0.673073	0.659512
cg02681482	0.000658337	3.40637	0.418923	-0.80829	0.00172533	0.474053	0.630095	0.94502
cg02684464	0.0209213	2.3094	0.165857	-1.38564	0.0139188	0.967347	0.588971	0.213724
cg02685016	0.0326634	-2.1362	0.95396	0.057735	0.0420459	0.571958	0.526425	0.483941
cg02685035	0.0243434	2.25167	0.686106	0.404145	0.0281086	0.832653	0.577403	0.636103
cg02685931	0.0326634	2.1362	0.817361	0.23094	0.0298164	0.505552	0.296036	0.475405
cg02694972	0.0376669	2.07846	0.45292	0.750555	0.0121432	0.475818	0.149104	0.917257
cg02697717	0.0209213	-2.3094	0.525373	0.635085	0.0427798	0.659708	0.502646	0.74995
cg02703116	0.0376669	2.07846	0.95396	-0.057735	0.0296121	0.527745	0.202554	0.408977
cg02707048	0.0243434	2.25167	0.105969	-1.61658	0.0459595	0.965796	0.585346	0.609742
cg02708984	0.0243434	2.25167	0.77283	0.288675	0.0157686	0.866179	0.168741	0.785843
cg02709139	0.0326634	2.1362	0.95396	-0.057735	0.0133647	0.379562	0.144331	0.498749
cg02710694	0.0433081	2.02073	0.204024	-1.27017	0.0308918	0.673615	0.272257	0.874912
cg02714988	0.0326634	-2.1362	0.95396	0.057735	0.0245245	0.858093	0.190263	0.958971
cg02715602	0.0326634	2.1362	0.119033	-1.55885	0.0178743	0.867032	0.213552	0.895328
cg02717337	0.0243434	-2.25167	0.386476	-0.866025	0.0150685	0.549355	0.955973	0.135004
cg02718825	0.0326634	-2.1362	0.298698	1.03923	0.0314146	0.234193	0.546623	0.749066
cg02720155	0.00665673	2.71355	0.225346	-1.21244	0.0119014	0.856512	0.407535	0.643351
cg02723395	0.0209213	-2.3094	0.644167	0.46188	0.0139208	0.679009	0.43002	0.47464
cg02726615	0.0326634	2.1362	0.386476	-0.866025	0.0366828	0.410429	0.890587	0.54153
cg02733127	0.0376669	2.07846	0.326348	-0.981495	0.0371834	0.620438	0.366237	0.696443
cg02734661	0.0153138	-2.42487	1	0	0.037134	0.62271	0.594321	0.829098
cg02737517	0.0326634	2.1362	0.272656	-1.09697	0.0251525	0.769638	0.162137	0.922375
cg02739040	0.0179263	-2.36714	0.644167	0.46188	0.0438622	0.616296	0.672966	0.469425
cg02740007	0.0282404	-2.19393	0.817361	0.23094	0.0406292	0.484623	0.653883	0.62737
cg02740627	0.0209213	2.3094	0.272656	-1.09697	0.0191307	0.575338	0.901565	0.203332
cg02740714	0.0209213	2.3094	0.95396	-0.057735	0.033786	0.82455	0.963187	0.413098
cg02741698	0.0376669	2.07846	0.386476	-0.866025	0.0157149	0.43153	0.875792	0.2283
cg02747057	0.0326634	-2.1362	0.248213	1.1547	0.0146077	0.325813	0.802461	0.125699
cg02748424	0.00466913	2.82902	0.686106	-0.404145	0.00457357	0.482595	0.509185	0.561588
cg02749265	0.00323491	-2.94449	0.908073	0.11547	0.045945	0.996524	0.503743	0.736831
cg02751695	0.0130425	2.48261	0.563703	0.57735	0.00689697	0.271295	0.922453	0.815182
cg02755506	0.0282404	2.19393	0.686106	-0.404145	0.040618	0.796701	0.818402	0.507029
cg02756652	0.0153138	2.42487	0.95396	0.057735	0.0212468	0.742492	0.340128	0.593714
cg02757223	0.00221369	3.05996	0.95396	-0.057735	0.0099622	0.637306	0.677739	0.936143
cg02758247	0.0243434	-2.25167	1	0	0.0149624	0.232513	0.267345	0.252667
cg02759713	0.0209213	2.3094	0.386476	0.866025	0.0173383	0.688938	0.408163	0.592825
cg02759779	0.0209213	-2.3094	0.248213	1.1547	0.017428	0.271481	0.485108	0.1971
cg02767146	0.0433081	2.02073	0.77283	-0.288675	0.0263214	0.654882	0.135092	0.70587
cg02767382	0.0130425	-2.48261	0.119033	1.55885	0.00512791	0.955258	0.796463	0.10355
cg02767960	0.0243434	2.25167	0.729034	-0.34641	0.00762639	0.419287	0.0996116	0.56197
cg02768583	0.0376669	-2.07846	0.86249	0.173205	0.0240541	0.384218	0.335558	0.372006
cg02768760	0.0496472	1.96299	0.95396	-0.057735	0.0498394	0.995111	0.35559	0.833687
cg02770672	0.00268017	-3.00222	0.95396	0.057735	0.00181715	0.422369	0.471966	0.50477
cg02771489	0.0130425	2.48261	0.45292	0.750555	0.0107848	0.838879	0.910407	0.26161
cg02773436	0.0282404	2.19393	0.77283	-0.288675	0.0305571	0.754938	0.68999	0.275824
cg02775131	0.0153138	2.42487	0.204024	-1.27017	0.0340496	0.396539	0.59829	0.602497
cg02777191	0.00268017	3.00222	0.326348	-0.981495	0.0160966	0.888553	0.398063	0.886425
cg02780210	0.0376669	-2.07846	0.686106	0.404145	0.0413927	0.681551	0.728331	0.477071
cg02782331	0.00466913	2.82902	0.488422	-0.69282	0.00658434	0.868565	0.323003	0.714842
cg02785000	0.0110744	-2.54034	0.204024	1.27017	0.00279153	0.754081	0.051998	0.572751
cg02785650	0.00558362	2.77128	0.119033	-1.55885	0.0209828	0.782334	0.394024	0.607611
cg02788177	0.0496472	-1.96299	0.729034	0.34641	0.0493798	0.322148	0.635401	0.440579
cg02789072	0.0282404	2.19393	0.77283	-0.288675	0.0171854	0.652409	0.875598	0.184032
cg02790305	0.0130425	-2.48261	0.298698	1.03923	0.0274734	0.959022	0.549857	0.230732
cg02792333	0.0433081	2.02073	0.95396	-0.057735	0.0470675	0.726773	0.565129	0.432151
cg02792821	0.00937477	2.59808	1	0	0.00387729	0.903809	0.219406	0.228725
cg02797907	0.0130425	2.48261	0.563703	-0.57735	0.0299862	0.408846	0.729076	0.35916
cg02799324	0.0376669	2.07846	0.644167	-0.46188	0.0405693	0.745226	0.388701	0.466525
cg02801786	0.0243434	-2.25167	0.86249	-0.173205	0.0394526	0.763782	0.770712	0.19532
cg02805188	0.0282404	2.19393	0.45292	-0.750555	0.0444724	0.717828	0.999154	0.976798
cg02808366	0.00558362	2.77128	0.817361	-0.23094	0.0295674	0.559716	0.428624	0.799842
cg02813550	0.0179263	2.36714	0.525373	-0.635085	0.0250172	0.681417	0.811641	0.707355
cg02816049	0.0433081	-2.02073	0.184209	1.32791	0.044196	0.858886	0.704188	0.386089
cg02821166	0.0496472	1.96299	0.418923	-0.80829	0.0473463	0.992587	0.417028	0.720802
cg02821261	0.0433081	2.02073	0.488422	-0.69282	0.0379168	0.897949	0.316201	0.714214
cg02822958	0.0243434	-2.25167	0.119033	-1.55885	0.0465197	0.290088	0.427885	0.587418
cg02823332	0.0496472	-1.96299	0.225346	1.21244	0.0213951	0.992865	0.250297	0.738203
cg02824489	0.0179263	2.36714	0.729034	-0.34641	0.0104447	0.325493	0.484238	0.938321
cg02825483	0.00665673	-2.71355	0.644167	0.46188	0.0318156	0.886766	0.436654	0.704859
cg02826233	0.0243434	2.25167	0.77283	0.288675	0.0120132	0.816728	0.637601	0.242982
cg02828203	0.0243434	-2.25167	0.355611	-0.92376	0.0330914	0.863824	0.650442	0.265618
cg02829368	0.0179263	2.36714	0.418923	-0.80829	0.0267113	0.278112	0.287275	0.666212
cg02833471	0.0282404	-2.19393	0.908073	0.11547	0.0114248	0.305213	0.196329	0.261991
cg02835117	0.00665673	2.71355	0.86249	0.173205	0.0100788	0.843509	0.993807	0.363019
cg02835823	0.0433081	2.02073	0.298698	-1.03923	0.0483268	0.459807	0.842101	0.606864
cg02836923	0.0130425	2.48261	0.326348	-0.981495	0.028709	0.624202	0.752902	0.320429
cg02838038	0.00791179	2.65581	0.95396	-0.057735	0.0048041	0.807377	0.268916	0.696844
cg02838683	0.0209213	2.3094	0.525373	-0.635085	0.0329805	0.882302	0.341287	0.735673
cg02851558	0.0282404	-2.19393	0.908073	0.11547	0.0216956	0.272646	0.5058	0.390755
cg02852847	0.0496472	1.96299	0.272656	-1.09697	0.0294783	0.894287	0.552466	0.917849
cg02854730	0.00389242	2.88675	0.133327	1.50111	0.00330898	0.783122	0.445465	0.326261
cg02855740	0.0433081	-2.02073	0.908073	0.11547	0.025123	0.542619	0.251317	0.405993
cg02856688	0.0282404	-2.19393	0.248213	1.1547	0.0277207	0.316369	0.610411	0.550409
cg02857166	0.0496472	-1.96299	0.386476	-0.866025	0.0258683	0.632183	0.931437	0.255913
cg02860807	0.0433081	2.02073	0.165857	-1.38564	0.0287621	0.391006	0.165431	0.51299
cg02864619	0.00937477	2.59808	0.119033	-1.55885	0.0290259	0.929096	0.572786	0.537725
cg02865068	0.0433081	-2.02073	0.86249	0.173205	0.0410277	0.520957	0.519712	0.340539
cg02865230	0.00558362	2.77128	0.686106	-0.404145	0.00641763	0.355703	0.864543	0.957103
cg02868001	0.0209213	2.3094	0.165857	-1.38564	0.0168749	0.845689	0.381173	0.508006
cg02871300	0.0209213	2.3094	0.95396	0.057735	0.0367712	0.626039	0.483983	0.708858
cg02873783	0.0243434	-2.25167	0.225346	-1.21244	0.00220419	0.284053	0.475088	0.0532467
cg02877240	0.0209213	2.3094	0.105969	-1.61658	0.0050385	0.371453	0.963087	0.0836807
cg02877417	0.000998686	3.2909	0.298698	-1.03923	0.00061822	0.979943	0.283325	0.799808
cg02878367	0.0282404	2.19393	0.908073	0.11547	0.0098994	0.368144	0.393576	0.2135
cg02878439	0.0433081	-2.02073	0.563703	-0.57735	0.0387841	0.650834	0.519933	0.539059
cg02878510	0.0110744	2.54034	0.45292	-0.750555	0.0249029	0.78557	0.714358	0.895702
cg02879960	0.0243434	2.25167	0.148915	-1.44338	0.0362619	0.920643	0.259893	0.776165
cg02880125	0.0179263	2.36714	0.908073	0.11547	0.0266938	0.802172	0.402502	0.568186
cg02881230	0.0153138	2.42487	0.105969	-1.61658	0.0310076	0.972363	0.149885	0.846247
cg02881893	0.0376669	2.07846	0.525373	-0.635085	0.0231896	0.395923	0.34248	0.387637
cg02884773	0.0376669	-2.07846	0.77283	0.288675	0.00720788	0.329231	0.410463	0.301765
cg02887514	0.0376669	-2.07846	0.86249	0.173205	0.00920397	0.9548	0.303226	0.176987
cg02889469	0.0209213	2.3094	0.148915	-1.44338	0.0251073	0.688376	0.498168	0.648868
cg02889617	0.00791179	2.65581	0.563703	-0.57735	0.0132988	0.805559	0.237148	0.945969
cg02890194	0.0179263	-2.36714	0.77283	0.288675	0.0272054	0.919006	0.81076	0.297827
cg02892439	0.0110744	2.54034	0.95396	-0.057735	0.0404825	0.760562	0.525601	0.315623
cg02892925	0.0496472	-1.96299	0.908073	-0.11547	0.0352757	0.564652	0.566093	0.277375
cg02893550	0.00323491	2.94449	0.817361	-0.23094	0.037837	0.941727	0.388057	0.996839
cg02894485	0.0130425	2.48261	0.729034	-0.34641	0.0303706	0.519422	0.358658	0.816356
cg02897018	0.00558362	2.77128	0.525373	-0.635085	0.019998	0.432071	0.314378	0.514092
cg02897172	0.0209213	-2.3094	0.644167	-0.46188	0.0106785	0.626964	0.74795	0.166873
cg02899011	0.0326634	2.1362	0.86249	-0.173205	0.0256657	0.761051	0.669112	0.172698
cg02899559	0.00268017	-3.00222	0.686106	0.404145	0.0143741	0.787438	0.828943	0.661892
cg02901728	0.0243434	-2.25167	0.204024	1.27017	0.019134	0.924975	0.659577	0.403909
cg02903852	0.0209213	-2.3094	0.184209	-1.32791	0.00380935	0.749919	0.258054	0.227909
cg02907402	0.000998686	3.2909	0.119033	-1.55885	0.000333775	0.455565	0.340717	0.227652
cg02911151	0.00791179	2.65581	0.817361	-0.23094	0.0443359	0.966223	0.965602	0.807068
cg02913140	0.0496472	1.96299	0.386476	0.866025	0.0275666	0.526108	0.995679	0.27359
cg02916763	0.0433081	2.02073	0.729034	0.34641	0.0430241	0.73515	0.784248	0.406001
cg02918678	0.0153138	2.42487	0.686106	-0.404145	0.0175292	0.797037	0.41463	0.450046
cg02920954	0.0179263	2.36714	0.386476	-0.866025	0.0319724	0.472038	0.570639	0.690595
cg02923856	0.0110744	2.54034	0.729034	-0.34641	0.0228949	0.683691	0.618681	0.92122
cg02925295	0.0282404	2.19393	0.204024	-1.27017	0.0344637	0.842277	0.644906	0.219918
cg02932600	0.0153138	-2.42487	0.418923	0.80829	0.0392917	0.693923	0.541466	0.422343
cg02933141	0.00466913	2.82902	0.204024	-1.27017	0.00705275	0.483294	0.379121	0.720614
cg02937179	0.00323491	-2.94449	0.355611	-0.92376	0.0217729	0.905001	0.445722	0.475511
cg02940093	0.0282404	2.19393	0.686106	-0.404145	0.0465264	0.925913	0.681614	0.470588
cg02940693	0.0130425	2.48261	0.644167	-0.46188	0.0475407	0.925796	0.579709	0.832795
cg02942591	0.00149616	3.17543	0.184209	1.32791	0.00325227	0.87971	0.938902	0.890914
cg02944123	0.0243434	2.25167	0.165857	-1.38564	0.0338203	0.711028	0.865551	0.429639
cg02945587	0.00665673	-2.71355	0.77283	0.288675	0.00514491	0.628698	0.981635	0.165384
cg02948264	0.0243434	-2.25167	0.908073	-0.11547	0.041297	0.927221	0.873705	0.720401
cg02948624	0.000219851	3.69504	0.644167	-0.46188	0.000189377	0.389252	0.257228	0.918621
cg02955259	0.0433081	2.02073	0.488422	-0.69282	0.0280498	0.979693	0.257717	0.524068
cg02955839	0.0433081	2.02073	0.817361	0.23094	0.022171	0.332711	0.958602	0.109844
cg02956042	0.0282404	2.19393	0.272656	1.09697	0.0446041	0.86483	0.784089	0.583887
cg02957305	0.0433081	2.02073	0.729034	-0.34641	0.0415817	0.701296	0.256992	0.687189
cg02958346	0.0376669	-2.07846	0.95396	-0.057735	0.0294292	0.396463	0.536452	0.354464
cg02959108	0.0376669	-2.07846	0.119033	1.55885	0.0465446	0.945207	0.768786	0.339084
cg02960977	0.0153138	-2.42487	0.133327	1.50111	0.0278523	0.655017	0.544618	0.379123
cg02961557	0.0326634	-2.1362	0.86249	-0.173205	0.0190796	0.73238	0.143011	0.885111
cg02962107	0.0179263	2.36714	0.644167	0.46188	0.0274615	0.937178	0.631758	0.717984
cg02965526	0.00665673	2.71355	0.298698	1.03923	0.0427513	0.88677	0.786372	0.978345
cg02966404	0.000428568	3.52184	0.298698	-1.03923	5.64595e-05	0.229423	0.305926	0.474505
cg02969380	0.0179263	2.36714	0.77283	-0.288675	0.0346944	0.824557	0.625612	0.766958
cg02975386	0.000812117	3.34863	0.563703	-0.57735	0.000742419	0.660368	0.620505	0.717063
cg02975882	0.0326634	2.1362	0.418923	-0.80829	0.0229141	0.817304	0.566228	0.638425
cg02978544	0.00389242	2.88675	0.148915	-1.44338	0.00140224	0.344112	0.250015	0.188863
cg02980023	0.00558362	-2.77128	1	0	0.0253711	0.846717	0.42949	0.751176
cg02981992	0.0433081	2.02073	0.133327	-1.50111	0.0191083	0.953152	0.272807	0.25875
cg02989264	0.0282404	-2.19393	0.729034	0.34641	0.0350428	0.485049	0.419224	0.884041
cg02991474	0.0433081	-2.02073	0.355611	0.92376	0.0311329	0.678046	0.257132	0.701621
cg02992647	0.000998686	3.2909	0.603332	-0.519615	0.00446327	0.917058	0.818433	0.545085
cg02992705	0.0179263	-2.36714	0.525373	-0.635085	0.0458032	0.564833	0.677027	0.34703
cg02995584	0.0282404	2.19393	0.0832645	-1.73205	0.0482112	0.857654	0.607344	0.747115
cg02995952	0.0179263	2.36714	0.95396	-0.057735	0.0287976	0.772528	0.789503	0.30568
cg02997409	0.0243434	2.25167	0.644167	-0.46188	0.0367666	0.668735	0.161403	0.916857
cg02999495	0.0130425	-2.48261	0.603332	-0.519615	0.0129561	0.731627	0.759325	0.201024
cg02999696	0.0209213	-2.3094	0.817361	-0.23094	0.046231	0.571188	0.773757	0.711982
cg03004350	0.00937477	2.59808	0.204024	-1.27017	0.0195713	0.896732	0.17469	0.747408
cg03006983	0.0153138	-2.42487	0.248213	-1.1547	0.00870059	0.30528	0.767413	0.274286
cg03007239	0.0376669	2.07846	0.248213	-1.1547	0.0427362	0.677722	0.284409	0.540705
cg03020526	0.0209213	2.3094	0.86249	0.173205	0.0275737	0.94636	0.596922	0.776396
cg03022050	0.0496472	1.96299	0.119033	-1.55885	0.0196383	0.751304	0.186602	0.406633
cg03024979	0.0209213	2.3094	0.204024	-1.27017	0.0395937	0.713334	0.511862	0.616946
cg03030858	0.00323491	2.94449	0.86249	-0.173205	0.0383787	0.79883	0.328173	0.94999
cg03031933	0.0496472	-1.96299	0.644167	0.46188	0.0164338	0.495495	0.119384	0.92588
cg03036793	0.00466913	2.82902	0.525373	0.635085	0.00697628	0.640334	0.626143	0.519565
cg03037039	0.0243434	-2.25167	0.603332	-0.519615	0.0465607	0.416391	0.416046	0.395913
cg03037974	0.0110744	2.54034	0.644167	-0.46188	0.00404071	0.124779	0.226451	0.229009
cg03043406	0.0433081	2.02073	0.0940686	-1.67432	0.0361828	0.463865	0.304362	0.443361
cg03046204	0.00323491	2.94449	0.603332	-0.519615	0.0124929	0.876036	0.61421	0.828696
cg03046465	0.0153138	2.42487	0.272656	-1.09697	0.0158819	0.362551	0.314523	0.922855
cg03052837	0.00791179	2.65581	0.77283	-0.288675	0.0231801	0.829532	0.586654	0.811399
cg03054529	0.0282404	-2.19393	0.563703	0.57735	0.0354652	0.518157	0.291841	0.678159
cg03061352	0.0376669	-2.07846	0.119033	-1.55885	0.0491929	0.460724	0.389513	0.527845
cg03062768	0.0243434	2.25167	0.644167	-0.46188	0.0200555	0.674298	0.695509	0.625135
cg03062818	0.0326634	2.1362	0.418923	-0.80829	0.019047	0.396633	0.863841	0.250662
cg03069432	0.0110744	2.54034	0.686106	-0.404145	0.0179957	0.381782	0.553855	0.238304
cg03069764	0.0433081	2.02073	0.248213	1.1547	0.0423109	0.572305	0.431111	0.581073
cg03070780	0.00665673	2.71355	0.248213	-1.1547	0.0322182	0.956375	0.901745	0.71613
cg03079219	0.0179263	2.36714	0.165857	-1.38564	0.0252318	0.32759	0.618736	0.503287
cg03079839	0.0282404	2.19393	0.272656	-1.09697	0.0067816	0.162354	0.532465	0.213251
cg03082953	0.00937477	2.59808	0.225346	-1.21244	0.00354824	0.313901	0.212588	0.759444
cg03088599	0.00558362	2.77128	0.603332	-0.519615	0.0132479	0.997243	0.900407	0.277041
cg03089468	0.0282404	2.19393	0.644167	0.46188	0.0464121	0.335352	0.719998	0.769534
cg03093525	0.0326634	-2.1362	0.133327	1.50111	0.0473036	0.494997	0.265911	0.651218
cg03094428	0.0376669	-2.07846	0.326348	0.981495	0.0226976	0.335242	0.800191	0.212065
cg03095028	0.0130425	2.48261	1	0	0.024603	0.808829	0.521835	0.719233
cg03096107	0.0153138	2.42487	0.0832645	-1.73205	0.00956539	0.491634	0.298095	0.684247
cg03096511	0.0243434	2.25167	0.133327	1.50111	0.0300223	0.821788	0.631604	0.429442
cg03103023	0.00665673	2.71355	0.326348	-0.981495	0.0448868	0.878453	0.35857	0.995753
cg03104352	0.0282404	2.19393	0.525373	-0.635085	0.0417038	0.391335	0.584327	0.464496
cg03104936	0.0110744	2.54034	0.326348	-0.981495	0.00707891	0.409058	0.885086	0.16468
cg03107434	0.0326634	2.1362	0.0940686	-1.67432	0.0392752	0.760259	0.153135	0.931357
cg03115530	0.0376669	-2.07846	0.95396	0.057735	0.0181666	0.440533	0.628165	0.866044
cg03116303	0.0153138	2.42487	0.225346	-1.21244	0.0162722	0.427067	0.406859	0.612892
cg03119829	0.0110744	2.54034	0.225346	1.21244	0.0370093	0.555775	0.866948	0.738104
cg03126946	0.00937477	-2.59808	0.0940686	1.67432	0.00485	0.586708	0.867905	0.248287
cg03127440	0.00466913	2.82902	0.0940686	-1.67432	0.00588067	0.352838	0.317157	0.684421
cg03130530	0.00791179	2.65581	0.686106	0.404145	0.0201961	0.924176	0.375036	0.708484
cg03130560	0.0209213	-2.3094	0.355611	0.92376	0.030868	0.609292	0.355378	0.650117
cg03132185	0.0243434	2.25167	0.563703	-0.57735	0.0183996	0.858372	0.248942	0.987068
cg03132203	0.0376669	2.07846	0.686106	-0.404145	0.0465866	0.954626	0.853577	0.201011
cg03139260	0.00937477	2.59808	0.86249	-0.173205	0.0147031	0.636063	0.570865	0.533498
cg03139519	0.0433081	-2.02073	0.488422	0.69282	0.0393101	0.834075	0.276608	0.524883
cg03141845	0.0209213	2.3094	0.77283	-0.288675	0.0148348	0.798355	0.182299	0.776716
cg03142551	0.0153138	2.42487	0.133327	1.50111	0.0166757	0.545827	0.629243	0.48366
cg03145200	0.0153138	2.42487	0.95396	0.057735	0.034548	0.628552	0.47742	0.366368
cg03145386	0.0326634	2.1362	0.119033	-1.55885	0.0326231	0.723263	0.585395	0.567088
cg03146196	0.0326634	2.1362	0.119033	-1.55885	0.00462344	0.296642	0.609765	0.0877864
cg03146671	0.0243434	2.25167	0.488422	0.69282	0.0234234	0.955891	0.617776	0.410986
cg03149343	0.0153138	2.42487	0.225346	-1.21244	0.00227528	0.10563	0.201091	0.301852
cg03150082	0.0130425	2.48261	0.386476	-0.866025	0.0305661	0.742684	0.93704	0.556259
cg03151025	0.00558362	-2.77128	0.95396	-0.057735	0.00771664	0.291068	0.840955	0.800592
cg03151583	0.00221369	3.05996	0.133327	-1.50111	0.00298056	0.230473	0.865306	0.485807
cg03152480	0.0179263	2.36714	0.119033	1.55885	0.0439779	0.713019	0.690092	0.921805
cg03155767	0.0209213	2.3094	0.488422	0.69282	0.0368497	0.772643	0.652141	0.581199
cg03157512	0.0496472	-1.96299	0.603332	-0.519615	0.0107568	0.216722	0.0867988	0.262542
cg03159960	0.0209213	2.3094	0.77283	0.288675	0.0410241	0.803597	0.776729	0.572231
cg03161886	0.0243434	2.25167	0.184209	-1.32791	0.0232477	0.595332	0.355572	0.589834
cg03165951	0.0153138	-2.42487	0.603332	-0.519615	0.0204131	0.74906	0.530789	0.56852
cg03167320	0.0282404	2.19393	0.355611	0.92376	0.0497605	0.665714	0.473375	0.919841
cg03171659	0.0130425	2.48261	0.86249	-0.173205	0.0258213	0.97099	0.47383	0.664132
cg03173367	0.0433081	-2.02073	0.298698	-1.03923	0.0309387	0.588183	0.569702	0.435459
cg03173631	0.0243434	2.25167	0.525373	0.635085	0.0234507	0.734437	0.443133	0.778788
cg03175132	0.0243434	-2.25167	0.603332	-0.519615	0.0474254	0.979743	0.63336	0.474601
cg03179438	0.0110744	2.54034	0.525373	-0.635085	0.0147561	0.820193	0.280218	0.931233
cg03183201	0.0209213	2.3094	0.95396	0.057735	0.0184351	0.921647	0.666379	0.270009
cg03186727	0.0433081	2.02073	0.45292	0.750555	0.0431432	0.656874	0.772702	0.65724
cg03187668	0.0130425	2.48261	0.248213	-1.1547	0.00403207	0.532626	0.342757	0.776837
cg03188000	0.0209213	-2.3094	0.133327	1.50111	0.0141316	0.143779	0.183277	0.47828
cg03188064	0.00149616	-3.17543	0.686106	0.404145	0.0032731	0.411336	0.947735	0.307266
cg03188522	0.0433081	2.02073	0.686106	-0.404145	0.0404685	0.830722	0.308384	0.551346
cg03190578	0.00665673	2.71355	0.817361	0.23094	0.00317934	0.36111	0.451969	0.1706
cg03192598	0.00937477	2.59808	0.165857	-1.38564	0.0156149	0.994046	0.273025	0.845766
cg03192737	0.0153138	2.42487	0.119033	-1.55885	0.0265081	0.734813	0.531844	0.997816
cg03194122	0.0153138	2.42487	0.248213	-1.1547	0.0186727	0.706669	0.270666	0.587845
cg03196623	0.00466913	2.82902	0.729034	0.34641	0.00282109	0.774693	0.182614	0.149736
cg03197885	0.0243434	2.25167	0.0567468	1.90526	0.0445799	0.842937	0.902161	0.658723
cg03198213	0.0110744	2.54034	0.204024	1.27017	0.0278577	0.820146	0.844832	0.912046
cg03198741	0.0433081	2.02073	0.488422	-0.69282	0.0397599	0.884591	0.680791	0.367039
cg03199330	0.0326634	-2.1362	0.298698	1.03923	0.0176103	0.330834	0.555976	0.277031
cg03202804	0.0376669	-2.07846	0.248213	1.1547	0.0409111	0.395034	0.929608	0.435201
cg03203797	0.0433081	2.02073	0.77283	-0.288675	0.0334786	0.457041	0.649997	0.166186
cg03211964	0.00389242	2.88675	0.488422	-0.69282	0.00232704	0.173459	0.22088	0.576231
cg03216557	0.0130425	2.48261	0.298698	1.03923	0.0244999	0.33752	0.986664	0.599985
cg03217568	0.0130425	2.48261	0.133327	-1.50111	0.00983764	0.660872	0.345346	0.442359
cg03221819	0.0433081	-2.02073	0.686106	0.404145	0.0338512	0.9963	0.287168	0.720083
cg03222222	0.0153138	-2.42487	0.355611	-0.92376	0.0228701	0.913364	0.375329	0.485214
cg03224013	0.0153138	2.42487	0.686106	-0.404145	0.047353	0.872128	0.383192	0.667547
cg03224685	0.0209213	2.3094	0.644167	-0.46188	0.0283447	0.403757	0.620471	0.764376
cg03225664	0.0179263	2.36714	0.86249	0.173205	0.0382807	0.578419	0.936106	0.327727
cg03225882	0.0282404	2.19393	0.729034	-0.34641	0.0304011	0.744699	0.384248	0.596336
cg03228292	0.0130425	2.48261	0.908073	-0.11547	0.0217553	0.854337	0.700385	0.816868
cg03228773	0.0326634	-2.1362	0.603332	0.519615	0.035828	0.227294	0.319655	0.346956
cg03230759	0.0243434	2.25167	0.817361	-0.23094	0.0415234	0.588442	0.609003	0.850857
cg03237828	0.0179263	2.36714	0.133327	1.50111	0.012784	0.746486	0.794388	0.930809
cg03239645	0.0326634	2.1362	0.563703	-0.57735	0.0326993	0.661658	0.529804	0.381344
cg03249011	0.0179263	-2.36714	0.95396	-0.057735	0.0452366	0.923509	0.83436	0.639097
cg03258618	0.00791179	2.65581	0.95396	0.057735	0.0244057	0.996252	0.597358	0.832476
cg03258749	0.00466913	2.82902	0.225346	-1.21244	0.0132745	0.554466	0.320377	0.615907
cg03259564	0.0326634	2.1362	0.0734883	-1.78979	0.0413526	0.998389	0.23621	0.725337
cg03260765	0.00558362	-2.77128	0.105969	-1.61658	0.00431217	0.533641	0.318238	0.554848
cg03261737	0.0209213	-2.3094	0.908073	-0.11547	0.00545109	0.188235	0.137401	0.67185
cg03265074	0.0433081	-2.02073	0.45292	0.750555	0.039789	0.441707	0.679047	0.881024
cg03266780	0.0433081	2.02073	0.248213	1.1547	0.0384127	0.756295	0.867602	0.304691
cg03274368	0.0153138	2.42487	0.563703	-0.57735	0.0368255	0.862038	0.801672	0.909217
cg03276323	0.0282404	2.19393	0.148915	-1.44338	0.0160597	0.502155	0.154911	0.957946
cg03280270	0.0376669	2.07846	0.95396	0.057735	0.0332717	0.303509	0.636788	0.74944
cg03280530	0.0243434	-2.25167	0.95396	-0.057735	0.0119185	0.349057	0.668666	0.24633
cg03280812	0.00937477	2.59808	0.355611	-0.92376	0.00875921	0.266838	0.995448	0.733073
cg03282926	0.0496472	1.96299	0.95396	0.057735	0.0287802	0.340698	0.205902	0.266112
cg03282968	0.0376669	2.07846	0.133327	-1.50111	0.0369138	0.741919	0.308806	0.792185
cg03284678	0.0496472	1.96299	0.817361	0.23094	0.0340314	0.738463	0.364373	0.475932
cg03287108	0.0179263	-2.36714	0.326348	-0.981495	0.0284586	0.338573	0.684062	0.429438
cg03287198	0.00323491	-2.94449	0.563703	0.57735	0.0447453	0.953268	0.353963	0.799557
cg03287936	0.0326634	2.1362	0.77283	0.288675	0.0329647	0.894581	0.545436	0.442958
cg03288653	0.0209213	-2.3094	0.77283	-0.288675	0.0159654	0.867352	0.881347	0.109426
cg03294925	0.00268017	-3.00222	1	0	0.00213309	0.195955	0.766651	0.281385
cg03295596	0.0282404	-2.19393	0.133327	1.50111	0.00702271	0.2298	0.292546	0.294748
cg03296524	0.0282404	2.19393	0.729034	-0.34641	0.0266121	0.505201	0.464144	0.982723
cg03299475	0.00323491	2.94449	0.817361	0.23094	0.0184874	0.802942	0.42094	0.682226
cg03301339	0.00268017	3.00222	0.225346	1.21244	0.00246258	0.500979	0.272287	0.639814
cg03307177	0.0209213	-2.3094	0.45292	0.750555	0.0323087	0.782254	0.702156	0.729055
cg03308652	0.0110744	-2.54034	0.77283	-0.288675	0.0460875	0.853253	0.390314	0.756762
cg03311605	0.0243434	2.25167	0.248213	-1.1547	0.0195714	0.345444	0.300415	0.924136
cg03314633	0.00389242	2.88675	0.86249	-0.173205	0.00403167	0.61189	0.779755	0.654932
cg03316614	0.00937477	2.59808	0.603332	0.519615	0.00671906	0.403926	0.437677	0.282434
cg03317451	0.0209213	2.3094	0.184209	-1.32791	0.0321924	0.618943	0.390067	0.640537
cg03317505	0.00389242	-2.88675	0.817361	0.23094	0.0444041	0.992961	0.570845	0.787257
cg03319208	0.0130425	2.48261	1	0	0.0270535	0.903902	0.941275	0.544939
cg03321133	0.0130425	-2.48261	1	0	0.0100959	0.185398	0.439986	0.513034
cg03322262	0.0326634	2.1362	0.298698	-1.03923	0.0204541	0.284075	0.531798	0.203925
cg03326609	0.0153138	-2.42487	0.95396	-0.057735	0.00361825	0.0900624	0.119964	0.948486
cg03331715	0.0130425	2.48261	0.729034	-0.34641	0.018113	0.483376	0.665352	0.543795
cg03332109	0.0243434	2.25167	0.817361	-0.23094	0.0142011	0.442097	0.341279	0.580666
cg03333699	0.0110744	2.54034	0.355611	-0.92376	0.0281156	0.928113	0.399378	0.856138
cg03334076	0.0326634	2.1362	0.386476	-0.866025	0.016293	0.573685	0.541974	0.490516
cg03336270	0.0110744	-2.54034	0.77283	-0.288675	0.0132775	0.443982	0.258448	0.768044
cg03338298	0.0179263	2.36714	0.248213	-1.1547	0.0388572	0.917288	0.387507	0.900389
cg03339725	0.0496472	1.96299	0.386476	0.866025	0.0489649	0.446031	0.265478	0.647495
cg03340148	0.0433081	2.02073	0.45292	-0.750555	0.0287019	0.215944	0.626763	0.463281
cg03340228	0.00182274	3.11769	0.165857	-1.38564	0.00538427	0.873911	0.499459	0.759485
cg03340356	0.00937477	2.59808	0.418923	-0.80829	0.0346534	0.745434	0.408156	0.894775
cg03340760	0.0496472	1.96299	0.248213	-1.1547	0.00876389	0.678234	0.097071	0.582924
cg03342674	0.0153138	-2.42487	0.817361	-0.23094	0.0144693	0.533235	0.66256	0.245913
cg03345976	0.0433081	2.02073	0.165857	1.38564	0.0280176	0.724365	0.911281	0.305394
cg03353654	0.00558362	2.77128	0.908073	0.11547	0.00821037	0.713564	0.555365	0.722231
cg03355989	0.0496472	1.96299	0.326348	0.981495	0.0112727	0.864425	0.13828	0.189297
cg03363283	0.00791179	2.65581	0.326348	0.981495	0.0278942	0.94976	0.973097	0.435357
cg03364760	0.0153138	2.42487	0.86249	0.173205	0.0177072	0.515786	0.63475	0.518449
cg03366627	0.0376669	2.07846	0.488422	0.69282	0.0316795	0.970274	0.633762	0.26961
cg03371407	0.0496472	1.96299	0.248213	-1.1547	0.0311279	0.899726	0.235805	0.984704
cg03375371	0.00466913	-2.82902	0.525373	-0.635085	0.0337201	0.499389	0.845986	0.589802
cg03375993	0.00323491	2.94449	0.908073	0.11547	0.0124769	0.990795	0.944256	0.775034
cg03378725	0.0496472	-1.96299	0.488422	0.69282	0.0418564	0.349582	0.186431	0.601533
cg03380448	0.0110744	2.54034	0.386476	0.866025	0.0117739	0.946794	0.566096	0.337155
cg03381863	0.0110744	2.54034	0.488422	0.69282	0.0171379	0.925261	0.936787	0.454132
cg03383006	0.0433081	2.02073	0.418923	-0.80829	0.0158216	0.898926	0.393011	0.160769
cg03387507	0.0376669	-2.07846	0.525373	0.635085	0.00322221	0.0851292	0.0987356	0.222531
cg03390187	0.0179263	2.36714	0.272656	-1.09697	0.0137516	0.947257	0.492069	0.199047
cg03390363	0.00665673	2.71355	0.418923	0.80829	0.00788414	0.20219	0.648699	0.584199
cg03395247	0.0243434	2.25167	0.86249	-0.173205	0.00789564	0.116141	0.524999	0.252327
cg03402120	0.0209213	2.3094	0.644167	0.46188	0.0129222	0.716839	0.241081	0.508262
cg03402235	0.00149616	-3.17543	0.603332	0.519615	0.0021458	0.351865	0.961044	0.353181
cg03403093	0.00791179	-2.65581	0.272656	1.09697	0.0017073	0.131601	0.38905	0.395575
cg03403191	0.0433081	2.02073	0.77283	0.288675	0.0315709	0.502845	0.269961	0.905979
cg03406305	0.0376669	2.07846	0.603332	-0.519615	0.0241739	0.602353	0.564206	0.206806
cg03407701	0.0209213	-2.3094	0.525373	-0.635085	0.0322893	0.564204	0.497413	0.523928
cg03407782	0.0153138	2.42487	1	0	0.0162473	0.348689	0.36182	0.936838
cg03409108	0.00268017	3.00222	0.563703	-0.57735	0.00396007	0.902715	0.0929514	0.513932
cg03414474	0.0433081	-2.02073	0.0646717	-1.84752	0.0365966	0.728329	0.896869	0.185567
cg03414932	0.0496472	1.96299	0.184209	-1.32791	0.0207231	0.559643	0.361797	0.234941
cg03415149	0.0130425	2.48261	0.355611	-0.92376	0.0207571	0.889676	0.407327	0.349065
cg03424772	0.0153138	2.42487	0.525373	0.635085	0.0183519	0.904296	0.474289	0.625893
cg03425101	0.0209213	2.3094	0.908073	-0.11547	0.0448901	0.634351	0.654837	0.592176
cg03428109	0.0326634	2.1362	0.563703	-0.57735	0.0460469	0.990486	0.64765	0.402218
cg03429696	0.000428568	3.52184	0.45292	-0.750555	0.00348457	0.971488	0.717968	0.73983
cg03429873	0.0130425	2.48261	0.204024	-1.27017	0.0194546	0.814178	0.644454	0.624637
cg03431950	0.00558362	2.77128	0.488422	-0.69282	0.0159477	0.719195	0.602465	0.751151
cg03434950	0.0179263	2.36714	1	0	0.0167294	0.657657	0.44108	0.40452
cg03435248	0.0153138	2.42487	0.386476	-0.866025	0.0216909	0.548603	0.700095	0.750741
cg03435384	0.0179263	2.36714	0.817361	-0.23094	0.0395341	0.604651	0.517102	0.594614
cg03437770	0.0130425	-2.48261	0.386476	0.866025	0.0231149	0.516195	0.736775	0.28132
cg03441067	0.0209213	-2.3094	0.0832645	1.73205	0.0158785	0.289939	0.533534	0.465551
cg03442375	0.00323491	2.94449	0.908073	-0.11547	0.00353695	0.504061	0.437944	0.497291
cg03443549	0.00937477	2.59808	0.386476	-0.866025	0.0145774	0.934018	0.758648	0.562403
cg03444641	0.0179263	2.36714	0.86249	-0.173205	0.0294674	0.69003	0.603383	0.414735
cg03450486	0.0209213	2.3094	0.686106	0.404145	0.0349724	0.602925	0.938278	0.291339
cg03450719	0.00466913	2.82902	0.418923	0.80829	0.0147026	0.747415	0.549706	0.553449
cg03456393	0.0433081	-2.02073	0.45292	-0.750555	0.0283416	0.282635	0.638099	0.285321
cg03458099	0.00791179	2.65581	0.77283	-0.288675	0.0190259	0.857411	0.647351	0.709015
cg03458463	0.0243434	-2.25167	0.603332	-0.519615	0.00300951	0.754158	0.246979	0.09047
cg03460546	0.0243434	-2.25167	0.133327	-1.50111	0.0392928	0.345656	0.70919	0.623699
cg03460788	0.0326634	2.1362	0.272656	-1.09697	0.0332583	0.964525	0.289596	0.707466
cg03463462	0.00791179	-2.65581	0.248213	1.1547	0.0332718	0.49401	0.559871	0.906221
cg03465157	0.0496472	1.96299	0.729034	0.34641	0.0402984	0.54928	0.31213	0.770106
cg03465740	0.00937477	2.59808	0.0646717	-1.84752	0.0360218	0.936753	0.313706	0.809502
cg03465894	0.00323491	2.94449	0.355611	0.92376	0.00436198	0.696774	0.676023	0.758543
cg03468793	0.00937477	2.59808	0.45292	-0.750555	0.0333182	0.628916	0.878541	0.556213
cg03470597	0.0179263	2.36714	0.204024	-1.27017	0.02683	0.668378	0.387651	0.989717
cg03477771	0.00665673	2.71355	0.908073	-0.11547	0.00295853	0.880679	0.165174	0.427211
cg03479422	0.0130425	2.48261	0.86249	-0.173205	0.0107642	0.610302	0.917468	0.19082
cg03480935	0.0433081	2.02073	0.77283	-0.288675	0.0148206	0.354611	0.399277	0.545041
cg03485217	0.00389242	2.88675	0.603332	0.519615	0.00346206	0.654798	0.766712	0.337636
cg03486281	0.0243434	2.25167	0.184209	-1.32791	0.0357916	0.923739	0.30604	0.626193
cg03488588	0.0110744	2.54034	0.908073	0.11547	0.0108034	0.820655	0.747641	0.199261
cg03490228	0.0326634	-2.1362	0.225346	1.21244	0.0155049	0.682864	0.168359	0.207887
cg03490678	0.0243434	2.25167	0.165857	1.38564	0.0147496	0.326807	0.4538	0.760729
cg03492603	0.0179263	2.36714	0.817361	0.23094	0.0186819	0.629785	0.984593	0.250483
cg03492924	0.0282404	-2.19393	0.418923	-0.80829	0.0427577	0.861229	0.523916	0.921579
cg03494852	0.00466913	2.82902	0.326348	0.981495	0.0407552	0.864819	0.786486	0.988336
cg03497182	0.0433081	2.02073	0.729034	-0.34641	0.0482715	0.746271	0.409363	0.675182
cg03506316	0.0110744	2.54034	0.0734883	-1.78979	0.00778616	0.766141	0.776843	0.289649
cg03506942	0.0153138	2.42487	0.148915	1.44338	0.0291301	0.458326	0.743236	0.913773
cg03509253	0.0496472	-1.96299	0.248213	1.1547	0.0273588	0.387406	0.574756	0.245581
cg03510105	0.00791179	2.65581	0.525373	0.635085	0.0231561	0.703152	0.563187	0.7568
cg03510511	0.00182274	3.11769	0.355611	-0.92376	0.00595892	0.749204	0.620846	0.620379
cg03512881	0.00937477	2.59808	0.729034	-0.34641	0.0458334	0.39919	0.251298	0.858887
cg03513180	0.0209213	2.3094	0.225346	-1.21244	0.0208784	0.922196	0.179744	0.766099
cg03515735	0.0110744	-2.54034	0.0646717	1.84752	0.0214862	0.581366	0.995714	0.212426
cg03515845	0.0433081	-2.02073	0.525373	0.635085	0.0117827	0.9387	0.261364	0.171289
cg03518457	0.00665673	-2.71355	0.729034	0.34641	0.00559618	0.464427	0.265323	0.323314
cg03520021	0.0282404	-2.19393	0.133327	-1.50111	0.022162	0.462401	0.395289	0.749226
cg03525643	0.00323491	2.94449	0.563703	0.57735	0.0130663	0.604066	0.358445	0.956202
cg03527919	0.000658337	-3.40637	0.248213	-1.1547	0.000187829	0.114947	0.808759	0.0912972
cg03531100	0.0282404	2.19393	0.184209	-1.32791	0.0398047	0.849874	0.478559	0.930238
cg03534166	0.00221369	3.05996	0.386476	0.866025	0.00145667	0.277286	0.529692	0.13085
cg03535831	0.0433081	-2.02073	0.119033	1.55885	0.0246807	0.851874	0.571223	0.41176
cg03537711	0.0282404	2.19393	0.386476	0.866025	0.0398254	0.777975	0.913926	0.364046
cg03540339	0.00323491	2.94449	0.105969	-1.61658	0.0077254	0.750579	0.426334	0.579845
cg03541057	0.0179263	2.36714	0.225346	1.21244	0.0256797	0.531362	0.682823	0.459533
cg03545101	0.0110744	2.54034	0.386476	0.866025	0.0320029	0.5899	0.782927	0.907395
cg03545548	0.0376669	2.07846	0.119033	1.55885	0.0485822	0.950017	0.832709	0.26077
cg03554483	0.0376669	-2.07846	0.204024	1.27017	0.0378857	0.552566	0.513445	0.916577
cg03555299	0.0282404	2.19393	0.355611	0.92376	0.0430099	0.640834	0.306003	0.762527
cg03556404	0.00665673	-2.71355	0.204024	-1.27017	0.0421995	0.637709	0.736063	0.71203
cg03560743	0.0326634	-2.1362	0.77283	-0.288675	0.041127	0.940459	0.354341	0.663352
cg03560850	0.0496472	1.96299	0.0940686	-1.67432	0.0483332	0.676001	0.204362	0.569549
cg03561328	0.0130425	2.48261	0.817361	-0.23094	0.0401747	0.964174	0.458737	0.645093
cg03565241	0.0326634	2.1362	0.418923	-0.80829	0.0195806	0.385305	0.322264	0.730143
cg03565499	0.0433081	2.02073	0.908073	-0.11547	0.0336799	0.264713	0.815916	0.20706
cg03565584	0.0326634	2.1362	0.355611	-0.92376	0.0475621	0.749337	0.651686	0.453454
cg03570045	0.0153138	2.42487	0.86249	0.173205	0.0206861	0.80453	0.579842	0.52773
cg03575641	0.0130425	-2.48261	0.386476	-0.866025	0.00369363	0.3985	0.0755066	0.878428
cg03577128	0.00791179	2.65581	0.563703	-0.57735	0.0221646	0.665305	0.49359	0.443614
cg03577347	0.0433081	-2.02073	0.525373	0.635085	0.0256637	0.694188	0.203626	0.289631
cg03579492	0.00466913	2.82902	1	0	0.0172467	0.526401	0.345005	0.814708
cg03579987	0.0243434	2.25167	0.488422	-0.69282	0.0464633	0.713298	0.344575	0.927623
cg03584826	0.0243434	2.25167	0.729034	-0.34641	0.0236988	0.480074	0.744982	0.845765
cg03587907	0.0326634	-2.1362	0.729034	-0.34641	0.0089682	0.0603449	0.314263	0.558808
cg03591582	0.0110744	2.54034	0.0832645	-1.73205	0.0168595	0.526716	0.894298	0.927736
cg03591760	0.0243434	2.25167	0.77283	0.288675	0.0221936	0.781954	0.31087	0.886482
cg03593271	0.000275504	3.63731	0.248213	1.1547	0.000365891	0.532093	0.693694	0.552423
cg03595402	0.0209213	2.3094	0.488422	-0.69282	0.0128487	0.312748	0.763061	0.209543
cg03595784	0.0153138	2.42487	0.95396	0.057735	0.0291357	0.450301	0.939944	0.773658
cg03598159	0.0282404	-2.19393	0.0567468	1.90526	0.0223329	0.640987	0.559356	0.287705
cg03602233	0.0433081	-2.02073	0.184209	1.32791	0.0457398	0.70514	0.631582	0.559652
cg03602360	0.0496472	1.96299	0.225346	-1.21244	0.034024	0.39942	0.873628	0.165574
cg03606670	0.0110744	2.54034	0.488422	0.69282	0.0338307	0.942391	0.74534	0.887534
cg03610733	0.0282404	2.19393	0.525373	-0.635085	0.025046	0.40158	0.421511	0.50248
cg03614626	0.0496472	1.96299	0.95396	0.057735	0.00958524	0.474692	0.836508	0.0922605
cg03614796	0.0243434	2.25167	0.95396	-0.057735	0.0291487	0.610668	0.621068	0.283289
cg03615596	0.0433081	2.02073	0.418923	-0.80829	0.033524	0.717999	0.388642	0.534939
cg03615933	0.0243434	2.25167	0.248213	-1.1547	0.0176552	0.39892	0.528774	0.284441
cg03618811	0.0326634	2.1362	0.95396	-0.057735	0.0493429	0.734909	0.836948	0.839086
cg03621279	0.0209213	2.3094	0.355611	0.92376	0.0339224	0.607195	0.390752	0.511531
cg03622604	0.0433081	2.02073	0.729034	0.34641	0.033895	0.544127	0.131845	0.732542
cg03626364	0.0282404	2.19393	0.165857	-1.38564	0.0420079	0.823293	0.667161	0.272155
cg03626668	0.0282404	2.19393	0.272656	1.09697	0.0184475	0.798571	0.33409	0.432804
cg03627038	0.0282404	2.19393	0.729034	-0.34641	0.0113831	0.446503	0.761966	0.136365
cg03630088	0.0243434	-2.25167	0.644167	0.46188	0.0157929	0.836987	0.286624	0.494246
cg03630596	0.0496472	1.96299	0.95396	-0.057735	0.0276329	0.65926	0.406561	0.271439
cg03633861	0.0376669	2.07846	0.563703	0.57735	0.0415847	0.351793	0.487769	0.906616
cg03634928	0.0326634	2.1362	0.418923	-0.80829	0.0209682	0.536916	0.573202	0.172862
cg03635266	0.0282404	2.19393	0.248213	-1.1547	0.0266868	0.809335	0.2311	0.743141
cg03635863	0.00937477	2.59808	0.644167	-0.46188	0.0151228	0.878228	0.313504	0.999857
cg03636183	0.0433081	2.02073	0.355611	-0.92376	0.048964	0.91836	0.323871	0.609196
cg03638886	0.0130425	2.48261	0.298698	1.03923	0.0276245	0.867069	0.880705	0.580781
cg03639864	0.0130425	2.48261	0.817361	-0.23094	0.00815473	0.805065	0.99438	0.226297
cg03643032	0.0376669	2.07846	0.298698	-1.03923	0.0272383	0.375611	0.287207	0.670833
cg03644484	0.0282404	2.19393	0.488422	-0.69282	0.0265452	0.949197	0.729879	0.31634
cg03648063	0.000428568	-3.52184	1	0	0.000120298	0.359983	0.923475	0.146755
cg03649855	0.0282404	2.19393	0.77283	-0.288675	0.0220317	0.644929	0.785942	0.246105
cg03650233	0.0496472	1.96299	0.0940686	-1.67432	0.0122922	0.31677	0.178839	0.537402
cg03651581	0.00791179	2.65581	0.525373	0.635085	0.0254076	0.805305	0.656126	0.760752
cg03653317	0.0496472	1.96299	0.729034	0.34641	0.0251139	0.477848	0.967247	0.297835
cg03654169	0.0153138	-2.42487	0.45292	-0.750555	0.0458733	0.67102	0.385351	0.812908
cg03654560	0.00558362	2.77128	0.272656	-1.09697	0.0097397	0.390568	0.250635	0.603462
cg03656632	0.0209213	2.3094	0.355611	-0.92376	0.0335714	0.949052	0.576398	0.485891
cg03657038	0.0179263	2.36714	0.488422	0.69282	0.0317832	0.770016	0.790335	0.743025
cg03657837	0.0433081	2.02073	0.355611	-0.92376	0.025286	0.643316	0.337023	0.308933
cg03659961	0.0282404	2.19393	0.603332	-0.519615	0.0438499	0.684213	0.392995	0.85633
cg03661428	0.0130425	2.48261	0.525373	-0.635085	0.0220726	0.621377	0.390629	0.675731
cg03663161	0.0376669	2.07846	0.45292	0.750555	0.0182592	0.521252	0.124922	0.782021
cg03671265	0.0153138	-2.42487	0.525373	0.635085	0.0221369	0.822395	0.468112	0.534885
cg03674076	0.00466913	-2.82902	0.488422	0.69282	0.00451551	0.787258	0.71373	0.938426
cg03678722	0.0110744	2.54034	0.326348	-0.981495	0.0137197	0.864009	0.448585	0.363889
cg03685286	0.00558362	2.77128	0.908073	0.11547	0.00522389	0.471437	0.399073	0.693046
cg03688677	0.00937477	2.59808	0.644167	0.46188	0.0205914	0.723088	0.614759	0.946174
cg03689940	0.0433081	2.02073	0.525373	-0.635085	0.0218666	0.854458	0.402357	0.692601
cg03692305	0.0433081	-2.02073	0.563703	0.57735	0.0353695	0.778821	0.402417	0.607332
cg03692651	0.00937477	2.59808	0.686106	-0.404145	0.0211346	0.595047	0.192317	0.769386
cg03692937	0.0130425	-2.48261	0.729034	0.34641	0.00959719	0.4983	0.153725	0.594015
cg03695083	0.0179263	2.36714	0.86249	0.173205	0.0190141	0.748671	0.712193	0.811368
cg03696277	0.00389242	2.88675	0.77283	0.288675	0.0143099	0.925346	0.361803	0.576376
cg03703707	0.0209213	-2.3094	0.0734883	-1.78979	0.0421318	0.98595	0.30789	0.282572
cg03703916	0.0496472	1.96299	0.686106	-0.404145	0.0378046	0.86745	0.49235	0.34612
cg03704381	0.0376669	2.07846	0.184209	-1.32791	0.0227675	0.87233	0.296584	0.658115
cg03708499	0.0179263	2.36714	0.603332	-0.519615	0.0167518	0.57379	0.662036	0.141379
cg03708951	0.00937477	2.59808	0.165857	-1.38564	0.011159	0.358793	0.342221	0.804858
cg03711675	0.0282404	2.19393	0.326348	-0.981495	0.0234662	0.770522	0.465228	0.443281
cg03711717	0.0209213	2.3094	0.817361	-0.23094	0.0488667	0.732539	0.788194	0.925055
cg03713860	0.0130425	2.48261	0.148915	-1.44338	0.00288103	0.21604	0.865632	0.082213
cg03714619	0.0326634	-2.1362	0.603332	-0.519615	0.0358677	0.424184	0.98203	0.595662
cg03718353	0.0282404	2.19393	0.45292	-0.750555	0.0432358	0.513021	0.361238	0.854933
cg03721058	0.0153138	-2.42487	0.248213	1.1547	0.0226601	0.775941	0.546383	0.363428
cg03721816	0.0282404	2.19393	0.77283	-0.288675	0.0390651	0.862778	0.945968	0.425315
cg03722000	0.0326634	2.1362	0.298698	-1.03923	0.0327146	0.798869	0.355805	0.677073
cg03722513	0.0433081	-2.02073	0.686106	-0.404145	0.0309682	0.617387	0.295355	0.93572
cg03722670	0.00791179	2.65581	0.603332	0.519615	0.0277276	0.94873	0.826107	0.76345
cg03727481	0.0243434	2.25167	0.184209	-1.32791	0.0342274	0.522536	0.516584	0.665807
cg03729092	0.0433081	-2.02073	0.298698	1.03923	0.0165322	0.169403	0.328475	0.34644
cg03729857	0.0433081	2.02073	0.386476	0.866025	0.0417404	0.609873	0.657619	0.759793
cg03731908	0.0496472	1.96299	0.488422	-0.69282	0.0495084	0.945474	0.610667	0.548392
cg03732007	0.0179263	-2.36714	0.272656	-1.09697	0.0199023	0.842421	0.444778	0.429164
cg03738116	0.0433081	2.02073	0.248213	-1.1547	0.0226655	0.888513	0.192635	0.269952
cg03738707	0.0130425	-2.48261	0.644167	-0.46188	0.0266291	0.876327	0.361858	0.608221
cg03740752	0.0433081	2.02073	0.418923	-0.80829	0.0217972	0.414664	0.518055	0.739284
cg03741348	0.0282404	-2.19393	0.45292	0.750555	0.0415204	0.572277	0.297578	0.826261
cg03743605	0.0282404	-2.19393	0.563703	0.57735	0.0228807	0.977432	0.930804	0.338664
cg03744748	0.0282404	2.19393	0.0940686	1.67432	0.0363467	0.463276	0.773966	0.722584
cg03746345	0.0496472	-1.96299	0.45292	-0.750555	0.0446729	0.900837	0.440047	0.505735
cg03751944	0.0130425	2.48261	0.686106	0.404145	0.00882945	0.595439	0.873855	0.317314
cg03752203	0.00937477	2.59808	0.603332	-0.519615	0.0327217	0.811338	0.797392	0.517117
cg03752741	0.0179263	2.36714	0.908073	0.11547	0.00872696	0.731382	0.545509	0.218027
cg03752903	0.0209213	2.3094	0.686106	-0.404145	0.0259478	0.531583	0.538973	0.561627
cg03753470	0.0209213	2.3094	0.563703	0.57735	0.0372946	0.805708	0.66078	0.722433
cg03756888	0.0153138	2.42487	0.326348	-0.981495	0.0253804	0.99731	0.461238	0.948787
cg03757240	0.000998686	-3.2909	0.644167	-0.46188	0.00595044	0.52984	0.970911	0.662626
cg03757296	0.0209213	2.3094	0.105969	-1.61658	0.0288373	0.522476	0.357313	0.55223
cg03758316	4.14604e-05	-4.09919	0.355611	0.92376	5.69519e-05	0.388609	0.352993	0.898881
cg03758633	0.0433081	2.02073	0.165857	-1.38564	0.021707	0.733891	0.125703	0.61993
cg03760589	0.0209213	-2.3094	0.77283	-0.288675	0.0147786	0.943753	0.670823	0.0766641
cg03763874	0.0130425	2.48261	0.95396	-0.057735	0.0296706	0.754218	0.524426	0.900455
cg03764092	0.0326634	2.1362	0.563703	-0.57735	0.0496279	0.841774	0.519481	0.419059
cg03765873	0.0496472	1.96299	0.86249	0.173205	0.0463937	0.600882	0.241465	0.857947
cg03766586	0.0496472	1.96299	0.95396	-0.057735	0.03659	0.529023	0.308533	0.530798
cg03769205	0.00182274	3.11769	0.204024	1.27017	0.00188615	0.274078	0.301978	0.175139
cg03769206	0.0433081	2.02073	0.326348	-0.981495	0.0493501	0.330948	0.635847	0.321533
cg03769734	0.00791179	2.65581	0.86249	0.173205	0.0218197	0.917078	0.601402	0.7336
cg03770746	0.00665673	2.71355	0.563703	-0.57735	0.039405	0.868033	0.64939	0.80765
cg03771374	0.0153138	2.42487	0.86249	0.173205	0.0412962	0.900704	0.906759	0.90015
cg03776800	0.0243434	2.25167	0.729034	-0.34641	0.0497014	0.790641	0.973547	0.656854
cg03788057	0.0179263	-2.36714	0.0940686	-1.67432	0.021594	0.879417	0.486652	0.722597
cg03790967	0.0130425	2.48261	0.644167	-0.46188	0.0373434	0.844977	0.344859	0.691455
cg03792111	0.00937477	2.59808	0.603332	-0.519615	0.00692773	0.858775	0.169251	0.363351
cg03794445	0.0243434	2.25167	0.817361	0.23094	0.0443268	0.334487	0.31388	0.692004
cg03799378	0.0282404	2.19393	0.908073	-0.11547	0.0267753	0.865797	0.384939	0.45723
cg03800065	0.0496472	1.96299	1	0	0.0212239	0.728385	0.132405	0.628722
cg03800141	0.000998686	3.2909	0.603332	0.519615	0.000635358	0.216242	0.481927	0.640279
cg03801213	0.0179263	2.36714	0.525373	-0.635085	0.0254081	0.736801	0.557658	0.592389
cg03807330	0.0243434	-2.25167	0.386476	0.866025	0.0181618	0.458265	0.357992	0.309589
cg03808462	0.0282404	2.19393	0.386476	0.866025	0.0476018	0.530491	0.890967	0.526316
cg03810376	0.0326634	2.1362	0.355611	-0.92376	0.00945896	0.271609	0.239219	0.434992
cg03812136	0.0179263	2.36714	0.488422	-0.69282	0.0183026	0.94239	0.221018	0.994866
cg03814703	0.0153138	2.42487	0.644167	-0.46188	0.0277679	0.742707	0.647699	0.693577
cg03814786	0.00389242	2.88675	0.563703	0.57735	0.00280099	0.460639	0.282172	0.977693
cg03816707	0.0496472	-1.96299	0.603332	0.519615	0.0265873	0.522706	0.838246	0.123397
cg03817164	0.0209213	2.3094	0.644167	-0.46188	0.0205747	0.884549	0.399952	0.714679
cg03817303	0.0130425	2.48261	0.686106	-0.404145	0.00756936	0.654961	0.270276	0.312102
cg03817912	0.0282404	2.19393	0.77283	-0.288675	0.0468778	0.818144	0.192276	0.9668
cg03818103	0.00791179	2.65581	0.729034	-0.34641	0.0116044	0.46106	0.57398	0.799181
cg03818395	0.0153138	2.42487	0.326348	0.981495	0.0456435	0.4956	0.571264	0.967411
cg03819869	0.0282404	2.19393	0.488422	-0.69282	0.0154839	0.240931	0.399213	0.223597
cg03823150	0.0110744	-2.54034	0.326348	-0.981495	0.0189114	0.550677	0.228046	0.340524
cg03824768	0.0326634	2.1362	0.355611	-0.92376	0.019119	0.515894	0.512072	0.276466
cg03825810	0.0179263	2.36714	0.272656	-1.09697	0.0153068	0.994925	0.382159	0.538965
cg03826594	0.0130425	-2.48261	0.0646717	1.84752	0.00590593	0.118764	0.340149	0.662133
cg03826642	0.0209213	-2.3094	0.386476	-0.866025	0.041227	0.679062	0.547825	0.415346
cg03827297	0.0376669	2.07846	0.729034	0.34641	0.0415737	0.50739	0.207095	0.75783
cg03836455	0.00665673	2.71355	0.563703	-0.57735	0.00289284	0.152521	0.515276	0.702769
cg03838156	0.0179263	-2.36714	0.686106	0.404145	0.0462423	0.76809	0.487376	0.582082
cg03841553	0.0209213	2.3094	0.817361	-0.23094	0.0413011	0.809732	0.883389	0.890277
cg03842440	0.0433081	2.02073	0.488422	0.69282	0.0303833	0.676726	0.240478	0.808421
cg03847155	0.0179263	2.36714	0.0832645	-1.73205	0.0015017	0.11075	0.0713445	0.62502
cg03847893	0.0179263	2.36714	0.204024	1.27017	0.0200171	0.718066	0.714185	0.777601
cg03849286	0.0179263	2.36714	0.603332	0.519615	0.00511639	0.595871	0.344931	0.169288
cg03849780	0.0130425	2.48261	0.729034	-0.34641	0.0315043	0.887557	0.477992	0.555809
cg03854238	0.0282404	-2.19393	0.133327	1.50111	0.0327382	0.47774	0.293338	0.751048
cg03854913	0.0282404	2.19393	0.563703	-0.57735	0.0385891	0.553111	0.494206	0.507807
cg03855052	0.0376669	-2.07846	0.386476	-0.866025	0.0376019	0.99718	0.671943	0.662561
cg03858590	0.0376669	-2.07846	0.525373	0.635085	0.0331197	0.247312	0.524937	0.308643
cg03863606	0.0376669	2.07846	0.45292	-0.750555	0.0443957	0.355649	0.292662	0.448784
cg03864359	0.00791179	2.65581	0.326348	-0.981495	0.0442637	0.880488	0.665744	0.514703
cg03865596	0.0243434	2.25167	0.326348	-0.981495	0.0191029	0.662628	0.369942	0.594374
cg03865667	0.0209213	-2.3094	0.0567468	-1.90526	0.0139753	0.357807	0.558898	0.314086
cg03868139	0.0496472	1.96299	0.95396	-0.057735	0.0278192	0.780536	0.81839	0.284159
cg03871267	0.00558362	-2.77128	0.686106	0.404145	0.0251734	0.808521	0.490611	0.686106
cg03871460	0.0153138	2.42487	0.355611	-0.92376	0.00226723	0.319864	0.0504048	0.912608
cg03879061	0.0153138	2.42487	0.644167	-0.46188	0.0204797	0.588048	0.424133	0.620797
cg03880375	0.0376669	2.07846	0.418923	0.80829	0.0239659	0.343261	0.809183	0.43539
cg03882242	0.0243434	-2.25167	0.95396	0.057735	0.0251321	0.68195	0.250848	0.541685
cg03886752	0.0243434	-2.25167	0.77283	0.288675	0.0199698	0.645526	0.737729	0.306213
cg03888033	0.0243434	2.25167	0.225346	-1.21244	0.0397247	0.797794	0.552756	0.954245
cg03893832	0.0153138	-2.42487	0.77283	-0.288675	0.0146543	0.827693	0.810791	0.291113
cg03895284	0.0179263	2.36714	0.488422	-0.69282	0.022382	0.600729	0.238453	0.64703
cg03896585	0.00558362	2.77128	0.418923	0.80829	0.0371014	0.743363	0.715957	0.936996
cg03896589	0.0179263	-2.36714	0.225346	1.21244	0.0474159	0.493427	0.302344	0.912393
cg03901475	0.0282404	2.19393	0.77283	-0.288675	0.033224	0.401439	0.513919	0.700493
cg03903215	0.0209213	2.3094	0.686106	-0.404145	0.0385752	0.588324	0.871138	0.834932
cg03906031	0.0110744	2.54034	0.603332	-0.519615	0.00737441	0.252822	0.397468	0.329676
cg03907521	0.0496472	-1.96299	0.225346	1.21244	0.0448897	0.299168	0.408867	0.665187
cg03910065	0.0282404	-2.19393	1	0	0.0462741	0.687389	0.673729	0.338285
cg03912094	0.0153138	2.42487	0.77283	-0.288675	0.0293439	0.562903	0.764066	0.957342
cg03913806	0.00791179	-2.65581	0.165857	1.38564	0.00276467	0.387877	0.86492	0.11052
cg03915989	0.0433081	-2.02073	0.86249	0.173205	0.018544	0.660724	0.328848	0.395902
cg03917138	0.0130425	-2.48261	0.418923	-0.80829	0.0257534	0.821403	0.903016	0.233411
cg03917796	0.0376669	2.07846	0.525373	-0.635085	0.0259103	0.790781	0.258071	0.498981
cg03919649	0.0326634	2.1362	0.95396	-0.057735	0.0248428	0.274017	0.728044	0.90302
cg03919875	0.0326634	2.1362	0.386476	-0.866025	0.00480843	0.229735	0.0604396	0.524056
cg03920147	0.0326634	2.1362	0.95396	-0.057735	0.017565	0.263006	0.315363	0.279802
cg03920999	0.0496472	-1.96299	0.563703	-0.57735	0.033272	0.190211	0.80201	0.207891
cg03923382	0.0376669	2.07846	0.204024	1.27017	0.0441459	0.705182	0.965062	0.544975
cg03926598	0.00937477	2.59808	0.729034	0.34641	0.0125333	0.531119	0.453673	0.780434
cg03928431	0.0130425	2.48261	0.644167	0.46188	0.0376391	0.877842	0.342667	0.681701
cg03931342	0.00268017	3.00222	0.603332	0.519615	0.00371457	0.406647	0.640252	0.925026
cg03931999	0.00558362	2.77128	0.729034	-0.34641	0.0120727	0.835966	0.601427	0.727078
cg03936701	0.0326634	2.1362	0.644167	-0.46188	0.0353826	0.491556	0.684849	0.51514
cg03939486	0.0110744	2.54034	0.148915	-1.44338	0.0460998	0.872503	0.84923	0.502503
cg03941368	0.0130425	-2.48261	0.525373	0.635085	0.0181127	0.643735	0.234663	0.533331
cg03941451	0.0153138	2.42487	0.563703	0.57735	0.0448121	0.749418	0.645956	0.51537
cg03942932	0.00466913	-2.82902	0.644167	0.46188	0.0234765	0.715515	0.430447	0.603726
cg03945827	0.0110744	2.54034	0.45292	-0.750555	0.0218561	0.552436	0.576961	0.558474
cg03946667	0.0376669	2.07846	0.86249	-0.173205	0.0417194	0.659733	0.36439	0.571457
cg03951139	0.0282404	2.19393	0.386476	-0.866025	0.0383219	0.756111	0.553058	0.438319
cg03951465	0.0179263	2.36714	0.418923	-0.80829	0.0314559	0.852475	0.784276	0.941891
cg03952578	0.00122428	3.23316	0.817361	0.23094	0.00158256	0.655617	0.211201	0.507676
cg03959232	0.0496472	-1.96299	0.908073	-0.11547	0.046322	0.880565	0.441019	0.425917
cg03959369	0.0130425	-2.48261	0.184209	1.32791	0.0145694	0.753037	0.659275	0.816101
cg03960424	0.0282404	2.19393	0.908073	-0.11547	0.0157092	0.407025	0.394716	0.364806
cg03961551	0.0282404	2.19393	0.0734883	-1.78979	0.0199213	0.905257	0.36479	0.467326
cg03961824	0.0153138	2.42487	0.908073	0.11547	0.00469446	0.591735	0.228222	0.256939
cg03962773	0.0153138	2.42487	1	0	0.035219	0.864272	0.563845	0.388984
cg03962867	0.00791179	2.65581	0.418923	-0.80829	0.0149715	0.908744	0.560933	0.69546
cg03964261	0.0496472	1.96299	0.488422	-0.69282	0.0412391	0.628597	0.276149	0.898856
cg03964681	0.0433081	2.02073	0.686106	-0.404145	0.0444087	0.425256	0.336349	0.851859
cg03971661	0.0130425	2.48261	0.644167	0.46188	0.0254689	0.9504	0.626937	0.575819
cg03976244	0.0433081	2.02073	0.148915	-1.44338	0.0388841	0.541125	0.556365	0.446136
cg03977295	0.0179263	2.36714	0.77283	0.288675	0.0226562	0.911002	0.696183	0.635902
cg03983597	0.00937477	2.59808	0.133327	1.50111	0.034761	0.410013	0.640417	0.931185
cg03984604	0.0496472	-1.96299	0.298698	1.03923	0.028688	0.41908	0.32213	0.256079
cg03985285	0.0153138	2.42487	0.525373	-0.635085	0.0224609	0.725376	0.406328	0.637996
cg03985360	0.0179263	2.36714	0.908073	-0.11547	0.025432	0.995254	0.197997	0.370456
cg03988297	0.00558362	2.77128	0.355611	0.92376	0.0154694	0.988399	0.709477	0.855019
cg03993163	0.00558362	2.77128	0.603332	-0.519615	0.0301056	0.895895	0.86776	0.921938
cg03998104	0.0326634	-2.1362	0.133327	-1.50111	0.0336611	0.75426	0.7582	0.467042
cg03999208	0.0282404	-2.19393	0.817361	0.23094	0.0152441	0.564268	0.372749	0.555319
cg03999688	0.00466913	2.82902	0.105969	-1.61658	0.00387157	0.481788	0.609665	0.440812
cg04004638	0.00221369	3.05996	0.603332	-0.519615	0.00139852	0.218794	0.333785	0.544554
cg04004744	0.0179263	2.36714	0.488422	0.69282	0.0468814	0.833372	0.873234	0.970733
cg04006565	0.00221369	3.05996	0.45292	0.750555	0.0017589	0.982326	0.0787996	0.816483
cg04011414	0.0110744	-2.54034	0.525373	-0.635085	0.0134629	0.873814	0.547081	0.842827
cg04011758	0.00665673	2.71355	0.525373	0.635085	0.0274116	0.664629	0.780814	0.693
cg04012082	0.00389242	-2.88675	0.86249	0.173205	0.00101366	0.0662192	0.542468	0.481313
cg04013750	0.0376669	-2.07846	0.729034	0.34641	0.0176557	0.230943	0.901448	0.445413
cg04014686	0.000658337	3.40637	0.386476	-0.866025	0.000267597	0.574591	0.689931	0.187526
cg04019364	0.0433081	-2.02073	0.355611	0.92376	0.0200194	0.267273	0.360475	0.355433
cg04021549	0.00389242	2.88675	0.148915	-1.44338	0.00569287	0.555014	0.314248	0.642056
cg04025917	0.0153138	2.42487	0.165857	-1.38564	0.0150471	0.907878	0.358822	0.61889
cg04028167	0.0326634	2.1362	0.563703	0.57735	0.018858	0.916602	0.567596	0.273297
cg04029926	0.0153138	-2.42487	0.525373	0.635085	0.0321121	0.664095	0.970859	0.863752
cg04031279	0.0496472	-1.96299	0.729034	0.34641	0.0266714	0.385613	0.294471	0.389946
cg04037585	0.0209213	2.3094	0.0940686	1.67432	0.0197159	0.643654	0.713786	0.546599
cg04038163	0.0153138	2.42487	0.86249	0.173205	0.024137	0.74175	0.90075	0.35367
cg04041976	0.00937477	2.59808	0.298698	1.03923	0.00877755	0.664184	0.230876	0.747047
cg04043873	0.0282404	2.19393	0.525373	-0.635085	0.0396098	0.758804	0.660393	0.742207
cg04044598	0.00389242	2.88675	0.355611	0.92376	0.00993697	0.576999	0.992542	0.664898
cg04044720	0.0326634	-2.1362	0.908073	-0.11547	0.0451432	0.98091	0.834136	0.345151
cg04045639	0.00389242	2.88675	0.95396	0.057735	0.00958984	0.799961	0.927977	0.603225
cg04046119	0.00665673	2.71355	0.95396	-0.057735	0.0183403	0.435406	0.730789	0.61809
cg04049008	0.0153138	2.42487	0.603332	-0.519615	0.021167	0.684432	0.887799	0.760764
cg04052038	0.0326634	2.1362	0.77283	0.288675	0.0305389	0.85586	0.294883	0.817771
cg04053021	0.0179263	2.36714	0.644167	-0.46188	0.0258568	0.744809	0.399717	0.549243
cg04056281	0.00558362	2.77128	0.95396	0.057735	0.0116414	0.434835	0.73726	0.429768
cg04058516	0.0153138	-2.42487	0.729034	-0.34641	0.0183618	0.598131	0.79317	0.717099
cg04064987	0.00665673	2.71355	0.563703	0.57735	0.0184005	0.555438	0.748861	0.642588
cg04066177	0.0179263	2.36714	0.0940686	1.67432	0.0204996	0.711756	0.920756	0.24971
cg04075781	0.0282404	-2.19393	0.272656	1.09697	0.0128225	0.523587	0.252724	0.468174
cg04077047	0.0243434	-2.25167	0.133327	1.50111	0.0376402	0.192337	0.469608	0.328476
cg04077141	0.0282404	2.19393	0.95396	0.057735	0.0452727	0.771786	0.828711	0.179957
cg04079260	0.00937477	-2.59808	0.204024	-1.27017	0.0193471	0.967568	0.683434	0.604114
cg04079306	0.0433081	-2.02073	0.105969	1.61658	0.0143619	0.211424	0.446204	0.273271
cg04080041	0.0179263	-2.36714	0.86249	-0.173205	0.0312388	0.757663	0.351235	0.670977
cg04082935	0.0433081	-2.02073	0.355611	0.92376	0.0479224	0.465087	0.353012	0.970158
cg04084356	0.00665673	2.71355	0.119033	-1.55885	0.00290193	0.507199	0.0564838	0.376832
cg04084749	0.0243434	-2.25167	0.95396	-0.057735	0.040854	0.470346	0.296634	0.825003
cg04092447	0.0326634	2.1362	0.729034	-0.34641	0.0327776	0.762752	0.307071	0.524753
cg04096758	0.0243434	2.25167	0.644167	0.46188	0.0322994	0.478746	0.365303	0.576305
cg04103251	0.00791179	2.65581	0.563703	-0.57735	0.0133413	0.550806	0.47019	0.928295
cg04104068	0.0376669	2.07846	0.644167	-0.46188	0.0286412	0.547448	0.256146	0.540758
cg04107251	0.0326634	2.1362	0.225346	-1.21244	0.0238527	0.706634	0.149116	0.843333
cg04107847	0.0496472	-1.96299	0.225346	1.21244	0.0193658	0.119853	0.579304	0.911015
cg04108406	0.0376669	2.07846	0.77283	0.288675	0.0484575	0.708316	0.377496	0.933133
cg04112574	0.0153138	2.42487	0.418923	-0.80829	0.0111335	0.768522	0.493641	0.418585
cg04112866	0.0153138	-2.42487	0.0567468	1.90526	0.0171362	0.477808	0.439446	0.287955
cg04113478	0.0110744	-2.54034	0.563703	0.57735	0.028842	0.794116	0.334996	0.64496
cg04115147	0.0496472	-1.96299	0.644167	-0.46188	0.0462788	0.497501	0.297053	0.615259
cg04115893	0.0326634	-2.1362	0.686106	0.404145	0.046412	0.396431	0.585078	0.68162
cg04117693	0.000532006	3.4641	0.298698	1.03923	0.0117104	0.674218	0.954293	0.983929
cg04117869	0.0433081	-2.02073	0.272656	-1.09697	0.041122	0.984153	0.65802	0.340713
cg04118741	0.0179263	2.36714	0.272656	-1.09697	0.024766	0.869601	0.32629	0.505913
cg04120272	0.0153138	2.42487	0.0734883	-1.78979	0.0219351	0.819181	0.327067	0.687204
cg04120400	0.00937477	2.59808	0.908073	0.11547	0.0176863	0.952063	0.930396	0.887191
cg04121535	0.0130425	2.48261	0.0832645	-1.73205	0.00345862	0.136498	0.28793	0.272739
cg04123519	0.0179263	2.36714	0.603332	-0.519615	0.0359277	0.583733	0.341185	0.771264
cg04124998	0.0130425	2.48261	0.817361	0.23094	0.0428761	0.887245	0.799937	0.594353
cg04130427	0.0243434	-2.25167	0.418923	0.80829	0.0393214	0.903537	0.570389	0.788161
[truncated: 10,941 more rows]

## Sheet: DEG list
Supplementary Table 4. The list of differentially methylated CpG sites and differentially expressed genes in the placenta
	P values High PM AD vs High PM healthy	Statistic High PM AD vs High PM healthy	P values Low PM AD vs Low PM healthy	statistic Low PM AD vs Low PM healthy	P values with covariate analysis	P values c_sex	P values M_age	P values M_atopy
ABCA8	0.0153138	2.42487	0.525373	-0.635085	0.00990015	0.314058	0.908668	0.101665
ABCD1	0.00665673	-2.71355	0.908073	0.11547	0.00587381	0.927945	0.499526	0.222537
ABCF3	0.0243434	-2.25167	0.817361	-0.23094	0.0367107	0.776992	0.456794	0.746223
ABHD17C	0.0110744	2.54034	0.686106	-0.404145	0.00788373	0.709636	0.620322	0.740909
ACADS	0.00149616	3.17543	0.133327	1.50111	0.00216398	0.483178	0.825033	0.584275
ACMSD	0.0209213	2.3094	0.133327	-1.50111	0.0266365	0.651625	0.460198	0.902272
ACOX2	0.0193733	2.33827	0.248213	-1.1547	0.0106275	0.812763	0.166066	0.456963
ACP5	0.0376669	2.07846	0.45292	0.750555	0.0166992	0.463697	0.781017	0.229015
ACY1	0.0433081	2.02073	0.488422	-0.69282	0.0260246	0.991628	0.196746	0.883294
ADGRF4	0.0130425	2.48261	0.0940686	-1.67432	0.0186118	0.548303	0.556041	0.530798
ADIG	0.0179263	-2.36714	0.488422	0.69282	0.0320788	0.731514	0.489788	0.767213
AGMAT	0.0243434	2.25167	0.603332	0.519615	0.0135617	0.362324	0.411212	0.828755
AGTPBP1	0.0326634	2.1362	0.817361	-0.23094	0.0224374	0.866881	0.458243	0.80138
AIG1	0.0153138	2.42487	0.95396	0.057735	0.048474	0.568515	0.537045	0.626363
AIPL1	0.0153138	-2.42487	0.272656	-1.09697	0.00783013	0.462988	0.79249	0.115918
AK1	0.0496472	1.96299	0.817361	0.23094	0.029328	0.552375	0.369065	0.209629
ALDH3B1	0.00791179	-2.65581	0.95396	0.057735	0.0126349	0.986811	0.429312	0.832527
ALMS1P	0.0153138	-2.42487	0.817361	-0.23094	0.00826416	0.116453	0.462043	0.964413
ANK1	0.0243434	2.25167	0.95396	-0.057735	0.0312943	0.557726	0.423154	0.352844
ANKMY2	0.0376669	2.07846	0.603332	0.519615	0.0239925	0.854596	0.265014	0.202644
ANKRD30BL	0.0282404	-2.19393	0.95396	0.057735	0.0406806	0.409526	0.589598	0.934469
ANKRD34C-AS1	0.0433081	-2.02073	0.563703	0.57735	0.0407966	0.475107	0.86305	0.461679
ANXA10	0.0282404	-2.19393	0.77283	0.288675	0.0362185	0.894896	0.883464	0.331321
APH1B	0.0209213	2.3094	0.95396	0.057735	0.0296236	0.750738	0.614415	0.387391
APOBR	0.0433081	-2.02073	0.603332	-0.519615	0.0153407	0.588523	0.258792	0.394404
AQP7P3	0.0179263	2.36714	0.908073	0.11547	0.00700306	0.42112	0.682117	0.104827
ARFGAP1	0.0179263	-2.36714	0.95396	-0.057735	0.0448591	0.854239	0.717444	0.712603
ARHGAP40	0.0179263	2.36714	0.908073	-0.11547	0.0209736	0.954944	0.533888	0.518502
ARHGEF19	0.0496472	-1.96299	0.386476	0.866025	0.0396998	0.492728	0.729123	0.708302
ARL6IP6	0.0326634	-2.1362	1	0	0.0271084	0.793931	0.360355	0.272259
ARMC2-AS1	0.0376669	-2.07846	0.326348	0.981495	0.0451236	0.722827	0.4344	0.895975
ARRDC5	0.0130425	2.48261	0.86249	-0.173205	0.0202487	0.724267	0.26007	0.49862
ARSB	0.0433081	2.02073	0.644167	0.46188	0.0312817	0.915838	0.426419	0.773951
ARSJ	0.0496472	1.96299	0.686106	0.404145	0.00938588	0.347431	0.427612	0.118214
ARSK	0.0496472	1.96299	0.418923	0.80829	0.0229886	0.638146	0.427228	0.470271
ASTL	0.0496472	1.96299	0.248213	-1.1547	0.0464228	0.796051	0.355151	0.538279
ASZ1	0.0350891	-2.10733	0.272656	-1.09697	0.0395798	0.551751	0.406547	0.468624
ATAD3C	0.00466913	2.82902	0.95396	-0.057735	0.00419241	0.420873	0.18993	0.554117
ATF6B	0.00558362	-2.77128	0.908073	0.11547	0.00525444	0.991678	0.209744	0.836681
ATOX1	0.0404041	2.04959	0.729034	-0.34641	0.0192683	0.315542	0.383189	0.316224
ATP12A	0.0376669	-2.07846	0.0567468	1.90526	0.0336619	0.284851	0.199624	0.903353
ATP13A1	0.0110744	-2.54034	0.148915	-1.44338	0.00441685	0.594667	0.172778	0.611675
ATP1A1-AS1	0.0209213	-2.3094	0.0832645	1.73205	0.0149096	0.771785	0.428233	0.434073
ATP2B2	0.0110744	-2.54034	0.729034	-0.34641	0.0321559	0.73971	0.989188	0.569909
ATXN1L	0.0110744	-2.54034	0.817361	-0.23094	0.00818005	0.575756	0.393165	0.638387
AZFP	0.0282404	2.19393	0.817361	-0.23094	0.0348019	0.306065	0.221014	0.507164
B9D1	0.0282404	-2.19393	0.119033	-1.55885	0.0229952	0.51583	0.219233	0.711995
BACE1	0.0110744	-2.54034	0.148915	-1.44338	0.0467223	0.584784	0.625332	0.925368
BAG3	0.000219851	-3.69504	0.77283	0.288675	0.000159012	0.509712	0.840228	0.584247
BAHD1	0.0209213	-2.3094	0.418923	0.80829	0.00577437	0.468772	0.0725863	0.572995
BBS4	0.0243434	2.25167	0.603332	-0.519615	0.005715	0.412068	0.0925192	0.190001
BCAR3	0.0376669	-2.07846	0.817361	-0.23094	0.0150559	0.769618	0.167103	0.387143
BCL11A	0.00665673	-2.71355	0.525373	-0.635085	0.012544	0.872967	0.806986	0.777235
BCL2A1	0.00791179	2.65581	0.77283	0.288675	0.0181115	0.835126	0.698331	0.427301
BEND3	0.0209213	-2.3094	0.386476	0.866025	0.0157375	0.504253	0.801688	0.385576
BHMT	0.0209213	-2.3094	0.817361	-0.23094	0.0323118	0.730083	0.650835	0.860488
BMP15	0.0209213	-2.3094	0.272656	1.09697	0.0215836	0.83479	0.853771	0.207311
BRDT	0.0243434	-2.25167	0.418923	-0.80829	0.0185502	0.901532	0.111842	0.734603
BTBD17	0.0130425	-2.48261	0.326348	-0.981495	0.0257612	0.470382	0.587984	0.97789
BTNL9	0.0496472	-1.96299	0.603332	0.519615	0.0303023	0.340418	0.277788	0.647678
C11orf21	0.0179263	2.36714	0.326348	-0.981495	0.0246164	0.605557	0.46617	0.701698
C14orf169	0.0433081	2.02073	0.908073	-0.11547	0.0429933	0.980393	0.627964	0.366265
C14orf37	0.00221369	-3.05996	0.817361	0.23094	0.00426099	0.633412	0.695254	0.586494
C15orf48	0.0496472	1.96299	0.77283	0.288675	0.0469008	0.731585	0.630121	0.357144
C16orf46	0.0282404	-2.19393	0.77283	0.288675	0.0180786	0.793936	0.481379	0.319868
C16orf58	0.00389242	-2.88675	0.603332	0.519615	0.00561121	0.459141	0.358308	0.790829
C16orf74	0.0130425	-2.48261	0.644167	0.46188	0.0119274	0.816642	0.357896	0.2539
C1QTNF5	0.0376669	2.07846	0.686106	0.404145	0.0055636	0.916513	0.112914	0.119927
C1orf174	0.0496472	-1.96299	0.0734883	-1.78979	0.0390141	0.696615	0.356938	0.490241
C1orf53	0.0209213	-2.3094	0.225346	-1.21244	0.0468521	0.702546	0.60844	0.813452
C20orf197	0.00323491	2.94449	0.0567468	-1.90526	0.0203548	0.882881	0.95115	0.881765
C20orf96	0.0179263	-2.36714	0.525373	-0.635085	0.0130997	0.779916	0.785277	0.321251
C21orf58	0.0179263	2.36714	0.908073	-0.11547	0.04534	0.588189	0.233347	0.92321
C2CD4C	0.0179263	2.36714	0.644167	0.46188	0.00974382	0.407691	0.261185	0.949171
C2orf83	0.00558362	2.77128	0.95396	-0.057735	0.00814228	0.638074	0.25523	0.763367
C4orf36	0.0110744	-2.54034	0.272656	1.09697	0.0429891	0.875313	0.717969	0.628115
C7orf43	0.0153138	-2.42487	0.86249	0.173205	0.0180706	0.59086	0.479804	0.869565
C7orf60	0.00466913	-2.82902	0.729034	-0.34641	0.0042145	0.610584	0.221572	0.509959
CA1	0.00558362	2.77128	0.386476	-0.866025	0.00094679	0.888698	0.512332	0.0955786
CABS1	0.0326634	2.1362	0.272656	-1.09697	0.0113022	0.686271	0.356642	0.333627
CAHM	0.00937477	-2.59808	0.148915	1.44338	0.0211124	0.496441	0.452257	0.930854
CALML3-AS1	0.0179263	2.36714	0.370844	-0.894893	0.0134631	0.457913	0.554133	0.274669
CALN1	0.00268017	-3.00222	0.603332	-0.519615	0.0100931	0.338227	0.985191	0.417064
CAMKMT	0.0326634	2.1362	0.644167	0.46188	0.0163518	0.84406	0.107616	0.935343
CAPN1	0.00937477	-2.59808	0.386476	-0.866025	0.0116164	0.75582	0.53488	0.668968
CAPN12	0.00558362	-2.77128	0.355611	0.92376	0.00900843	0.864096	0.240101	0.417717
CAPN5	0.0282404	2.19393	0.165857	1.38564	0.0355554	0.550712	0.271302	0.560517
CARKD	0.00665673	2.71355	0.355611	0.92376	0.0216415	0.589359	0.890081	0.399243
CASQ2	0.0376669	-2.07846	0.105969	-1.61658	0.0177265	0.851451	0.271397	0.26918
CASR	0.0496472	-1.96299	0.272656	-1.09697	0.041366	0.661081	0.263865	0.411296
CBX3	0.0243434	-2.25167	0.488422	0.69282	0.0313619	0.937726	0.517421	0.522605
CCDC122	0.00937477	-2.59808	0.386476	0.866025	0.0250802	0.59244	0.424702	0.555617
CCL4L2	0.0433081	2.02073	0.272656	-1.09697	0.0111897	0.698094	0.214535	0.268693
CCL7	0.0433081	2.02073	0.729034	0.34641	0.0314961	0.907843	0.431545	0.544883
CD1E	0.0179263	2.36714	0.45292	-0.750555	0.0394713	0.356386	0.809898	0.89748
CDC26	0.0496472	1.96299	1	0	0.0240205	0.658728	0.742738	0.193482
CDC37	0.0326634	-2.1362	0.488422	-0.69282	0.0487066	0.574081	0.199583	0.802374
CDC42SE1	0.0179263	-2.36714	0.86249	-0.173205	0.0189677	0.912007	0.205886	0.744854
CDK10	0.0153138	-2.42487	0.644167	-0.46188	0.0223548	0.58866	0.290961	0.676284
CDR1	0.0179263	-2.36714	0.386476	0.866025	0.0444706	0.749437	0.996673	0.600835
CDYL	0.0376669	-2.07846	0.45292	-0.750555	0.0310432	0.777108	0.474897	0.504399
CEACAM6	0.0110744	-2.54034	0.525373	0.635085	0.0186528	0.903144	0.659331	0.55461
CELSR2	0.0153138	2.42487	1	0	0.0209088	0.543253	0.624977	0.539795
CENPB	0.0209213	2.3094	0.908073	-0.11547	0.00568965	0.339964	0.141101	0.574929
CENPH	0.0179263	-2.36714	0.603332	0.519615	0.0170451	0.648708	0.939117	0.911236
CEP128	0.0179263	2.36714	0.86249	0.173205	0.0201921	0.513276	0.945524	0.521345
CEP85L	0.0130425	2.48261	1	0	0.0229314	0.824948	0.661727	0.546955
CHCHD4	0.0209213	2.3094	0.148915	-1.44338	0.0381056	0.867846	0.332616	0.55508
CHEK2	0.0326634	2.1362	0.165857	-1.38564	0.00562895	0.614129	0.280158	0.053918
CHL1	0.0110744	-2.54034	0.644167	-0.46188	0.021416	0.604948	0.700534	0.482166
CHRM3-AS2	0.00937477	2.59808	1	0	0.0146112	0.711002	0.293576	0.586309
CHRNA6	0.0282404	-2.19393	0.603332	0.519615	0.0243355	0.848212	0.816085	0.77792
CHRNE	0.0433081	-2.02073	0.126022	1.52998	0.0197835	0.639852	0.600599	0.249402
CHST9	0.00937477	2.59808	0.386476	-0.866025	0.0138564	0.722791	0.401978	0.744199
CHTOP	0.0130425	-2.48261	0.86249	0.173205	0.00447425	0.61824	0.143436	0.370636
CIRBP-AS1	0.000998686	-3.2909	0.563703	-0.57735	0.000598569	0.64688	0.959813	0.225667
CLDN7	0.0282404	-2.19393	0.525373	-0.635085	0.0371109	0.757902	0.894962	0.618151
CLEC18A	0.0179263	-2.36714	0.119033	1.55885	0.0453742	0.840122	0.663049	0.802863
CLEC3A	0.0433081	-2.02073	0.729034	-0.34641	0.0265854	0.360314	0.217209	0.936573
CLEC5A	0.00389242	-2.88675	0.165857	-1.38564	0.00537104	0.713332	0.523579	0.176601
CLN3	0.0153138	-2.42487	0.272656	-1.09697	0.0273064	0.9941	0.446197	0.340877
CNNM1	0.0326634	-2.1362	0.148915	-1.44338	0.0320897	0.738467	0.732134	0.369634
CNPY4	0.0496472	1.96299	0.686106	0.404145	0.0470408	0.754771	0.558299	0.303617
COL16A1	0.0179263	-2.36714	0.326348	-0.981495	0.0292573	0.686589	0.411309	0.588756
COL27A1	0.0496472	-1.96299	0.326348	0.981495	0.0244151	0.36723	0.111619	0.62073
COL5A1	0.0130425	-2.48261	0.525373	0.635085	0.00607456	0.385469	0.140017	0.457164
COLCA2	0.00268017	3.00222	0.563703	0.57735	0.00391462	0.451228	0.884695	0.760864
COLGALT1	0.0376669	2.07846	0.272656	1.09697	0.0441109	0.9813	0.806266	0.274769
COMMD1	0.0209213	2.3094	0.525373	0.635085	0.041751	0.638527	0.793335	0.439268
COMP	0.00791179	-2.65581	0.488422	-0.69282	0.00417256	0.864272	0.221155	0.12841
COTL1	0.00791179	-2.65581	0.355611	-0.92376	0.00123319	0.254703	0.0558071	0.924234
COX7B	0.0376669	2.07846	0.563703	0.57735	0.0185034	0.742972	0.654653	0.310982
CPT1C	0.0243434	-2.25167	0.77283	0.288675	0.0148764	0.664533	0.417584	0.22753
CRYAB	0.0110744	2.54034	0.525373	-0.635085	0.0112134	0.424733	0.679899	0.526735
CSHL1	0.00466913	-2.82902	0.525373	-0.635085	0.00975355	0.747497	0.481573	0.797181
CSPG5	0.00791179	-2.65581	0.148915	-1.44338	0.00798758	0.925583	0.637668	0.637657
CSRNP3	0.00937477	2.59808	0.298698	-1.03923	0.0236117	0.616964	0.296703	0.43424
CSRP1	0.0179263	-2.36714	0.119033	1.55885	0.0356555	0.951474	0.24467	0.915373
CTB-12O2.1	0.0282404	-2.19393	1	0	0.0229378	0.553063	0.963407	0.26935
CTSF	0.0496472	-1.96299	0.603332	-0.519615	0.0482146	0.405781	0.974317	0.613117
CUBN	0.0376669	2.07846	0.386476	0.866025	0.0139467	0.503888	0.20464	0.230376
CXXC1P1	0.00389242	2.88675	0.248213	-1.1547	0.00091847	0.192119	0.174034	0.490946
CYB5R2	0.0326634	-2.1362	0.272656	-1.09697	0.0170763	0.691257	0.235277	0.293294
CYBB	0.0326634	2.1362	0.95396	-0.057735	0.0116415	0.351467	0.410505	0.201471
CYP26A1	0.0433081	-2.02073	0.750832	0.317543	0.0182393	0.211702	0.47728	0.463029
CYP2C19	0.00665673	2.71355	0.908073	0.11547	0.0108214	0.402685	0.236524	0.530944
CYTIP	0.0326634	2.1362	0.95396	-0.057735	0.0166555	0.31818	0.1804	0.475035
DARS-AS1	0.00466913	-2.82902	0.729034	-0.34641	0.00475406	0.867329	0.337652	0.52386
DBX2	0.0433081	-2.02073	0.326348	0.981495	0.0134181	0.712519	0.568263	0.0835446
DCAF17	0.0376669	2.07846	0.77283	-0.288675	0.00750924	0.554564	0.140262	0.95043
DCAF4L2	0.00937477	2.59808	0.355611	0.92376	0.0146956	0.595288	0.837999	0.949253
DCAF8	0.0209213	-2.3094	0.355611	-0.92376	0.0441888	0.953113	0.54336	0.705137
DDHD2	0.0376669	-2.07846	0.119033	-1.55885	0.0168197	0.797083	0.225132	0.263756
DDIT3	0.0326634	2.1362	0.418923	-0.80829	0.0346735	0.330086	0.224957	0.61049
DDTL	0.0130425	-2.48261	0.298698	1.03923	0.0207917	0.366271	0.975098	0.725252
DDX11L10	0.0179263	-2.36714	0.95396	-0.057735	0.0271614	0.974694	0.538854	0.935566
DEDD	0.00466913	-2.82902	0.86249	0.173205	0.00646785	0.917823	0.436906	0.786996
DEDD2	0.0433081	2.02073	0.563703	-0.57735	0.0469634	0.521927	0.937627	0.590711
DEFA3	0.0282404	2.19393	1	0	0.0233195	0.613609	0.885546	0.831332
DGUOK	0.0209213	-2.3094	0.908073	-0.11547	0.0218738	0.577629	0.356814	0.777287
DHRS4	0.0020095	-3.08882	0.603332	0.519615	0.00598887	0.722587	0.80106	0.941754
DHRSX	0.0376669	-2.07846	0.644167	-0.46188	0.0247285	0.84126	0.530649	0.235222
DHX35	0.0282404	-2.19393	0.386476	-0.866025	0.0289751	0.840836	0.28077	0.928753
DKK4	0.0243434	-2.25167	0.644167	0.46188	0.0118045	0.412097	0.655793	0.316677
DNAH17	0.0326634	2.1362	0.355611	0.92376	0.0493156	0.738248	0.952628	0.429233
DOK3	0.0209213	2.3094	0.0832645	1.73205	0.0232606	0.706977	0.685677	0.301366
DPAGT1	0.0433081	-2.02073	0.204024	1.27017	0.0210329	0.458973	0.415322	0.437426
DPP9-AS1	0.0179263	-2.36714	0.86249	0.173205	0.0321243	0.691247	0.630875	0.583959
DSC3	0.0282404	-2.19393	0.45292	-0.750555	0.0429313	0.500761	0.403022	0.92605
DSG4	0.0110744	-2.54034	0.386476	0.866025	0.0243499	0.55709	0.596464	0.300407
DVL3	0.0209213	-2.3094	0.248213	-1.1547	0.0320565	0.721693	0.553198	0.891301
E2F4	0.0326634	-2.1362	0.603332	-0.519615	0.0194376	0.494397	0.100356	0.96701
E2F5	0.00221369	3.05996	0.686106	-0.404145	0.00277336	0.760162	0.264043	0.330777
EDNRB-AS1	0.0209213	2.3094	0.86249	0.173205	0.0427484	0.715941	0.193288	0.858537
EFCAB1	0.0326634	2.1362	0.686106	-0.404145	0.028789	0.908611	0.285565	0.544733
EFCAB12	0.0179263	2.36714	0.95396	0.057735	0.0325641	0.847558	0.63561	0.576214
EFNA4	0.0243434	2.25167	0.133327	-1.50111	0.0282036	0.652739	0.381802	0.239884
EIF3K	0.0282404	2.19393	0.386476	0.866025	0.0282663	0.744155	0.46507	0.31053
ELOVL2-AS1	0.00466913	-2.82902	0.386476	0.866025	0.0321537	0.738	0.74748	0.607108
ENAM	0.0110744	2.54034	0.525373	0.635085	0.00402653	0.745479	0.137645	0.963018
ENPP4	0.0433081	2.02073	0.45292	0.750555	0.0447099	0.574864	0.347551	0.476062
EPAS1	0.0153138	-2.42487	0.86249	-0.173205	0.026439	0.855112	0.173678	0.655077
EPM2A	0.0282404	2.19393	0.525373	0.635085	0.0391623	0.313587	0.404566	0.414603
ERBB2	0.0130425	-2.48261	0.86249	0.173205	0.0167923	0.713698	0.265858	0.522514
ERICH6	0.0110744	-2.54034	0.418923	-0.80829	0.0139888	0.900587	0.311226	0.847245
EVA1C	0.0153138	2.42487	0.204024	-1.27017	0.0283404	0.645059	0.917395	0.282785
EVI2B	0.0496472	1.96299	0.563703	-0.57735	0.025245	0.575608	0.282603	0.166402
EVPLL	0.00791179	-2.65581	0.418923	0.80829	0.00307341	0.416096	0.423583	0.284715
EVX1	0.0282404	-2.19393	0.686106	0.404145	0.0379633	0.836758	0.520557	0.443571
F10-AS1	0.0179263	-2.36714	0.148915	1.44338	0.0302561	0.742383	0.593606	0.636813
FABP9	0.0326634	2.1362	0.644167	-0.46188	0.0485176	0.654849	0.2552	0.674714
FAHD2A	0.00221369	-3.05996	0.105969	1.61658	0.00120082	0.244023	0.7121	0.29764
FAM120C	0.0433081	2.02073	0.225346	1.21244	0.0420663	0.934132	0.728052	0.400038
FAM132A	0.0376669	2.07846	0.0646717	1.84752	0.0150852	0.984457	0.554538	0.234242
FAM135B	0.00558362	2.77128	0.165857	-1.38564	0.0060152	0.516274	0.62443	0.260107
FAM162A	0.0209213	2.3094	0.148915	1.44338	0.0204868	0.83682	0.873643	0.627713
FAM166B	0.0179263	2.36714	0.729034	0.34641	0.0427525	0.3942	0.536877	0.468865
FAM20B	0.0433081	2.02073	0.95396	-0.057735	0.0245566	0.30547	0.202151	0.537445
FAM210B	0.0463866	1.99186	0.644167	0.46188	0.0403293	0.438976	0.74369	0.787775
FAM3A	0.0153138	-2.42487	0.0832645	-1.73205	0.0251097	0.929422	0.309735	0.630661
FAM3D	0.0326634	-2.1362	0.272656	-1.09697	0.0276666	0.500616	0.703479	0.772701
FAM69A	0.0282404	2.19393	0.525373	-0.635085	0.0337755	0.786634	0.670065	0.669578
FAM83F	0.0243434	2.25167	0.729034	0.34641	0.0108223	0.507168	0.236595	0.496401
FAM86EP	0.0243434	2.25167	0.355611	0.92376	0.0393449	0.981287	0.468572	0.311857
FAR2	0.00466913	-2.82902	0.248213	-1.1547	0.0158021	0.720303	0.80848	0.587849
FBXL14	0.0282404	-2.19393	0.686106	-0.404145	0.040566	0.837734	0.600227	0.39653
FBXO10	0.0153138	2.42487	0.603332	-0.519615	0.024663	0.88992	0.744158	0.536279
FBXO31	0.0326634	-2.1362	0.86249	-0.173205	0.0106498	0.459411	0.142454	0.891771
FCER1G	0.0243434	2.25167	0.603332	0.519615	0.0234498	0.967138	0.967537	0.228034
FER1L6-AS2	0.0243434	2.25167	0.563703	0.57735	0.0111943	0.819873	0.105756	0.667917
FEZ1	0.0179263	2.36714	0.908073	0.11547	0.0284331	0.373143	0.812119	0.980218
FGF8	0.0179263	2.36714	0.644167	-0.46188	0.0421443	0.905763	0.889495	0.437762
FGFR1OP2	0.0496472	1.96299	0.45292	-0.750555	0.0285569	0.293692	0.394977	0.242116
FIG4	0.0326634	2.1362	0.0567468	-1.90526	0.0414148	0.404251	0.492861	0.374293
FLJ31104	0.0179263	-2.36714	0.77283	-0.288675	0.0469139	0.530046	0.865987	0.507093
FOXD2	0.0179263	-2.36714	0.95396	-0.057735	0.0241166	0.778922	0.296148	0.981087
FOXG1	0.0433081	-2.02073	0.105969	1.61658	0.0296124	0.804227	0.431521	0.243064
FOXO3	0.00558362	2.77128	0.908073	0.11547	0.00361013	0.63293	0.930379	0.50343
FUBP3	0.00937477	-2.59808	0.386476	0.866025	0.0112154	0.951407	0.725574	0.683312
GAA	0.0496472	-1.96299	0.105969	-1.61658	0.0189443	0.771558	0.127723	0.453772
GABRA3	0.0282404	-2.19393	1	0	0.0430861	0.476745	0.608541	0.667918
GALNT7	0.0243434	-2.25167	0.729034	0.34641	0.0326662	0.703405	0.531301	0.398125
GAP43	0.000812117	-3.34863	0.272656	1.09697	0.00157377	0.265574	0.705089	0.689436
GAS2	0.0282404	-2.19393	0.95396	-0.057735	0.0185838	0.94702	0.323938	0.313934
GAS5	0.000428568	3.52184	0.603332	0.519615	0.000682154	0.539479	0.500152	0.508989
GATA3	0.0110744	-2.54034	0.248213	-1.1547	0.0107992	0.772953	0.230916	0.624636
GATA3-AS1	0.0153138	-2.42487	0.686106	0.404145	0.00730937	0.395463	0.144495	0.354243
GBP4	0.0209213	2.3094	0.326348	0.981495	0.0352325	0.997007	0.35129	0.287713
GBX2	0.0243434	-2.25167	0.355611	-0.92376	0.023806	0.741085	0.675445	0.532145
GCDH	0.00937477	2.59808	0.908073	0.11547	0.00601358	0.736621	0.447581	0.19805
GCFC2	0.0326634	2.1362	0.729034	-0.34641	0.0386029	0.478015	0.969405	0.448743
GDF5	0.0496472	1.96299	0.418923	0.80829	0.0288097	0.932798	0.447282	0.315795
GFRA1	0.00665673	-2.71355	0.603332	0.519615	0.00346532	0.699887	0.794922	0.135571
GLIS2	0.00937477	-2.59808	0.148915	1.44338	0.0067465	0.512805	0.525679	0.397742
GLRA2	0.0376669	2.07846	0.729034	-0.34641	0.0435229	0.92291	0.258106	0.901525
GMIP	0.0433081	-2.02073	0.86249	0.173205	0.0336486	0.885369	0.229041	0.579835
GNB5	0.0153138	2.42487	0.95396	-0.057735	0.0143773	0.702829	0.466733	0.450463
GNL1	0.00791179	-2.65581	0.563703	0.57735	0.0108949	0.761166	0.818642	0.48343
GORASP2	0.00791179	-2.65581	0.603332	0.519615	0.00157829	0.61173	0.302197	0.651298
GPLD1	0.00182274	3.11769	0.86249	0.173205	0.0125702	0.762508	0.316931	0.908539
GPR107	0.0282404	-2.19393	0.603332	-0.519615	0.0208261	0.889941	0.327246	0.669668
GPR137	0.00937477	-2.59808	0.326348	-0.981495	0.00369555	0.950614	0.582712	0.109641
GPR78	0.00937477	-2.59808	0.204024	-1.27017	0.00283205	0.461132	0.278446	0.281661
GPRIN2	0.0243434	2.25167	0.488422	-0.69282	0.0110307	0.415717	0.673038	0.148757
GPS2	0.0282404	-2.19393	0.298698	1.03923	0.0372305	0.87175	0.740789	0.939345
GPX3	0.00323491	2.94449	0.326348	-0.981495	0.0108156	0.218764	0.40779	0.437461
GRHL2	0.00791179	-2.65581	0.603332	-0.519615	0.0196802	0.719047	0.227105	0.721783
GRIA3	0.0404041	2.04959	0.0734883	-1.78979	0.049518	0.496885	0.429949	0.846674
GRIK2	0.00268017	3.00222	0.326348	0.981495	0.00598	0.589171	0.888141	0.795541
GRM6	0.00268017	3.00222	0.603332	-0.519615	0.00977368	0.965711	0.621624	0.76629
GRPR	0.00323491	2.94449	0.488422	-0.69282	0.00756099	0.817166	0.483862	0.683505
GS1-24F4.2	0.00937477	-2.59808	0.418923	0.80829	0.023148	0.775889	0.885535	0.827245
GSR	0.0110744	2.54034	0.729034	-0.34641	0.00510242	0.262962	0.821341	0.198487
GSTT2B	0.00268017	3.00222	0.563703	-0.57735	0.00347068	0.8136	0.522483	0.798543
GTF2H4	0.0179263	-2.36714	0.525373	0.635085	0.00770331	0.308424	0.230212	0.33112
GTF3C6	0.00466913	2.82902	0.488422	0.69282	0.00331019	0.246051	0.421012	0.517913
GTPBP2	0.0179263	-2.36714	0.729034	-0.34641	0.0257748	0.664295	0.464966	0.597513
GTPBP3	0.0179263	-2.36714	0.729034	-0.34641	0.0292218	0.834806	0.579514	0.396621
GXYLT2	0.0209213	2.3094	0.908073	-0.11547	0.0372624	0.952052	0.460061	0.563013
H1FNT	0.0179263	-2.36714	0.204024	1.27017	0.0378161	0.575444	0.376394	0.677711
H2BFM	0.0179263	2.36714	0.525373	-0.635085	0.00348588	0.535548	0.449224	0.165211
H3F3A	0.0326634	-2.1362	0.729034	0.34641	0.0419674	0.997869	0.252824	0.512888
HAND2-AS1	0.0282404	2.19393	0.686106	-0.404145	0.0288969	0.37255	0.495957	0.475468
HDGFRP2	0.0326634	-2.1362	0.204024	1.27017	0.0238305	0.333334	0.467615	0.524859
HECTD2	0.00122428	3.23316	0.272656	1.09697	0.000646456	0.758519	0.910952	0.0957028
HERC2P10	0.0496472	-1.96299	0.525373	-0.635085	0.0280988	0.531726	0.216682	0.597416
HGH1	0.00937477	-2.59808	0.0646717	1.84752	0.00551166	0.203409	0.219149	0.683179
HHIP	0.0433081	2.02073	0.686106	-0.404145	0.0183113	0.977928	0.0568458	0.263214
HHIP-AS1	0.00665673	-2.71355	0.272656	-1.09697	0.0252215	0.656696	0.954997	0.574004
HHIPL2	0.0282404	2.19393	0.77283	0.288675	0.0207967	0.984756	0.62934	0.513591
HINFP	0.00937477	2.59808	0.418923	-0.80829	0.00257244	0.749757	0.2097	0.222257
HIST1H1D	0.0496472	-1.96299	0.272656	-1.09697	0.0460678	0.488566	0.780576	0.535501
HIST1H2AJ	0.0376669	2.07846	0.488422	-0.69282	0.0232525	0.352708	0.390084	0.204959
HIST1H2BD	0.0433081	2.02073	0.77283	0.288675	0.046068	0.872725	0.66204	0.236899
HIST1H2BM	0.0376669	2.07846	0.729034	-0.34641	0.0339666	0.319556	0.598903	0.701181
HIST1H2BN	0.0496472	-1.96299	0.603332	0.519615	0.0212936	0.979036	0.127223	0.295633
HK3	0.0153138	2.42487	0.77283	0.288675	0.0142043	0.776706	0.526941	0.33658
HMBS	0.00268017	3.00222	0.77283	-0.288675	0.00120885	0.57677	0.155544	0.880984
HMGN3	0.0130425	-2.48261	1	0	0.0201549	0.424176	0.242899	0.592636
HMOX1	0.0326634	2.1362	0.488422	-0.69282	0.0273277	0.743866	0.576003	0.679451
HMSD	0.0326634	2.1362	0.603332	-0.519615	0.0353966	0.700134	0.604075	0.473222
HNRNPA1P33	0.0209213	-2.3094	0.86249	-0.173205	0.0335333	0.929293	0.487	0.524519
HOXC-AS2	0.0110744	-2.54034	0.0782522	-1.76092	0.0034477	0.782167	0.267102	0.18968
HOXC13	0.00665673	-2.71355	0.45292	-0.750555	0.0138945	0.22469	0.811033	0.9259
HPRT1	0.0179263	2.36714	0.418923	0.80829	0.0161488	0.509472	0.666481	0.280344
HRH2	0.0130425	2.48261	0.165857	-1.38564	0.0224719	0.808366	0.792041	0.437831
HSBP1	0.0243434	2.25167	0.488422	0.69282	0.0104249	0.254812	0.703171	0.413239
HSD17B2	0.0243434	2.25167	0.204024	1.27017	0.0104393	0.658864	0.493933	0.142912
HSD3B1	0.00268017	-3.00222	0.729034	0.34641	0.00187688	0.877002	0.78885	0.998586
HTR1D	0.0463866	-1.99186	0.272656	1.09697	0.0395383	0.767193	0.682333	0.634341
IBA57-AS1	0.0243434	-2.25167	0.0940686	1.67432	0.0147001	0.698578	0.238591	0.28257
IFFO2	0.0243434	-2.25167	0.686106	-0.404145	0.00640023	0.661647	0.0821718	0.333497
IFITM1	0.0130425	2.48261	0.908073	-0.11547	0.0481232	0.972521	0.732387	0.684159
IFNW1	0.0179263	-2.36714	0.644167	0.46188	0.0180208	0.810744	0.578136	0.282013
IGHG1	0.00665673	-2.71355	0.488422	-0.69282	0.0299555	0.953891	0.519862	0.826004
IGHV3-20	0.00937477	-2.59808	0.355611	-0.92376	0.024959	0.405217	0.758069	0.441913
IGHV4-39	0.00937477	-2.59808	0.0734883	1.78979	0.00606653	0.554409	0.909451	0.798045
IGKV1-37	0.0326634	2.1362	0.488422	-0.69282	0.0360338	0.94642	0.295086	0.677196
IGKV3-7	0.00937477	-2.59808	0.386476	0.866025	0.0106455	0.988827	0.805241	0.265266
IGSF23	0.0130425	-2.48261	0.95396	-0.057735	0.0150908	0.845795	0.770672	0.449428
IL13	0.00937477	-2.59808	0.686106	0.404145	0.00216387	0.219992	0.867291	0.188189
IL18BP	0.0153138	-2.42487	0.248213	1.1547	0.00380389	0.892782	0.088464	0.284708
IL1RL1	0.00323491	2.94449	0.563703	0.57735	0.014581	0.431666	0.486537	0.424972
IL22	0.0243434	-2.25167	0.95396	0.057735	0.0174978	0.602548	0.68809	0.28869
IL22RA1	0.0110744	2.54034	0.95396	0.057735	0.0243421	0.938987	0.94894	0.736189
IL32	0.00937477	2.59808	0.0567468	-1.90526	0.0166083	0.800385	0.968635	0.53819
ILVBL	0.00791179	-2.65581	0.563703	0.57735	0.0123821	0.561656	0.684345	0.239924
INPP5B	0.0282404	-2.19393	0.729034	-0.34641	0.0160536	0.29319	0.228689	0.197973
INTS7	0.0243434	2.25167	0.225346	-1.21244	0.0180996	0.772941	0.44639	0.407571
IPO13	0.0130425	2.48261	0.272656	-1.09697	0.0497923	0.701026	0.289555	0.531246
IZUMO1R	0.0130425	2.48261	0.105969	1.61658	0.00886822	0.330229	0.170721	0.760355
KALRN	0.00558362	2.77128	0.525373	-0.635085	0.0140085	0.581204	0.990664	0.311331
KCNH3	0.00323491	-2.94449	0.119033	-1.55885	0.00697267	0.688825	0.810975	0.961113
KCNJ1	0.0243434	2.25167	0.45292	0.750555	0.0268763	0.873062	0.632175	0.351527
KCNJ11	0.0496472	-1.96299	0.0832645	1.73205	0.0379257	0.987918	0.274462	0.334158
KCNN1	0.0153138	-2.42487	0.0646717	-1.84752	0.0194143	0.752733	0.633577	0.711716
KCNV1	0.0243434	-2.25167	0.729034	0.34641	0.0152572	0.178502	0.828925	0.321217
KCTD4	0.0209213	2.3094	0.86249	0.173205	0.00817452	0.73006	0.0935358	0.436696
KDM5B	0.0326634	-2.1362	0.45292	-0.750555	0.0189801	0.497676	0.137823	0.612772
KDM8	0.0282404	-2.19393	0.386476	-0.866025	0.0258338	0.703047	0.459459	0.335914
KHNYN	0.0496472	-1.96299	0.45292	-0.750555	0.0104293	0.383943	0.0927041	0.839989
KIF24	0.0209213	-2.3094	0.95396	0.057735	0.01549	0.499699	0.300744	0.321441
KIF5C	0.0243434	2.25167	0.908073	-0.11547	0.037222	0.996103	0.354991	0.976787
KIF9	0.0282404	-2.19393	0.525373	0.635085	0.0408084	0.712051	0.642747	0.392352
KLC2	0.00558362	-2.77128	1	0	0.00581811	0.464533	0.902756	0.230064
KLF2	0.00791179	2.65581	0.86249	0.173205	0.023767	0.910865	0.76526	0.862701
KLHL18	0.00791179	2.65581	0.908073	0.11547	0.037318	0.868323	0.483103	0.519558
KLHL5	0.0376669	-2.07846	0.488422	0.69282	0.0326862	0.971348	0.340095	0.457838
KLRG1	0.0153138	2.42487	0.272656	-1.09697	0.0305167	0.866374	0.447193	0.534569
KPTN	0.00665673	-2.71355	0.817361	0.23094	0.0124674	0.493953	0.295618	0.965466
KRT16P3	0.0496472	-1.96299	0.298698	-1.03923	0.0111188	0.986215	0.716277	0.106115
KRT35	0.0110744	2.54034	0.77283	-0.288675	0.0113906	0.539969	0.704534	0.647811
KRTAP13-2	0.0496472	1.96299	0.817361	0.23094	0.0373517	0.658433	0.300448	0.401889
KRTAP20-1	0.0153138	-2.42487	0.165857	-1.38564	0.0198133	0.662522	0.50985	0.16443
KRTAP4-11	0.00149616	3.17543	0.77283	-0.288675	0.00206719	0.739022	0.804648	0.374617
KRTAP8-1	0.0243434	2.25167	0.603332	0.519615	0.00635537	0.233568	0.128321	0.362223
KSR2	0.00389242	-2.88675	0.77283	-0.288675	0.00147861	0.25164	0.103288	0.615771
LANCL1	0.0326634	-2.1362	0.729034	-0.34641	0.025794	0.580994	0.208412	0.55227
LCOR	0.0179263	-2.36714	0.77283	-0.288675	0.033957	0.624963	0.505828	0.577802
LECT1	0.0209213	-2.3094	0.355611	0.92376	0.038283	0.682361	0.808182	0.888999
LGALS4	0.0179263	-2.36714	0.386476	0.866025	0.0185183	0.736341	0.630648	0.382314
LGI2	0.000275504	-3.63731	0.165857	1.38564	0.00114431	0.603465	0.975712	0.539863
LHB	0.00558362	-2.77128	0.95396	-0.057735	0.00207862	0.710003	0.358278	0.855377
LHX3	0.00466913	-2.82902	0.95396	0.057735	0.00353042	0.962475	0.4646	0.666521
LIG4	0.0130425	2.48261	0.603332	0.519615	0.0148849	0.573904	0.947369	0.295071
LINC00254	0.0496472	-1.96299	0.686106	-0.404145	0.0457771	0.638448	0.747011	0.208878
LINC00266-3	0.0209213	-2.3094	0.603332	0.519615	0.00484057	0.618023	0.701597	0.677874
LINC00309	0.0209213	-2.3094	0.45292	0.750555	0.0354205	0.715439	0.479496	0.436917
LINC00331	0.0282404	-2.19393	0.204024	1.27017	0.0499695	0.450965	0.805267	0.391445
LINC00445	0.0153138	-2.42487	0.729034	-0.34641	0.0326524	0.985207	0.552679	0.70878
LINC00475	0.00665673	-2.71355	0.885234	-0.144338	0.016821	0.756643	0.86956	0.423823
LINC00523	0.0209213	2.3094	0.272656	1.09697	0.0210955	0.786127	0.537311	0.444579
LINC00527	0.0110744	-2.54034	0.119033	1.55885	0.00953247	0.936032	0.297578	0.81155
LINC00581	0.0243434	-2.25167	0.817361	0.23094	0.0225609	0.448925	0.642536	0.507092
LINC00582	0.0433081	-2.02073	0.95396	-0.057735	0.0361053	0.904778	0.402967	0.528059
LINC00595	0.0130425	2.48261	0.817361	-0.23094	0.0027636	0.44192	0.670537	0.06312
LINC00633	0.0243434	2.25167	0.686106	-0.404145	0.0201462	0.941854	0.0985395	0.824405
LINC00661	0.0326634	2.1362	0.525373	-0.635085	0.00919725	0.757935	0.160023	0.298135
LINC00670	0.0433081	2.02073	0.729034	-0.34641	0.0325723	0.610327	0.722196	0.318778
LINC00675	0.00389242	2.88675	0.563703	0.57735	0.000339283	0.317716	0.122264	0.130647
LINC00677	0.0326634	2.1362	0.86249	0.173205	0.0192136	0.558772	0.977228	0.262925
LINC00685	0.0130425	-2.48261	0.298698	1.03923	0.0190049	0.914955	0.315628	0.669878
LINC00703	0.0376669	-2.07846	0.729034	-0.34641	0.0228033	0.512002	0.308173	0.405286
LINC00895	0.0209213	2.3094	0.133327	-1.50111	0.037518	0.933782	0.437174	0.741471
LINC00997	0.0376669	2.07846	0.563703	0.57735	0.0290311	0.944057	0.585876	0.460822
LINC01012	0.0376669	-2.07846	0.95396	0.057735	0.0401934	0.390713	0.675477	0.617974
LINC01022	0.0120228	2.51147	0.184209	1.32791	0.00864194	0.592316	0.355148	0.31975
LINC01052	0.0179263	-2.36714	0.326348	0.981495	0.0473662	0.564767	0.710735	0.891131
LINC01065	0.0130425	-2.48261	0.603332	-0.519615	0.0365879	0.716823	0.359219	0.739795
LINC01173	0.00665673	2.71355	0.729034	-0.34641	0.0211245	0.904304	0.761728	0.657405
LINC01179	0.0282404	2.19393	1	0	0.0339743	0.779447	0.399006	0.510377
LINC01230	0.00937477	2.59808	0.86249	-0.173205	0.0027069	0.478046	0.0560014	0.978998
LINC01257	0.0496472	1.96299	0.488422	-0.69282	0.0274183	0.759756	0.319719	0.518647
LINC01264	0.0282404	-2.19393	1	0	0.0434353	0.420223	0.703338	0.352399
LINC01356	0.00791179	-2.65581	0.326348	0.981495	0.00596648	0.940458	0.473504	0.322256
LINC01358	0.0209213	2.3094	0.817361	-0.23094	0.0150222	0.382999	0.98572	0.314481
LINC01415	0.0376669	-2.07846	0.184209	-1.32791	0.0243452	0.310587	0.246222	0.983921
LINC01429	0.0433081	2.02073	0.686106	-0.404145	0.0199818	0.294212	0.0826341	0.456917
LINC01460	0.00937477	2.59808	0.908073	-0.11547	0.0246002	0.580457	0.679429	0.282229
LINC01461	0.00937477	-2.59808	0.204024	-1.27017	0.0270093	0.966583	0.793196	0.811053
LINC01500	0.0179263	-2.36714	0.77283	-0.288675	0.0132808	0.899715	0.869746	0.148998
LINC01548	0.0153138	-2.42487	0.488422	0.69282	0.0103275	0.992446	0.165999	0.709655
LINC01581	0.00558362	-2.77128	0.95396	-0.057735	0.0377023	0.472215	0.567788	0.965836
LINC01585	0.0282404	-2.19393	0.77283	0.288675	0.0210241	0.88056	0.396079	0.834976
LINC01602	0.0496472	1.96299	0.272656	1.09697	0.0233295	0.962663	0.214291	0.441396
LINGO4	0.0496472	1.96299	0.644167	-0.46188	0.0477122	0.472614	0.424095	0.562437
LIPE-AS1	0.0433081	-2.02073	0.86249	-0.173205	0.0188732	0.897679	0.226022	0.856228
LMX1B	0.0209213	2.3094	0.45292	0.750555	0.0437214	0.925632	0.653917	0.540993
LOC100128437	0.0153138	2.42487	0.386476	0.866025	0.0488243	0.791083	0.424519	0.762667
LOC100129138	0.0326634	-2.1362	0.603332	-0.519615	0.0133089	0.689231	0.590784	0.561585
LOC100129297	0.0243434	-2.25167	0.0567468	1.90526	0.0430151	0.943532	0.579754	0.36368
LOC100130992	0.0326634	2.1362	0.86249	-0.173205	0.0137691	0.681987	0.346648	0.139567
LOC100133077	0.00182274	-3.11769	0.355611	-0.92376	0.00128291	0.985997	0.302041	0.336965
LOC100288162	0.0376669	2.07846	0.355611	-0.92376	0.0207452	0.397707	0.859939	0.211006
LOC100288778	0.0433081	-2.02073	0.272656	1.09697	0.0162225	0.492736	0.113782	0.452052
LOC100289061	0.00323491	-2.94449	0.603332	-0.519615	0.00652091	0.520206	0.801195	0.270705
LOC100289361	0.0243434	-2.25167	0.817361	-0.23094	0.0288798	0.824087	0.479043	0.932477
LOC100289511	0.0130425	-2.48261	0.644167	0.46188	0.00967185	0.316968	0.433444	0.316084
LOC100289580	0.0496472	-1.96299	0.908073	-0.11547	0.0172842	0.33614	0.103106	0.446258
LOC100289673	0.0326634	2.1362	0.908073	0.11547	0.0374473	0.896708	0.750431	0.321219
LOC100506085	0.00323491	-2.94449	0.418923	-0.80829	0.0367787	0.869377	0.5849	0.54928
LOC100506679	0.0243434	2.25167	0.165857	-1.38564	0.0169085	0.429386	0.178093	0.838777
LOC100507006	0.0243434	2.25167	0.418923	0.80829	0.0209146	0.888185	0.818294	0.273843
LOC100507144	0.00389242	2.88675	0.204024	-1.27017	0.00554065	0.488228	0.272433	0.660439
LOC100507195	0.0153138	2.42487	0.148915	-1.44338	0.0302978	0.786965	0.651956	0.796136
LOC100508631	0.0153138	2.42487	0.248213	-1.1547	0.015478	0.918589	0.255922	0.464049
LOC100652901	0.0179263	2.36714	0.644167	0.46188	0.0346705	0.899363	0.207078	0.722474
LOC100652911	0.0130425	2.48261	0.563703	0.57735	0.0241165	0.80175	0.598574	0.523531
LOC100996437	0.00323491	-2.94449	0.644167	0.46188	0.00421684	0.880439	0.430813	0.593286
LOC101060038	0.0433081	2.02073	0.248213	-1.1547	0.0193033	0.934191	0.178772	0.548548
LOC101926886	0.0496472	-1.96299	0.603332	-0.519615	0.0433233	0.990377	0.57165	0.160913
LOC101926940	0.00323491	-2.94449	0.86249	-0.173205	0.00241224	0.503278	0.387444	0.314819
LOC101926943	0.0326634	-2.1362	0.817361	-0.23094	0.0112992	0.559854	0.354551	0.284668
LOC101926975	0.0179263	-2.36714	0.272656	1.09697	0.0258604	0.823674	0.761864	0.495882
LOC101926984	0.0433081	-2.02073	0.77283	0.288675	0.0460122	0.927537	0.545152	0.271025
LOC101927060	0.0376669	2.07846	0.148915	-1.44338	0.0310238	0.92175	0.421502	0.232618
LOC101927159	0.0243434	2.25167	0.908073	0.11547	0.0451666	0.647438	0.390478	0.862809
LOC101927187	0.00558362	-2.77128	0.644167	0.46188	0.0168321	0.966724	0.452413	0.662804
LOC101927204	0.00665673	2.71355	0.95396	-0.057735	0.0337214	0.740273	0.482878	0.677054
LOC101927277	0.0209213	-2.3094	0.95396	-0.057735	0.020452	0.465402	0.497222	0.738982
LOC101927285	0.00665673	2.71355	0.58336	-0.548483	0.00708936	0.717009	0.276211	0.748748
LOC101927329	0.0282404	-2.19393	0.225346	-1.21244	0.0461681	0.708747	0.547574	0.602647
LOC101927513	0.00122428	3.23316	0.133327	1.50111	0.00772339	0.925067	0.858488	0.58919
LOC101927632	0.0179263	-2.36714	0.470486	0.721688	0.0259247	0.753634	0.703992	0.477069
LOC101927711	0.0282404	-2.19393	0.729034	-0.34641	0.048512	0.951849	0.663273	0.739063
LOC101927888	0.0179263	-2.36714	0.817361	0.23094	0.0470641	0.878596	0.877242	0.816481
LOC101927896	0.000344158	-3.57957	0.0940686	-1.67432	0.000535312	0.506656	0.91486	0.574192
LOC101928015	0.0376669	-2.07846	0.488422	-0.69282	0.0205361	0.813017	0.186555	0.43539
LOC101928039	0.0496472	1.96299	0.272656	-1.09697	0.0398642	0.679809	0.250488	0.98404
LOC101928093	0.00389242	-2.88675	0.644167	0.46188	0.0371435	0.875953	0.702783	0.752697
LOC101928203	0.000998686	-3.2909	0.908073	0.11547	0.000999897	0.860693	0.912646	0.922
LOC101928264	0.0326634	2.1362	0.77283	0.288675	0.0495851	0.711707	0.455107	0.388812
LOC101928280	0.0496472	-1.96299	0.326348	-0.981495	0.0425245	0.591147	0.450091	0.687772
LOC101928491	0.0243434	-2.25167	0.418923	0.80829	0.0284604	0.584369	0.479912	0.781411
LOC101928618	0.00323491	-2.94449	0.603332	0.519615	0.00809701	0.874456	0.777391	0.657116
LOC101928791	0.0110744	2.54034	0.105969	-1.61658	0.00102695	0.250095	0.238941	0.356644
LOC101928978	0.0179263	2.36714	0.165857	-1.38564	0.0125396	0.297052	0.424511	0.79827
LOC101929099	0.00268017	3.00222	0.86249	0.173205	0.0164178	0.647669	0.924031	0.550781
LOC101929312	0.00791179	2.65581	0.729034	-0.34641	0.0124273	0.831166	0.965565	0.679661
LOC101929384	0.0376669	-2.07846	0.488422	-0.69282	0.0491893	0.358499	0.763455	0.766262
LOC101929552	0.0376669	2.07846	0.355611	-0.92376	0.034567	0.226114	0.248135	0.555978
LOC101929572	0.0376669	2.07846	0.95396	-0.057735	0.0197117	0.535019	0.209723	0.840506
LOC101929575	0.0209213	-2.3094	0.563703	-0.57735	0.0311582	0.950557	0.631651	0.409068
LOC101929897	0.0376669	2.07846	0.298698	1.03923	0.00894173	0.171565	0.1254	0.555571
LOC101930149	0.0179263	2.36714	0.386476	-0.866025	0.0222544	0.943528	0.783943	0.518378
LOC102477328	0.0433081	2.02073	0.817361	-0.23094	0.0409916	0.958574	0.160177	0.936156
LOC102723507	0.0326634	-2.1362	0.525373	0.635085	0.0451444	0.607095	0.328435	0.938951
LOC102723649	0.0433081	-2.02073	0.525373	0.635085	0.0341455	0.64458	0.559975	0.366663
LOC102723701	0.0209213	-2.3094	0.418923	0.80829	0.0432946	0.793291	0.86344	0.431896
LOC102724064	0.0179263	-2.36714	0.0940686	1.67432	0.00992356	0.74217	0.279455	0.394765
LOC102724094	0.0209213	2.3094	0.86249	-0.173205	0.0247357	0.843634	0.625647	0.866327
LOC102724148	0.00221369	-3.05996	0.119033	1.55885	0.00264306	0.397654	0.756012	0.749245
LOC102724212	0.0110744	2.54034	0.386476	-0.866025	0.0240856	0.784596	0.338426	0.383469
LOC102724289	0.0179263	-2.36714	0.525373	-0.635085	0.0214707	0.41003	0.650198	0.375869
LOC102724392	0.0153138	2.42487	0.355611	-0.92376	0.0296607	0.867785	0.279851	0.677151
LOC102724427	0.00323491	2.94449	0.729034	-0.34641	0.00187443	0.609037	0.615236	0.124575
LOC102724542	0.0130425	2.48261	1	0	0.0169187	0.974856	0.392406	0.402148
LOC102724553	0.0179263	-2.36714	0.603332	-0.519615	0.041781	0.640278	0.765895	0.82478
LOC102724708	0.00323491	-2.94449	0.95396	-0.057735	0.0117625	0.857635	0.459543	0.104596
LOC102724777	0.0243434	2.25167	0.119033	1.55885	0.0282062	0.936194	0.335444	0.524006
LOC102724805	0.00937477	2.59808	0.225346	-1.21244	0.0166286	0.69545	0.84236	0.947895
LOC102724830	0.0130425	-2.48261	0.563703	0.57735	0.0100533	0.923004	0.788904	0.172567
LOC105369341	0.0243434	-2.25167	0.686106	-0.404145	0.0309419	0.985444	0.274535	0.820083
LOC105369378	0.0153138	2.42487	0.418923	0.80829	0.0449966	0.726273	0.428861	0.892982
LOC105369427	0.00937477	2.59808	0.488422	0.69282	0.00912612	0.485561	0.564246	0.36584
LOC105369443	0.00937477	-2.59808	0.418923	-0.80829	0.00454798	0.165732	0.17984	0.972716
LOC105369549	0.0326634	2.1362	0.355611	-0.92376	0.0410596	0.317294	0.47436	0.307377
LOC105369609	0.00791179	2.65581	1	0	0.0361032	0.917279	0.719322	0.392103
LOC105369622	0.00665673	-2.71355	0.644167	0.46188	0.00800957	0.771098	0.861129	0.440067
LOC105369635	0.00937477	-2.59808	0.165857	1.38564	0.0195636	0.902272	0.677696	0.981261
LOC105369911	0.00558362	-2.77128	0.729034	0.34641	0.0176941	0.938805	0.99232	0.745737
LOC105369921	0.0153138	-2.42487	0.77283	-0.288675	0.0223462	0.454339	0.641382	0.498112
LOC105369926	0.0179263	2.36714	0.204024	1.27017	0.0229284	0.713898	0.463564	0.56152
LOC105370107	0.0209213	-2.3094	0.817361	0.23094	0.0178769	0.975156	0.544133	0.523808
LOC105370400	0.00558362	2.77128	0.45292	-0.750555	0.0399556	0.709827	0.340367	0.953132
LOC105370409	0.0153138	-2.42487	0.355611	0.92376	0.0494318	0.966933	0.847592	0.344955
LOC105370435	0.0179263	2.36714	0.563703	-0.57735	0.0113497	0.579847	0.447206	0.66048
LOC105370448	0.0110744	2.54034	0.686106	-0.404145	0.0161039	0.724091	0.897915	0.471245
LOC105370527	0.0243434	-2.25167	0.148915	1.44338	0.0318652	0.865215	0.37018	0.349173
LOC105370689	0.0179263	2.36714	0.817361	0.23094	0.00662583	0.542833	0.281016	0.363432
LOC105370777	0.0243434	-2.25167	0.204024	-1.27017	0.0190141	0.308217	0.376814	0.666696
LOC105370778	0.00323491	-2.94449	0.908073	0.11547	0.00144991	0.321332	0.735649	0.421093
LOC105370817	0.0282404	2.19393	0.686106	-0.404145	0.0206806	0.666407	0.496894	0.281787
LOC105371238	0.00268017	-3.00222	0.817361	-0.23094	0.0020556	0.344216	0.555515	0.878322
LOC105371244	0.0153138	-2.42487	0.0646717	-1.84752	0.0383744	0.664059	0.707195	0.505071
LOC105371347	0.00791179	-2.65581	0.165857	1.38564	0.0301911	0.818824	0.404311	0.508037
LOC105371465	0.0209213	2.3094	0.95396	-0.057735	0.0172769	0.854863	0.193957	0.950246
LOC105371574	0.0496472	-1.96299	0.148915	-1.44338	0.0476184	0.59377	0.486868	0.391193
LOC105371592	0.0326634	-2.1362	0.326348	-0.981495	0.0480499	0.70992	0.212217	0.448094
LOC105371679	0.0376669	2.07846	0.686106	-0.404145	0.0186656	0.365408	0.159757	0.708809
LOC105371757	0.0282404	-2.19393	0.644167	0.46188	0.0468052	0.692862	0.534204	0.855606
LOC105371965	0.00665673	2.71355	0.418923	-0.80829	0.0155933	0.831245	0.600391	0.292277
LOC105372276	0.0243434	-2.25167	0.686106	0.404145	0.0189683	0.657075	0.864721	0.218005
LOC105372292	0.0282404	-2.19393	0.0940686	1.67432	0.0414028	0.320907	0.657893	0.587185
LOC105372839	0.00937477	-2.59808	0.686106	-0.404145	0.0138882	0.494739	0.882322	0.465271
LOC105372870	0.00937477	-2.59808	0.95396	-0.057735	0.0353377	0.966388	0.573651	0.912609
LOC105372969	0.00466913	2.82902	0.603332	0.519615	0.0100586	0.764413	0.616261	0.67586
LOC105372988	0.00937477	2.59808	0.119033	-1.55885	0.0232766	0.433908	0.526156	0.65762
LOC105373032	0.0110744	-2.54034	0.355611	0.92376	0.044793	0.854833	0.535272	0.470512
LOC105373098	0.0282404	2.19393	0.272656	-1.09697	0.0212554	0.315856	0.189969	0.773738
LOC105373153	0.0153138	2.42487	0.326348	-0.981495	0.0343756	0.764519	0.393876	0.647959
LOC105373180	0.0326634	2.1362	0.272656	-1.09697	0.0197108	0.888076	0.140325	0.711965
LOC105373215	0.0376669	2.07846	0.525373	-0.635085	0.0123006	0.856391	0.599381	0.11652
LOC105373256	0.0209213	2.3094	0.644167	-0.46188	0.00611548	0.552695	0.0928689	0.698512
LOC105373311	0.0130425	-2.48261	0.418923	0.80829	0.0125652	0.928926	0.91728	0.116758
LOC105373323	0.00791179	-2.65581	0.148915	1.44338	0.0195074	0.949194	0.573462	0.672264
LOC105373416	0.0326634	2.1362	0.298698	1.03923	0.0387386	0.806207	0.953017	0.737249
LOC105373436	0.00268017	3.00222	0.326348	-0.981495	0.00822773	0.795417	0.462876	0.420202
LOC105373537	0.00791179	-2.65581	0.355611	0.92376	0.0204858	0.977597	0.91267	0.663824
LOC105373614	0.0153138	-2.42487	0.86249	-0.173205	0.0290015	0.658356	0.681351	0.929113
LOC105373696	0.00791179	-2.65581	0.86249	-0.173205	0.0129322	0.291223	0.633808	0.541196
LOC105373749	0.0496472	-1.96299	0.77283	0.288675	0.044502	0.266185	0.938673	0.637766
LOC105373751	0.00937477	-2.59808	0.525373	0.635085	0.0386459	0.697554	0.664335	0.245005
LOC105373760	0.00558362	-2.77128	0.603332	0.519615	0.00355922	0.214245	0.131077	0.508884
LOC105373834	0.0433081	2.02073	0.418923	-0.80829	0.0346984	0.775863	0.2459	0.635455
LOC105373864	0.0243434	-2.25167	0.563703	0.57735	0.0141936	0.657894	0.602703	0.162048
LOC105374219	0.00323491	-2.94449	1	0	0.0104343	0.623319	0.624326	0.49355
LOC105374266	0.0243434	2.25167	0.386476	0.866025	0.00824546	0.496237	0.422389	0.139589
LOC105374308	0.0376669	-2.07846	0.184209	1.32791	0.0420233	0.735965	0.747059	0.460391
LOC105374374	0.0326634	2.1362	0.272656	-1.09697	0.0180873	0.392372	0.92131	0.249889
LOC105374382	0.0153138	-2.42487	0.95396	0.057735	0.0172897	0.808315	0.517292	0.351025
LOC105374419	0.00665673	2.71355	0.355611	-0.92376	0.000599943	0.210812	0.156757	0.351588
LOC105374425	0.0376669	2.07846	0.908073	0.11547	0.0172229	0.645676	0.110309	0.71843
LOC105374449	0.0179263	-2.36714	0.248213	1.1547	0.0343798	0.754667	0.956207	0.638442
LOC105374546	0.0496472	-1.96299	0.686106	-0.404145	0.0498166	0.308659	0.872894	0.513275
LOC105374707	0.0496472	-1.96299	0.95396	-0.057735	0.0479521	0.56824	0.580204	0.839042
LOC105374825	0.0433081	-2.02073	0.86249	-0.173205	0.0168368	0.319923	0.1951	0.579904
LOC105374911	0.0243434	-2.25167	0.225346	1.21244	0.0155868	0.737504	0.538343	0.290359
LOC105374942	0.0209213	2.3094	0.908073	0.11547	0.0357351	0.492464	0.614993	0.726596
LOC105374971	0.00665673	-2.71355	0.184209	1.32791	0.0148287	0.86788	0.659131	0.850972
LOC105375044	0.0209213	2.3094	0.386476	-0.866025	0.0168377	0.383007	0.16006	0.748426
LOC105375166	0.00389242	2.88675	0.45292	0.750555	0.00211393	0.917498	0.111712	0.462882
LOC105375207	0.0433081	2.02073	0.326348	-0.981495	0.025295	0.516507	0.460923	0.357319
LOC105375240	0.0282404	2.19393	0.77283	0.288675	0.030238	0.815162	0.368597	0.67006
LOC105375361	0.0496472	1.96299	0.86249	-0.173205	0.0335868	0.615172	0.417692	0.357816
LOC105375419	0.0179263	2.36714	0.355611	-0.92376	0.0280763	0.447899	0.613228	0.884187
LOC105375429	0.0110744	-2.54034	0.77283	-0.288675	0.0244547	0.873888	0.766586	0.543332
LOC105375441	0.0376669	2.07846	0.488422	-0.69282	0.0464782	0.915965	0.53983	0.943253
LOC105375505	0.0209213	2.3094	0.488422	0.69282	0.0402445	0.771454	0.765412	0.515767
LOC105375547	0.0282404	2.19393	0.272656	-1.09697	0.0448413	0.903805	0.616542	0.756962
LOC105375588	0.00937477	-2.59808	0.488422	-0.69282	0.0259259	0.461146	0.198079	0.948074
LOC105375798	0.00323491	-2.94449	0.386476	-0.866025	0.00261392	0.556539	0.849441	0.963849
LOC105376011	0.0179263	2.36714	0.225346	-1.21244	0.0480011	0.981165	0.51018	0.456821
LOC105376063	0.0282404	2.19393	0.435731	-0.779423	0.0157251	0.566294	0.283224	0.744691
LOC105376066	0.00182274	3.11769	0.418923	-0.80829	0.00144775	0.368188	0.166573	0.720153
LOC105376133	0.0282404	2.19393	0.386476	0.866025	0.0442568	0.933867	0.700916	0.294984
LOC105376366	0.0209213	2.3094	0.326348	-0.981495	0.0273884	0.821101	0.342711	0.492082
LOC105376380	0.0130425	2.48261	0.729034	0.34641	0.0173629	0.948496	0.675567	0.24668
LOC105376383	0.0209213	-2.3094	0.45292	-0.750555	0.0333873	0.883737	0.843129	0.490662
LOC105376386	0.0243434	2.25167	0.686106	0.404145	0.0481519	0.664958	0.387107	0.590043
LOC105376434	0.0282404	-2.19393	0.418923	0.80829	0.0368888	0.648759	0.48975	0.405597
LOC105376550	0.00323491	2.94449	0.204024	1.27017	0.00464394	0.324102	0.840729	0.87687
LOC105376635	0.00791179	-2.65581	0.326348	0.981495	0.0186439	0.525579	0.845026	0.353029
LOC105376685	0.0243434	-2.25167	0.908073	-0.11547	0.0480727	0.56143	0.844772	0.599122
LOC105376868	0.0110744	-2.54034	0.817361	0.23094	0.0194121	0.918732	0.847771	0.716795
LOC105377166	0.00558362	-2.77128	0.77283	-0.288675	0.00440471	0.505348	0.35368	0.854418
LOC105377307	0.00791179	2.65581	0.86249	0.173205	0.00704624	0.474721	0.261154	0.492102
LOC105377338	0.00791179	2.65581	0.77283	-0.288675	0.0112339	0.871862	0.595072	0.737339
LOC105377352	0.0130425	-2.48261	0.908073	-0.11547	0.024617	0.972975	0.841077	0.780483
LOC105377587	0.0153138	2.42487	0.204024	1.27017	0.032795	0.646783	0.849974	0.324319
LOC105377591	0.0433081	-2.02073	0.165857	1.38564	0.0216265	0.717711	0.366814	0.376538
LOC105377625	0.0243434	2.25167	0.488422	-0.69282	0.0271269	0.851673	0.683112	0.639974
LOC105377770	0.0326634	-2.1362	0.686106	0.404145	0.0299153	0.468832	0.593513	0.320473
LOC105377871	0.0209213	-2.3094	0.184209	-1.32791	0.042681	0.66435	0.901562	0.246503
LOC105377980	0.00791179	2.65581	0.0940686	-1.67432	0.0229447	0.946553	0.851736	0.327148
LOC105377991	0.0153138	-2.42487	0.729034	-0.34641	0.0457565	0.583399	0.339988	0.246201
LOC105378066	0.0496472	1.96299	0.326348	-0.981495	0.028866	0.625688	0.494377	0.181675
LOC105378073	0.0179263	2.36714	0.45292	0.750555	0.0321673	0.910434	0.282183	0.694301
LOC105378091	0.0496472	1.96299	0.119033	1.55885	0.00613644	0.274754	0.0933429	0.256358
LOC105378269	0.0376669	-2.07846	0.95396	-0.057735	0.0239979	0.464657	0.414365	0.327289
LOC105378360	0.0326634	2.1362	0.326348	-0.981495	0.0340105	0.451958	0.40984	0.742173
LOC105378488	0.0433081	-2.02073	0.204024	1.27017	0.0169046	0.528761	0.269968	0.423567
LOC105378568	0.00149616	-3.17543	0.77283	-0.288675	0.00154095	0.877531	0.283418	0.332478
LOC105378657	0.0326634	2.1362	0.298698	-1.03923	0.0253655	0.940296	0.208888	0.924089
LOC105378668	0.0243434	-2.25167	0.119033	-1.55885	0.0193102	0.62561	0.271972	0.419642
LOC105378786	0.0243434	-2.25167	0.488422	-0.69282	0.0236655	0.668266	0.753334	0.520588
LOC105378810	0.0110744	2.54034	0.184209	-1.32791	0.0158071	0.77629	0.608499	0.46748
LOC105379005	0.0209213	2.3094	0.204024	-1.27017	0.017748	0.910572	0.231857	0.645542
LOC105379033	0.00426476	-2.85788	0.729034	0.34641	0.0194307	0.831198	0.665022	0.712834
LOC105379040	0.0496472	1.96299	0.488422	-0.69282	0.0190061	0.512644	0.447572	0.158813
LOC105379051	0.0179263	-2.36714	0.418923	-0.80829	0.014084	0.54977	0.488402	0.0910779
LOC105379146	0.0179263	-2.36714	0.525373	0.635085	0.0178132	0.875397	0.311392	0.625493
LOC105379175	0.0179263	-2.36714	0.729034	-0.34641	0.0332546	0.461465	0.41985	0.646343
LOC105379193	0.0179263	-2.36714	0.77283	0.288675	0.0225323	0.502986	0.450956	0.310596
LOC105379234	0.0209213	-2.3094	0.488422	0.69282	0.0282107	0.960397	0.79666	0.605832
LOC105379242	0.0130425	2.48261	0.77283	0.288675	0.0238271	0.856335	0.689369	0.728474
LOC105379272	0.0243434	2.25167	0.686106	-0.404145	0.0130575	0.484215	0.265296	0.465121
LOC105379289	0.0282404	2.19393	0.326348	-0.981495	0.0478772	0.675136	0.8111	0.865954
LOC105379377	0.0179263	-2.36714	0.908073	0.11547	0.0225777	0.665289	0.328692	0.744194
LOC105379521	0.00791179	-2.65581	0.165857	1.38564	0.0263376	0.887761	0.72669	0.273832
LOC105379592	0.0496472	-1.96299	0.148915	1.44338	0.0471323	0.870434	0.247616	0.587967
LOC105379715	0.0179263	-2.36714	0.77283	0.288675	0.0259196	0.634447	0.584162	0.317531
LOC105379769	0.0153138	2.42487	0.386476	-0.866025	0.0151334	0.567987	0.275273	0.677023
LOC105379881	0.00323491	2.94449	0.248213	-1.1547	0.0120657	0.490536	0.687934	0.956402
LOC113230	0.00122428	-3.23316	0.77283	-0.288675	0.00218674	0.448799	0.797888	0.922758
LOC150776	0.0153138	-2.42487	0.77283	-0.288675	0.0180343	0.723924	0.760491	0.455144
LOC152225	0.00323491	-2.94449	0.148915	1.44338	0.0132049	0.831049	0.435571	0.816901
LOC171391	0.00466913	-2.82902	0.272656	1.09697	0.00653315	0.449817	0.879745	0.778947
LOC283665	0.0153138	-2.42487	0.386476	-0.866025	0.0269461	0.641199	0.54902	0.796283
LOC284023	0.0326634	2.1362	0.0734883	1.78979	0.0237796	0.650707	0.216518	0.868813
LOC389033	0.0153138	2.42487	0.95396	-0.057735	0.0264343	0.618809	0.542315	0.775385
LOC389199	0.00182274	-3.11769	0.686106	0.404145	0.00118794	0.658063	0.413888	0.717791
LOC400622	0.0376669	2.07846	0.525373	-0.635085	0.0417539	0.68691	0.371079	0.327199
LOC401554	0.00665673	2.71355	0.77283	-0.288675	0.00667689	0.923516	0.206083	0.765996
LOC401585	0.00323491	-2.94449	0.488422	0.69282	0.00406478	0.359013	0.939013	0.223787
LOC440300	0.00558362	2.77128	0.298698	-1.03923	0.00696848	0.70758	0.148129	0.566535
LOC643072	0.0110744	-2.54034	0.386476	-0.866025	0.0434003	0.968425	0.606906	0.408474
LOC643623	0.0282404	-2.19393	0.603332	0.519615	0.029592	0.864679	0.811576	0.561146
LOC644656	0.00466913	2.82902	0.0734883	1.78979	0.00475844	0.602314	0.32796	0.512401
LOC644762	0.0130425	2.48261	0.86249	0.173205	0.0284366	0.779421	0.712451	0.468962
LOC644841	0.00665673	2.71355	0.148915	1.44338	0.00350139	0.915958	0.279889	0.761912
LOC654841	0.00937477	-2.59808	0.45292	0.750555	0.0077134	0.856899	0.178557	0.668618
LOC727710	0.00937477	-2.59808	0.525373	-0.635085	0.00327959	0.151758	0.255364	0.354024
LOC728208	0.0209213	-2.3094	0.525373	0.635085	0.0402389	0.624861	0.907031	0.593543
LOC728805	0.0130425	2.48261	0.77283	0.288675	0.00642519	0.406734	0.414789	0.543406
LOC729224	0.0376669	2.07846	0.45292	-0.750555	0.0259285	0.554476	0.481342	0.642488
LOC729307	0.0209213	-2.3094	0.272656	1.09697	0.0127193	0.406179	0.167624	0.745253
LRFN2	0.00182274	3.11769	0.686106	0.404145	0.000685347	0.425076	0.151941	0.579329
LRP3	0.00389242	2.88675	0.225346	1.21244	0.00823735	0.991763	0.525317	0.536183
LRRC37A5P	0.0179263	2.36714	0.729034	0.34641	0.0472073	0.742746	0.71926	0.674113
LRRC40	0.0496472	-1.96299	0.298698	-1.03923	0.0476045	0.618239	0.444706	0.64118
LRRN4CL	0.00558362	2.77128	0.686106	-0.404145	0.0190618	0.556694	0.622512	0.45001
LRRTM3	0.0179263	2.36714	0.525373	0.635085	0.0356072	0.543806	0.489207	0.670181
LTBP2	0.0243434	2.25167	0.95396	-0.057735	0.027366	0.692414	0.421595	0.979876
LVRN	0.0209213	-2.3094	0.418923	0.80829	0.0346622	0.71307	0.445117	0.60923
LY6G5C	0.0326634	2.1362	0.45292	0.750555	0.0295822	0.737452	0.139346	0.665425
LYRM4	0.00122428	3.23316	0.488422	0.69282	0.00112544	0.287454	0.38113	0.496716
MAGEA1	0.0496472	-1.96299	0.105969	-1.61658	0.0349664	0.521334	0.256351	0.602027
MAGEL2	0.0326634	2.1362	0.603332	-0.519615	0.0263756	0.839606	0.26741	0.718237
MANF	0.0282404	2.19393	0.298698	-1.03923	0.0348174	0.442819	0.48216	0.524656
MAP2K7	0.0433081	-2.02073	0.729034	-0.34641	0.0167403	0.304427	0.169147	0.324581
MAT2A	0.0326634	-2.1362	0.148915	-1.44338	0.0390781	0.625306	0.705574	0.536509
MBD3L1	0.0496472	1.96299	0.77283	0.288675	0.0462479	0.724814	0.216394	0.580241
MBD3L2	0.00791179	2.65581	0.525373	-0.635085	0.0186274	0.669282	0.197724	0.248298
MBLAC1	0.0326634	-2.1362	0.86249	0.173205	0.0309293	0.652501	0.35311	0.526027
ME3	0.0326634	2.1362	0.603332	-0.519615	0.0236178	0.809224	0.464444	0.74904
MED29	0.0243434	-2.25167	0.686106	0.404145	0.0378663	0.803578	0.391414	0.509721
MELK	0.0110744	2.54034	0.386476	-0.866025	0.0110735	0.583362	0.329001	0.307118
MERTK	0.00665673	2.71355	0.488422	-0.69282	0.0177736	0.948585	0.805988	0.21948
METRNL	0.0130425	2.48261	0.95396	0.057735	0.00454158	0.36508	0.572985	0.146896
METTL12	0.0243434	2.25167	0.488422	0.69282	0.0422332	0.91667	0.580553	0.37429
MIEN1	0.00268017	-3.00222	0.644167	-0.46188	0.00194951	0.724412	0.21317	0.476401
MIR105-1	0.0326634	2.1362	0.272656	-1.09697	0.0472597	0.825492	0.30345	0.916288
MIR1251	0.0376669	2.07846	0.603332	-0.519615	0.0496741	0.880399	0.474607	0.820003
MIR126	0.0243434	-2.25167	0.0734883	1.78979	0.00747692	0.580378	0.252333	0.391889
MIR130B	0.0326634	2.1362	0.184209	1.32791	0.0160379	0.778671	0.0924063	0.850413
MIR1322	0.0209213	-2.3094	0.204024	1.27017	0.028712	0.846032	0.419698	0.939088
MIR3138	0.0110744	2.54034	0.525373	0.635085	0.00767572	0.385796	0.24478	0.418443
MIR3177	0.00354984	2.91562	0.488422	-0.69282	0.0041187	0.751194	0.492855	0.90342
MIR329-1	0.0496472	-1.96299	0.418923	-0.80829	0.0311179	0.569257	0.262087	0.993272
MIR329-2	0.0282404	-2.19393	0.272656	1.09697	0.0190294	0.786849	0.349994	0.985528
MIR342	0.0243434	2.25167	0.326348	-0.981495	0.0441098	0.731372	0.245856	0.688534
MIR3914-1	0.0433081	-2.02073	0.686106	0.404145	0.00762785	0.788216	0.0863512	0.28925
MIR422A	0.0209213	2.3094	0.729034	0.34641	0.0398315	0.666907	0.654243	0.913378
MIR4255	0.0243434	-2.25167	0.817361	0.23094	0.0297204	0.717345	0.976479	0.274772
MIR4258	0.0179263	2.36714	0.95396	-0.057735	0.0151798	0.574306	0.770935	0.408135
MIR4300	0.0130425	-2.48261	0.355611	0.92376	0.0303035	0.985795	0.941134	0.809089
MIR4306	0.0496472	1.96299	0.225346	-1.21244	0.031533	0.493302	0.137159	0.608171
MIR4308	0.0209213	-2.3094	0.908073	-0.11547	0.0118134	0.850918	0.627509	0.486799
MIR4309	0.00323491	-2.94449	1	0	0.00409518	0.254283	0.698125	0.304952
MIR4474	0.0433081	2.02073	0.105969	-1.61658	0.0103593	0.483119	0.0855986	0.766111
MIR4487	0.00182274	-3.11769	0.77283	0.288675	0.00319008	0.722575	0.809967	0.613107
MIR4491	0.0376669	-2.07846	0.95396	-0.057735	0.0322195	0.761615	0.40052	0.497744
MIR4510	0.0243434	2.25167	0.930987	0.0866025	0.00787562	0.779573	0.0623838	0.374484
MIR4704	0.00149616	3.17543	0.133327	-1.50111	0.00461719	0.892997	0.228443	0.470436
MIR4762	0.000658337	-3.40637	0.644167	-0.46188	0.000572512	0.614404	0.466142	0.519321
MIR4771-1	0.0101931	2.56921	0.488422	-0.69282	0.0242593	0.835746	0.741972	0.877596
MIR4772	0.0130425	2.48261	0.0734883	-1.78979	0.0426799	0.499026	0.285618	0.760544
MIR4796	0.0282404	2.19393	0.204024	-1.27017	0.0285794	0.542023	0.412883	0.72667
MIR4803	0.0404041	-2.04959	0.77283	-0.288675	0.0359421	0.984828	0.350619	0.42638
MIR514A2	0.0110744	-2.54034	0.0940686	1.67432	0.0143612	0.833218	0.734072	0.938666
MIR518A2	0.00466913	-2.82902	0.0940686	1.67432	0.010963	0.799213	0.880498	0.631494
MIR519A1	0.0179263	-2.36714	0.686106	0.404145	0.0240863	0.787533	0.740848	0.458514
MIR520F	0.00122428	-3.23316	0.386476	0.866025	0.00331478	0.811122	0.652558	0.601652
MIR527	0.0433081	-2.02073	0.165857	1.38564	0.0159613	0.968164	0.651333	0.145402
MIR544A	0.0179263	-2.36714	0.298698	1.03923	0.041659	0.960236	0.62797	0.953405
MIR548XHG	0.0496472	1.96299	0.272656	-1.09697	0.0434924	0.517105	0.851506	0.759165
MIR591	0.0376669	-2.07846	0.45292	-0.750555	0.0239164	0.793932	0.118608	0.610885
MIR649	0.0243434	2.25167	0.525373	-0.635085	0.00603945	0.776532	0.263993	0.159966
MIR766	0.0326634	2.1362	0.95396	-0.057735	0.0452151	0.799385	0.497566	0.882261
MIR885	0.0496472	1.96299	0.908073	-0.11547	0.0437178	0.728948	0.142055	0.862809
MIRLET7E	0.0179263	-2.36714	0.488422	0.69282	0.0374088	0.727499	0.990998	0.832975
MKLN1-AS	0.0130425	2.48261	0.563703	-0.57735	0.0242907	0.285048	0.345735	0.584344
MMP2	0.00389242	2.88675	0.908073	-0.11547	0.0017107	0.271688	0.527497	0.61864
MNT	0.0243434	-2.25167	0.418923	0.80829	0.0187686	0.660861	0.181732	0.45352
MORN3	0.0243434	-2.25167	0.77283	0.288675	0.0394929	0.95074	0.481062	0.504058
MPG	0.0326634	-2.1362	0.386476	0.866025	0.0250128	0.926034	0.592297	0.280734
MPST	0.00221369	3.05996	0.908073	0.11547	0.00750655	0.513762	0.57821	0.523332
MRC1	0.0282404	2.19393	0.817361	-0.23094	0.0239654	0.597287	0.719866	0.184343
MRGPRE	0.00665673	-2.71355	0.326348	0.981495	0.00728491	0.311725	0.707146	0.818078
MRGPRF	0.0243434	2.25167	0.729034	-0.34641	0.0171229	0.944241	0.258961	0.404535
MROH2A	0.00389242	2.88675	0.418923	0.80829	0.00355338	0.802949	0.456439	0.281073
MRPL39	0.0130425	2.48261	1	0	0.0196798	0.899405	0.621489	0.271253
MRS2	0.0209213	-2.3094	0.488422	0.69282	0.0134764	0.91869	0.217166	0.846475
MS4A4A	0.0101931	2.56921	0.204024	-1.27017	0.00972286	0.435574	0.661861	0.465934
MSL3	0.0433081	2.02073	0.45292	0.750555	0.0283791	0.690395	0.420684	0.434003
MSX1	0.0153138	2.42487	0.272656	1.09697	0.0204741	0.207419	0.364982	0.972065
MT1DP	0.0179263	2.36714	0.95396	-0.057735	0.00997132	0.56371	0.651878	0.334065
MTMR6	0.0282404	2.19393	0.86249	0.173205	0.0307805	0.581676	0.608261	0.335258
MUS81	0.0376669	-2.07846	0.95396	-0.057735	0.0359884	0.933605	0.515631	0.272651
MXD1	0.0179263	-2.36714	0.133327	1.50111	0.0430344	0.900826	0.911251	0.75909
MYCNUT	0.0243434	-2.25167	0.644167	-0.46188	0.0151797	0.372641	0.244543	0.35191
MYH16	0.0243434	-2.25167	0.644167	-0.46188	0.0412766	0.970009	0.70949	0.442358
MYL12A	0.0433081	2.02073	0.603332	-0.519615	0.00661155	0.832882	0.325003	0.0825977
MYL7	0.0496472	1.96299	0.603332	0.519615	0.0482949	0.975182	0.286806	0.923092
MYO5C	0.0179263	2.36714	0.488422	0.69282	0.0064656	0.387155	0.35836	0.0957883
MYRF	0.0433081	2.02073	0.86249	0.173205	0.013339	0.740882	0.0851468	0.33069
NAP1L3	0.014138	-2.45374	0.563703	0.57735	0.00639432	0.962782	0.301461	0.411863
NARF	0.0153138	2.42487	1	0	0.044496	0.662027	0.80833	0.298935
NAT1	0.000219851	3.69504	0.488422	-0.69282	0.000225813	0.363167	0.655536	0.456623
NAV1	0.0282404	-2.19393	0.686106	0.404145	0.00451479	0.515545	0.459289	0.0895625
NAV2-IT1	0.0179263	-2.36714	0.729034	-0.34641	0.0130674	0.524279	0.991152	0.168513
NDFIP2-AS1	0.00182274	-3.11769	0.184209	1.32791	0.00136838	0.323618	0.569315	0.679988
NDST1	0.0433081	-2.02073	0.326348	-0.981495	0.0266461	0.942563	0.163343	0.628109
NDUFA2	0.0433081	2.02073	0.95396	0.057735	0.0202521	0.469246	0.578806	0.333598
NDUFS7	0.0153138	2.42487	0.418923	-0.80829	0.0120666	0.860352	0.239534	0.417753
NEFM	0.0496472	-1.96299	0.386476	0.866025	0.0301873	0.950749	0.680664	0.595322
NEURL4	0.00182274	-3.11769	0.817361	0.23094	0.000986196	0.931926	0.266397	0.44421
NFYC	0.0496472	-1.96299	0.225346	-1.21244	0.022866	0.838293	0.746031	0.218578
NICN1	0.0282404	2.19393	0.386476	-0.866025	0.020465	0.956593	0.672923	0.28592
NIPA2	0.0376669	2.07846	0.488422	-0.69282	0.0487846	0.957954	0.696564	0.821278
NLRC3	0.0433081	-2.02073	0.729034	0.34641	0.044007	0.964498	0.906072	0.354404
NLRP13	0.0496472	-1.96299	0.355611	-0.92376	0.0159766	0.940744	0.225206	0.211204
NME6	0.014138	-2.45374	0.525373	0.635085	0.0258095	0.729766	0.470695	0.390428
NOL3	0.0282404	-2.19393	0.488422	0.69282	0.0234872	0.714617	0.264317	0.909842
NOL7	0.0282404	2.19393	0.603332	0.519615	0.00522557	0.82099	0.889481	0.0803203
NOTUM	0.0433081	-2.02073	0.86249	0.173205	0.0253619	0.592927	0.263875	0.366065
NPY1R	0.0130425	-2.48261	0.86249	-0.173205	0.00984038	0.918279	0.216148	0.278672
NR1I3	0.0433081	-2.02073	0.77283	-0.288675	0.0401594	0.631876	0.682634	0.57441
NRL	0.0282404	-2.19393	0.95396	-0.057735	0.0163229	0.551779	0.686875	0.137911
NTRK3	0.0130425	2.48261	0.248213	1.1547	0.000830003	0.121939	0.0789547	0.808928
NUDT10	0.00937477	-2.59808	0.95396	0.057735	0.0102546	0.694508	0.888663	0.699346
NUP133	0.0496472	1.96299	0.148915	-1.44338	0.0330528	0.96311	0.748886	0.283753
NUPR1	0.0209213	2.3094	0.355611	0.92376	0.0218055	0.845238	0.699981	0.462503
NWD2	0.0376669	2.07846	0.326348	0.981495	0.0477087	0.638824	0.300459	0.735841
NXF2B	0.0179263	2.36714	0.165857	1.38564	0.0477053	0.529875	0.698347	0.711361
OPCML	0.0153138	2.42487	0.355611	0.92376	0.0458091	0.802283	0.878534	0.606687
OR10A2	0.0282404	2.19393	0.298698	-1.03923	0.0363692	0.574454	0.308589	0.851163
OR10A3	0.0110744	-2.54034	0.77283	-0.288675	0.0331298	0.475818	0.719597	0.743782
OR10K2	0.00937477	2.59808	0.386476	0.866025	0.0130573	0.782746	0.266722	0.514974
OR1N2	0.0376669	2.07846	0.77283	0.288675	0.0337788	0.878526	0.533887	0.831385
OR2C3	0.00665673	-2.71355	0.355611	0.92376	0.010018	0.343844	0.218875	0.300956
OR2G2	0.0153138	-2.42487	0.817361	-0.23094	0.0202197	0.376606	0.839296	0.705223
OR4A15	0.0376669	2.07846	0.58336	-0.548483	0.0236145	0.670377	0.513251	0.319291
OR4C16	0.00937477	2.59808	0.686106	0.404145	0.0200912	0.774521	0.420535	0.88985
OR4X1	0.0110744	2.54034	0.298698	-1.03923	0.00779811	0.197383	0.448061	0.979469
OR51Q1	0.0243434	2.25167	0.603332	-0.519615	0.0246656	0.49829	0.611155	0.413452
OR52E8	0.000428568	3.52184	0.686106	-0.404145	0.00118331	0.411288	0.52076	0.323658
OR52N4	0.0153138	2.42487	0.418923	-0.80829	0.00952244	0.664406	0.626649	0.283371
OR56A5	0.00937477	-2.59808	0.165857	-1.38564	0.0224608	0.97761	0.44547	0.808715
OR5H14	0.0376669	2.07846	0.86249	-0.173205	0.0331627	0.361848	0.204219	0.880065
OR5M3	0.0433081	2.02073	0.119033	1.55885	0.0231661	0.641762	0.284026	0.229911
OR5P2	0.0433081	-2.02073	0.729034	-0.34641	0.0297623	0.463735	0.353391	0.256934
OR6N1	0.000275504	3.63731	0.908073	-0.11547	2.04183e-05	0.364934	0.613598	0.472954
OR6S1	0.0209213	2.3094	0.248213	1.1547	0.0176736	0.725631	0.285037	0.630838
OR6V1	0.0433081	2.02073	0.603332	0.519615	0.0203608	0.621238	0.256083	0.481292
OR7G1	0.00937477	2.59808	0.248213	-1.1547	0.00248976	0.103015	0.791824	0.439344
ORC3	0.00466913	-2.82902	0.0832645	-1.73205	0.0150716	0.929917	0.532629	0.397585
OSER1	0.0153138	-2.42487	0.525373	0.635085	0.018761	0.850525	0.567025	0.90983
OSTN	0.0376669	2.07846	0.686106	0.404145	0.0437673	0.895886	0.426291	0.499069
OTOS	0.0326634	-2.1362	0.272656	-1.09697	0.0205125	0.592493	0.554159	0.177036
OXGR1	0.0262294	-2.2228	0.105969	-1.61658	0.0302828	0.360299	0.980875	0.343307
P2RX6	0.00182274	-3.11769	0.386476	0.866025	0.00530092	0.736453	0.825702	0.636376
PABPC5	0.0243434	-2.25167	0.86249	-0.173205	0.0122731	0.913127	0.360581	0.824376
PABPN1L	0.0130425	2.48261	0.45292	-0.750555	0.0215204	0.581994	0.65801	0.528906
PACSIN2	0.0282404	2.19393	0.77283	0.288675	0.02841	0.900461	0.413097	0.973837
PAF1	0.0209213	-2.3094	0.272656	1.09697	0.0178539	0.800493	0.440679	0.400298
PAGE3	0.0130425	-2.48261	0.298698	1.03923	0.028752	0.903198	0.45969	0.955398
PAQR9	0.0243434	-2.25167	0.45292	0.750555	0.0455983	0.631706	0.604852	0.788238
PARP10	0.0243434	2.25167	0.95396	-0.057735	0.0360197	0.712716	0.470941	0.570081
PART1	0.0433081	2.02073	0.119033	-1.55885	0.0291381	0.490522	0.102862	0.954858
PBX4	0.0110744	-2.54034	0.355611	0.92376	0.00265919	0.724024	0.0996244	0.457369
PCGEM1	0.0179263	2.36714	0.355611	0.92376	0.00441664	0.391195	0.126868	0.891324
PCOLCE	0.0209213	2.3094	0.355611	0.92376	0.046522	0.483326	0.321614	0.420134
PDHB	0.00791179	2.65581	0.272656	-1.09697	0.0248981	0.889703	0.264761	0.341177
PDPR	0.0376669	2.07846	0.355611	0.92376	0.0405676	0.909699	0.316526	0.32142
PDXDC2P	0.0110744	-2.54034	0.184209	-1.32791	0.0198437	0.681018	0.356739	0.727322
PDZRN3-AS1	0.00665673	2.71355	0.0940686	-1.67432	0.0420446	0.756783	0.62915	0.688528
PEAR1	0.0243434	2.25167	0.603332	-0.519615	0.0336125	0.773304	0.518361	0.482137
PEX5L	0.0282404	-2.19393	0.817361	0.23094	0.0145973	0.57443	0.130483	0.854527
PGF	0.00791179	-2.65581	0.298698	-1.03923	0.0151954	0.594244	0.511976	0.715836
PGK1	0.00182274	-3.11769	0.355611	-0.92376	0.00154681	0.670197	0.115277	0.599336
PHEX-AS1	0.0110744	-2.54034	0.817361	0.23094	0.0123806	0.362265	0.590934	0.355035
PI3	0.0282404	2.19393	0.165857	-1.38564	0.0146209	0.228053	0.38987	0.705447
PIGZ	0.0433081	2.02073	0.603332	-0.519615	0.00762346	0.889836	0.212352	0.0962541
PIN1	0.0110744	2.54034	0.105969	-1.61658	0.00762971	0.398613	0.81689	0.313337
PIN4P1	0.0130425	-2.48261	0.248213	1.1547	0.0106243	0.524504	0.391763	0.465757
PIP4K2C	0.00466913	-2.82902	0.644167	-0.46188	0.00833643	0.972543	0.381304	0.491977
PLEKHO1	0.0209213	2.3094	0.644167	-0.46188	0.0290421	0.789028	0.918741	0.176635
PLP2	0.0433081	2.02073	0.525373	0.635085	0.028227	0.342136	0.645907	0.45316
PLXNA1	0.0153138	-2.42487	0.686106	-0.404145	0.0222727	0.890916	0.911438	0.281621
PMAIP1	0.0326634	-2.1362	1	0	0.0310762	0.444149	0.454899	0.388915
POLA2	0.00937477	-2.59808	0.644167	0.46188	0.0149755	0.679441	0.893844	0.586203
POLR2E	0.0209213	-2.3094	0.686106	0.404145	0.0245183	0.964719	0.22858	0.864994
POM121L2	0.00466913	2.82902	0.133327	-1.50111	0.00638362	0.944302	0.840409	0.87899
POT1-AS1	0.0130425	2.48261	0.603332	-0.519615	0.0411891	0.533283	0.639526	0.58898
PPBP	0.0153138	2.42487	1	0	0.0302582	0.860275	0.648847	0.975922
PPM1B	0.0153138	-2.42487	0.119033	1.55885	0.0218935	0.940834	0.632732	0.495941
PPP1R13L	0.0326634	-2.1362	0.86249	0.173205	0.0234334	0.891475	0.592095	0.354231
PPP1R1A	0.0376669	2.07846	0.908073	-0.11547	0.0320262	0.26705	0.589194	0.411345
PRDM9	0.0110744	-2.54034	0.563703	0.57735	0.0393793	0.838969	0.850704	0.832505
PRICKLE2	0.00665673	2.71355	0.184209	1.32791	0.0079817	0.449719	0.821179	0.655595
PRKAA2	0.0326634	2.1362	0.908073	-0.11547	0.0133716	0.634612	0.127408	0.395039
PRKAR2A-AS1	0.0496472	-1.96299	0.386476	-0.866025	0.0254297	0.684669	0.337963	0.905128
PRKCA	0.0243434	2.25167	0.326348	0.981495	0.0088793	0.239427	0.927077	0.185481
PRKCE	0.0496472	-1.96299	0.817361	-0.23094	0.0326555	0.975893	0.310088	0.771279
PRMT5-AS1	0.0179263	-2.36714	0.644167	0.46188	0.0362477	0.407875	0.688284	0.965635
PROX1	0.0496472	1.96299	0.148915	-1.44338	0.0356414	0.399218	0.727271	0.407424
PRPF31	0.0243434	-2.25167	0.45292	0.750555	0.0277327	0.981648	0.50582	0.31514
PRR22	0.0209213	2.3094	0.0567468	-1.90526	0.0233051	0.770945	0.367189	0.244527
PRSS50	0.0153138	-2.42487	0.525373	0.635085	0.0253168	0.928912	0.975291	0.45736
PSD4	0.0130425	-2.48261	0.248213	-1.1547	0.00266184	0.389315	0.307117	0.257848
PSG8	0.00558362	-2.77128	0.148915	1.44338	0.0485952	0.800927	0.530446	0.686109
PSMC6	0.0153138	-2.42487	0.686106	0.404145	0.0422952	0.937166	0.603727	0.737334
PSMD4	0.0282404	-2.19393	0.204024	-1.27017	0.0214278	0.280858	0.389081	0.571113
PSPH	0.0209213	2.3094	0.165857	-1.38564	0.035135	0.660206	0.684532	0.718032
PTGS1	0.0262294	2.2228	0.488422	0.69282	0.0385853	0.83284	0.42821	0.732983
PTPRF	0.0209213	-2.3094	0.908073	-0.11547	0.0434966	0.806999	0.410721	0.42142
PTPRO	0.0130425	2.48261	0.77283	0.288675	0.00633745	0.582898	0.265408	0.166289
PTX4	0.0433081	-2.02073	0.817361	0.23094	0.0496792	0.858252	0.284931	0.404065
PURG	0.0110744	-2.54034	0.525373	-0.635085	0.0217992	0.477717	0.671296	0.437466
PWRN2	0.0282404	2.19393	0.525373	0.635085	0.0338561	0.739117	0.464098	0.450953
PXMP4	0.0209213	2.3094	0.165857	-1.38564	0.0163515	0.802222	0.186662	0.829779
QRSL1	0.00182274	-3.11769	0.603332	0.519615	0.00327959	0.73956	0.942837	0.773874
R3HDML	0.0326634	2.1362	0.355611	0.92376	0.0360781	0.864434	0.345546	0.963334
RAB14	0.00937477	-2.59808	0.95396	0.057735	0.00924964	0.692869	0.255506	0.897974
RAB23	0.00791179	2.65581	0.86249	-0.173205	0.0288392	0.799655	0.647319	0.969008
RAB25	0.0110744	-2.54034	0.133327	1.50111	0.0229851	0.989203	0.895409	0.890724
RAB40C	0.0243434	-2.25167	0.729034	0.34641	0.0287236	0.982059	0.176557	0.738742
RAB9BP1	0.0110744	-2.54034	0.86249	0.173205	0.0191181	0.809105	0.808808	0.424225
RALGPS2	0.0326634	-2.1362	0.214494	1.2413	0.0161056	0.569982	0.205551	0.163246
RANGAP1	0.0179263	-2.36714	0.355611	0.92376	0.0171862	0.597573	0.206145	0.462421
RASA3	0.0179263	2.36714	0.817361	-0.23094	0.00630348	0.584207	0.804401	0.15137
RASA4	0.0243434	2.25167	0.686106	-0.404145	0.0257534	0.533164	0.317398	0.792918
RASAL1	0.00389242	2.88675	0.686106	-0.404145	0.018556	0.491957	0.511943	0.715214
RASGRP2	0.00937477	2.59808	0.603332	-0.519615	0.00330872	0.892245	0.55456	0.0862747
RASL10A	0.00791179	-2.65581	0.563703	0.57735	0.0131646	0.916738	0.645287	0.520536
RASSF6	0.0130425	-2.48261	0.817361	-0.23094	0.0166353	0.830056	0.38137	0.563937
RBM3	0.0433081	-2.02073	0.86249	-0.173205	0.0149494	0.335537	0.317758	0.798719
RDH10	0.0326634	2.1362	0.95396	0.057735	0.034319	0.561967	0.881351	0.406286
RELB	0.00937477	2.59808	0.355611	-0.92376	0.027291	0.726821	0.98361	0.948958
RERGL	0.0433081	2.02073	0.644167	0.46188	0.0356186	0.703731	0.333009	0.516967
RETNLB	0.0179263	2.36714	0.0567468	-1.90526	0.0270735	0.398844	0.419979	0.898594
RHBDF2	0.0282404	2.19393	0.386476	0.866025	0.0499754	0.751247	0.417511	0.471352
RIMS4	0.0243434	2.25167	0.95396	-0.057735	0.0309849	0.450174	0.34361	0.831098
RIPPLY2	0.0496472	-1.96299	0.86249	-0.173205	0.0368761	0.898064	0.606805	0.20596
RLN1	0.0209213	-2.3094	0.204024	1.27017	0.0432149	0.860631	0.511722	0.440846
RMI2	0.0326634	2.1362	0.386476	-0.866025	0.0169438	0.368079	0.688421	0.233846
RMND5A	0.0243434	-2.25167	0.729034	-0.34641	0.0447598	0.616065	0.438385	0.782933
RNASEH1	0.0326634	-2.1362	0.525373	-0.635085	0.0244172	0.59985	0.634238	0.237846
RNF151	0.0376669	2.07846	0.0646717	-1.84752	0.0492525	0.664823	0.630419	0.425806
RNF41	0.00466913	-2.82902	0.603332	0.519615	0.00223597	0.47269	0.179167	0.721245
ROCK2	0.0433081	2.02073	0.95396	-0.057735	0.0456638	0.986236	0.861951	0.306581
ROM1	0.0376669	-2.07846	0.204024	-1.27017	0.037145	0.855628	0.891427	0.366944
RP2	0.00937477	-2.59808	0.86249	-0.173205	0.0235422	0.906702	0.71341	0.486188
RPL19	0.00791179	2.65581	0.95396	0.057735	0.00622305	0.4121	0.509847	0.399036
RPL23AP60	0.0282404	2.19393	0.298698	-1.03923	0.0400651	0.866426	0.672038	0.718074
RPL29P2	0.0130425	2.48261	0.95396	0.057735	0.0370114	0.711228	0.636303	0.986461
RPL32P3	0.0496472	1.96299	0.603332	-0.519615	0.0260082	0.642637	0.446296	0.247774
RPRML	0.00466913	-2.82902	0.45292	0.750555	0.0042936	0.691231	0.798605	0.439777
RPS8	0.0130425	2.48261	0.817361	0.23094	0.0149871	0.757981	0.657931	0.243543
RRAD	0.0376669	-2.07846	0.563703	-0.57735	0.0268373	0.80888	0.161014	0.933223
RRAS	0.00149616	3.17543	0.386476	0.866025	0.00269057	0.446008	0.174507	0.537531
RRP7BP	0.0433081	-2.02073	0.0567468	1.90526	0.0296331	0.438993	0.19366	0.885772
RSPH4A	0.00268017	-3.00222	0.729034	0.34641	0.00705085	0.996925	0.987371	0.746008
RTBDN	0.00791179	2.65581	0.603332	0.519615	0.0252932	0.695245	0.660372	0.863507
RTCA-AS1	0.0496472	-1.96299	0.603332	0.519615	0.0145426	0.161396	0.176627	0.518489
RTN4R	0.000174887	3.75278	0.204024	-1.27017	0.00026102	0.72747	0.606992	0.777879
RTP5	0.0282404	-2.19393	0.488422	0.69282	0.011211	0.50641	0.121732	0.287486
RUFY3	0.0282404	2.19393	0.86249	0.173205	0.0359208	0.852806	0.917641	0.248099
RUVBL2	0.0326634	-2.1362	0.184209	1.32791	0.0441545	0.552973	0.383514	0.959234
RWDD1	0.0326634	-2.1362	1	0	0.0422697	0.658824	0.369356	0.916589
RYR2	0.00389242	2.88675	0.386476	-0.866025	0.00246366	0.860678	0.339094	0.479302
S100A8	0.0130425	2.48261	0.165857	1.38564	0.034288	0.951869	0.644111	0.545935
S1PR4	0.00149616	3.17543	0.817361	-0.23094	0.00172971	0.260362	0.433155	0.313273
SAMD14	0.00558362	-2.77128	0.0940686	-1.67432	0.031175	0.972568	0.707841	0.565966
SAR1B	0.0130425	-2.48261	0.86249	0.173205	0.0468119	0.86389	0.515218	0.591164
SARDH	0.00466913	2.82902	0.488422	-0.69282	0.00658392	0.785081	0.338365	0.416199
SASH3	0.0282404	2.19393	0.326348	0.981495	0.0213866	0.859124	0.986171	0.300484
SAXO1	0.0326634	-2.1362	0.165857	1.38564	0.0275204	0.920299	0.361154	0.755197
SCN1B	0.0282404	2.19393	0.729034	-0.34641	0.024011	0.234513	0.865892	0.502021
SCUBE1	0.0326634	-2.1362	0.77283	0.288675	0.0201705	0.499742	0.577398	0.325241
SCYL1	0.0179263	-2.36714	0.77283	-0.288675	0.00783074	0.434364	0.257807	0.564744
SEC61G	0.0404041	2.04959	0.418923	-0.80829	0.0472322	0.718125	0.480922	0.733427
SERPINB8	0.0496472	-1.96299	0.105969	1.61658	0.0128068	0.222313	0.265523	0.398151
SET	0.0326634	-2.1362	0.644167	0.46188	0.0368418	0.431153	0.603451	0.875988
SFT2D3	0.0282404	-2.19393	0.386476	0.866025	0.0259675	0.655058	0.166727	0.630355
SHARPIN	0.0110744	-2.54034	0.488422	0.69282	0.0215832	0.651405	0.658242	0.855311
SHC1	0.0110744	-2.54034	1	0	0.0414856	0.893596	0.282159	0.976304
SHISA2	0.0496472	1.96299	0.119033	-1.55885	0.0484537	0.558228	0.302686	0.622885
SHROOM2	0.0376669	2.07846	0.355611	-0.92376	0.030324	0.830675	0.892794	0.297141
SHROOM3	0.0282404	-2.19393	0.0940686	-1.67432	0.0351106	0.860004	0.300399	0.884492
SIDT2	0.00937477	-2.59808	0.86249	0.173205	0.014385	0.490297	0.472956	0.377498
SIMC1	0.0130425	2.48261	0.525373	-0.635085	0.0188843	0.373797	0.180217	0.867524
SIRPB2	0.0376669	-2.07846	0.86249	-0.173205	0.00202953	0.391615	0.0862882	0.120526
SIRT6	0.0110744	-2.54034	0.488422	-0.69282	0.0172864	0.640442	0.59637	0.465963
SKA1	0.0130425	2.48261	0.644167	-0.46188	0.00493833	0.654569	0.448603	0.183145
SLC16A12-AS1	0.0282404	-2.19393	0.225346	-1.21244	0.037422	0.51092	0.671285	0.820583
SLC18A1	0.00558362	2.77128	0.817361	0.23094	0.0174538	0.96077	0.656057	0.950023
SLC25A14	0.0326634	-2.1362	0.184209	-1.32791	0.0395704	0.714108	0.482721	0.984509
SLC25A39	0.0282404	2.19393	0.298698	-1.03923	0.0318466	0.751768	0.386699	0.39721
SLC2A11	0.0282404	-2.19393	0.418923	0.80829	0.0429853	0.781341	0.938355	0.520221
SLC34A3	0.0282404	2.19393	0.298698	1.03923	0.0276011	0.505436	0.437988	0.438082
SLC35A5	0.0153138	-2.42487	0.77283	-0.288675	0.0175365	0.787634	0.230819	0.933941
SLC35C1	0.0130425	2.48261	0.386476	-0.866025	0.0419817	0.819147	0.70178	0.525344
SLC35G2	0.00791179	2.65581	0.105969	-1.61658	0.0178648	0.921329	0.593408	0.485491
SLC44A5	0.0326634	2.1362	0.77283	-0.288675	0.0464747	0.663302	0.950216	0.39682
SLC51A	0.00149616	3.17543	0.326348	-0.981495	0.000288866	0.649383	0.484652	0.0999591
SLC5A10	0.0282404	2.19393	0.686106	-0.404145	0.0348627	0.842672	0.454766	0.705046
SLC7A6	0.0179263	-2.36714	0.165857	-1.38564	0.0287484	0.74238	0.507017	0.92829
SLC8A1	0.0179263	-2.36714	0.77283	-0.288675	0.0440258	0.724441	0.667513	0.619676
SLCO3A1	0.0433081	2.02073	0.272656	1.09697	0.0131093	0.589237	0.501772	0.267541
SLCO5A1	0.00937477	-2.59808	0.525373	-0.635085	0.0213001	0.909873	0.868081	0.935986
SMAD5-AS1	0.0282404	2.19393	0.908073	-0.11547	0.0176287	0.576926	0.314028	0.982578
SMIM12	0.0110744	-2.54034	0.77283	0.288675	0.00121199	0.0967842	0.553577	0.159654
SMPD1	0.0179263	2.36714	0.488422	-0.69282	0.0134129	0.54218	0.643624	0.160768
SMPD5	0.0243434	-2.25167	0.603332	0.519615	0.0220617	0.75964	0.35943	0.307032
SMPX	0.0130425	-2.48261	0.908073	-0.11547	0.0134002	0.387977	0.443497	0.659413
SNORA47	0.00937477	2.59808	0.386476	-0.866025	0.0153496	0.790741	0.4033	0.479582
SNORA54	0.0110744	2.54034	0.488422	-0.69282	0.0371235	0.556227	0.624541	0.498876
SNORA64	0.0326634	2.1362	0.686106	-0.404145	0.025396	0.596806	0.941954	0.554578
SNORA70C	0.000900936	-3.31976	0.729034	0.34641	0.00277926	0.903986	0.625191	0.839624
SNORD114-24	0.0496472	-1.96299	0.644167	-0.46188	0.04749	0.364252	0.907901	0.557956
SNORD114-6	0.00389242	2.88675	0.298698	-1.03923	0.00244175	0.580257	0.86372	0.488437
SNORD115-28	0.00389242	-2.88675	0.418923	0.80829	0.00960279	0.769075	0.668557	0.768945
SNORD115-45	0.0179263	-2.36714	0.729034	0.34641	0.0462496	0.726505	0.751945	0.492485
SNORD115-8	0.00466913	-2.82902	0.184209	1.32791	0.0283037	0.962887	0.977655	0.953445
SNORD116-14	0.00558362	2.77128	0.95396	0.057735	0.00695855	0.638872	0.673213	0.39005
SNORD116-19	0.00791179	2.65581	0.86249	-0.173205	0.0158105	0.797216	0.473902	0.933306
SNORD116-2	0.0130425	2.48261	0.908073	-0.11547	0.0151236	0.473077	0.659925	0.359197
SNORD116-5	0.0130425	2.48261	0.95396	0.057735	0.010381	0.584865	0.720073	0.294524
SNORD116-6	0.00791179	2.65581	0.795012	-0.259808	0.0165552	0.498846	0.701191	0.344086
SNORD11B	0.00323491	2.94449	0.563703	-0.57735	0.0333043	0.654968	0.522603	0.734201
SNORD3D	0.00791179	2.65581	0.729034	-0.34641	0.00793843	0.714194	0.261843	0.758014
SNORD82	0.0153138	-2.42487	0.95396	0.057735	0.0451273	0.708807	0.489451	0.856652
SNORD99	0.0350891	-2.10733	0.204024	1.27017	0.0128596	0.75421	0.212249	0.456887
SNTB1	0.0209213	-2.3094	0.817361	-0.23094	0.0366596	0.879708	0.512834	0.328222
SNTN	0.0179263	-2.36714	0.563703	0.57735	0.00947319	0.552326	0.588658	0.225228
SNURFL	0.0496472	1.96299	0.644167	0.46188	0.0414187	0.614656	0.254909	0.322634
SOCS2-AS1	0.0153138	-2.42487	0.817361	0.23094	0.0327167	0.866323	0.569288	0.667327
SOGA1	0.0404041	-2.04959	0.86249	0.173205	0.0358927	0.533476	0.450027	0.583838
SOWAHA	0.0433081	-2.02073	0.45292	0.750555	0.0462984	0.764896	0.374621	0.478414
SOX13	0.00558362	-2.77128	0.386476	0.866025	0.00544456	0.687188	0.362645	0.39924
SOX18	0.0153138	2.42487	0.418923	0.80829	0.0275009	0.808259	0.402502	0.308381
SOX3	0.0130425	-2.48261	0.418923	-0.80829	0.0460807	0.983964	0.967711	0.364466
SP8	0.0209213	-2.3094	0.0940686	1.67432	0.0369848	0.5265	0.580903	0.606264
SPAST	0.00466913	-2.82902	0.204024	1.27017	0.0220383	0.523736	0.725532	0.601848
SPATA3-AS1	0.0110744	-2.54034	0.355611	0.92376	0.0201888	0.91335	0.344499	0.925391
SPDL1	0.00791179	-2.65581	0.355611	-0.92376	0.0111391	0.235993	0.422868	0.5019
SPDYC	0.0303828	-2.16506	0.272656	1.09697	0.0176335	0.869649	0.194964	0.716783
SPINK1	0.00791179	2.65581	0.248213	-1.1547	0.0214107	0.899806	0.139195	0.471523
SRP9	0.0376669	2.07846	0.686106	0.404145	0.0482914	0.927766	0.70014	0.362838
SSB	0.0326634	2.1362	0.729034	-0.34641	0.0290263	0.968875	0.879281	0.211275
SSBP1	0.0130425	2.48261	0.326348	0.981495	0.0204674	0.776666	0.488574	0.509812
SSTR5-AS1	0.0282404	-2.19393	0.644167	0.46188	0.0437099	0.476495	0.914235	0.531181
ST3GAL4	0.0110744	-2.54034	0.908073	-0.11547	0.0146491	0.670449	0.237336	0.964051
STAT6	0.0282404	-2.19393	0.817361	0.23094	0.0153675	0.904304	0.287018	0.253304
STIM1	0.0433081	2.02073	0.83986	-0.202073	0.0499358	0.767491	0.713524	0.855532
STK11IP	0.0326634	-2.1362	0.45292	-0.750555	0.0148064	0.600511	0.696475	0.122336
STX1B	0.00558362	-2.77128	0.119033	1.55885	0.00366956	0.920126	0.290009	0.859397
STX2	0.0326634	2.1362	0.355611	0.92376	0.0457696	0.680355	0.306758	0.423781
TAF6	0.0110744	-2.54034	0.603332	0.519615	0.0121139	0.778686	0.290345	0.961912
TAS2R3	0.0243434	-2.25167	0.133327	1.50111	0.0132318	0.378717	0.626396	0.387303
TBC1D10B	0.0130425	2.48261	0.488422	-0.69282	0.0112358	0.793349	0.235426	0.854849
TBC1D10C	0.0496472	-1.96299	0.686106	0.404145	0.0353671	0.772459	0.660168	0.326055
TBC1D19	0.00323491	2.94449	0.525373	-0.635085	0.00462393	0.952384	0.683253	0.556951
TBL2	0.0376669	-2.07846	0.817361	-0.23094	0.00878631	0.69506	0.080303	0.823128
TBX19	0.00389242	-2.88675	0.686106	0.404145	0.00650122	0.694437	0.633574	0.754572
TBX2	0.00791179	-2.65581	0.248213	-1.1547	0.0069721	0.381382	0.437438	0.875747
TBXA2R	0.0179263	2.36714	0.298698	-1.03923	0.0138689	0.825895	0.246864	0.411044
TCL1B	0.0179263	-2.36714	0.603332	-0.519615	0.0132274	0.51664	0.755624	0.129327
TCP10	0.0376669	2.07846	0.603332	0.519615	0.0226504	0.506898	0.325256	0.385076
TDP1	0.0153138	-2.42487	0.45292	0.750555	0.0152601	0.71394	0.203706	0.84094
TDRD10	0.0209213	2.3094	0.0567468	-1.90526	0.0320176	0.806048	0.628189	0.83627
TEX101	0.0433081	-2.02073	0.644167	0.46188	0.0136271	0.120281	0.678062	0.4898
TEX33	0.0433081	-2.02073	0.248213	1.1547	0.0482033	0.456497	0.897328	0.893238
TFAP2A-AS1	0.0179263	2.36714	0.686106	-0.404145	0.0130192	0.511807	0.115027	0.468889
TFAP2C	0.0209213	-2.3094	0.729034	-0.34641	0.0212123	0.60401	0.300456	0.560095
TFB1M	0.0496472	-1.96299	0.298698	1.03923	0.0213298	0.612691	0.346578	0.389197
TFCP2	0.0153138	-2.42487	0.225346	-1.21244	0.0376901	0.575793	0.564257	0.44198
TFR2	0.000174887	3.75278	0.729034	0.34641	7.74393e-05	0.529206	0.837423	0.341673
TGFBR3L	0.0110744	2.54034	0.386476	0.866025	0.0145897	0.931879	0.419533	0.257025
THEG5	0.0130425	2.48261	0.86249	-0.173205	0.0264123	0.977759	0.225995	0.283357
TLR2	0.00466913	2.82902	0.525373	0.635085	0.00462873	0.594499	0.80962	0.50229
TLR7	0.0326634	2.1362	0.272656	-1.09697	0.0436386	0.590741	0.822708	0.600075
TLR8	0.0433081	-2.02073	0.77283	-0.288675	0.0432529	0.201863	0.371079	0.94076
TM4SF1	0.0376669	2.07846	0.95396	0.057735	0.049958	0.676754	0.748735	0.428938
TM4SF4	0.00221369	-3.05996	0.908073	0.11547	0.00184545	0.354451	0.370821	0.435617
TMEM106A	0.0282404	-2.19393	0.77283	0.288675	0.0358537	0.844833	0.135405	0.556264
TMEM108-AS1	0.0153138	2.42487	0.86249	0.173205	0.00693593	0.583802	0.123447	0.888978
TMEM119	0.00466913	2.82902	0.563703	0.57735	0.00909439	0.357139	0.540317	0.674402
TMEM133	0.00937477	2.59808	0.225346	-1.21244	0.011711	0.845101	0.255332	0.368185
TMEM150B	0.0130425	-2.48261	0.603332	0.519615	0.0241794	0.812581	0.691608	0.428674
TMEM158	0.0496472	1.96299	0.908073	-0.11547	0.0466232	0.466919	0.522934	0.553966
TMEM161A	0.00323491	-2.94449	0.603332	-0.519615	0.00303679	0.700213	0.436454	0.608732
TMEM184A	0.00323491	-2.94449	0.355611	-0.92376	0.000375489	0.595559	0.0622084	0.815357
TMEM246	0.00221369	-3.05996	0.0940686	-1.67432	0.000962388	0.19322	0.19814	0.711172
TMEM254	0.0326634	-2.1362	0.225346	-1.21244	0.0333292	0.987802	0.278599	0.417101
TMEM259	0.0179263	-2.36714	0.525373	0.635085	0.0130034	0.678283	0.11618	0.982666
TMEM41A	0.0179263	-2.36714	0.0646717	-1.84752	0.0338289	0.451627	0.264724	0.914956
TMEM41B	0.00558362	-2.77128	0.707454	-0.375278	0.00778476	0.919197	0.699327	0.325738
TMEM9	0.0110744	2.54034	0.148915	-1.44338	0.0461229	0.686803	0.587224	0.848029
TMPRSS9	0.000532006	-3.4641	0.418923	0.80829	0.0011403	0.782659	0.450553	0.62692
TNNI2	0.0326634	-2.1362	0.95396	-0.057735	0.0218922	0.474406	0.146023	0.453972
TOMM40	0.0433081	-2.02073	0.686106	0.404145	0.0295083	0.996069	0.25674	0.76486
TOR3A	0.0243434	2.25167	0.0646717	-1.84752	0.00823644	0.606073	0.0898598	0.563504
TPM3	0.0376669	2.07846	0.418923	0.80829	0.0463928	0.586256	0.622606	0.451027
TRAF3IP1	0.0153138	-2.42487	0.204024	-1.27017	0.0199661	0.775789	0.759551	0.509084
TRAIP	0.0179263	2.36714	0.729034	-0.34641	0.0369668	0.834607	0.782801	0.432844
TRAJ16	0.00558362	-2.77128	0.45292	-0.750555	0.0287163	0.912982	0.909554	0.641307
TRAJ43	0.0179263	-2.36714	0.729034	-0.34641	0.0414865	0.876152	0.621453	0.745782
TRAJ6	0.0326634	-2.1362	0.133327	1.50111	0.0421756	0.52838	0.421765	0.873707
TRAM2	0.0376669	-2.07846	0.77283	-0.288675	0.0320544	0.75812	0.132669	0.796741
TRAV40	0.0282404	-2.19393	0.95396	0.057735	0.0476199	0.733067	0.580546	0.4082
TRBV6-6	0.0130425	2.48261	0.0940686	-1.67432	0.0272569	0.540228	0.429308	0.374374
TRBV6-8	0.00937477	2.59808	0.488422	-0.69282	0.0306885	0.218477	0.42821	0.6359
TRDJ4	0.00149616	-3.17543	0.298698	1.03923	0.015884	0.874818	0.865018	0.677095
TRHDE-AS1	0.0496472	-1.96299	0.225346	1.21244	0.0454577	0.446812	0.817748	0.447066
TRIAP1	0.0179263	-2.36714	0.0832645	1.73205	0.0243513	0.962676	0.72264	0.288665
TRIM26	0.0130425	-2.48261	0.298698	1.03923	0.0276531	0.802282	0.476849	0.482202
TRPV2	0.00937477	2.59808	0.418923	-0.80829	0.0196568	0.998872	0.881667	0.99043
TSC22D1	0.0209213	-2.3094	0.488422	-0.69282	0.0238834	0.62574	0.407165	0.38726
TSPY10	0.0496472	-1.96299	0.563703	-0.57735	0.00947533	0.0554571	0.95415	0.237683
TSPY3	0.0376669	-2.07846	0.77283	-0.288675	0.0271306	0.212066	0.953624	0.377648
TSSK1B	0.0282404	-2.19393	0.603332	0.519615	0.0276172	0.995912	0.2754	0.689447
TST	0.00665673	2.71355	0.355611	0.92376	0.00374704	0.538435	0.47462	0.283914
TSTD3	0.00665673	-2.71355	0.248213	1.1547	0.0132015	0.739256	0.524706	0.935317
TTC34	0.0130425	2.48261	0.95396	0.057735	0.0164754	0.683974	0.524371	0.6895
TTTY18	0.0153138	2.42487	0.488422	0.69282	0.0118557	0.368235	0.454861	0.760998
TXNDC12-AS1	0.0130425	-2.48261	0.225346	1.21244	0.0249826	0.855401	0.453477	0.97943
ULBP2	0.0282404	2.19393	0.86249	-0.173205	0.0372532	0.528277	0.473323	0.648767
UNC93A	0.00558362	-2.77128	0.644167	-0.46188	0.0102072	0.51159	0.30639	0.641246
UNK	0.00323491	-2.94449	0.86249	-0.173205	0.00283493	0.316895	0.600983	0.822217
USF1	0.00791179	-2.65581	0.248213	1.1547	0.00608699	0.14712	0.990814	0.621192
VIPR1	0.0130425	2.48261	0.686106	0.404145	0.0471439	0.53084	0.538064	0.773897
VPS51	0.00323491	-2.94449	0.119033	-1.55885	0.00616739	0.187831	0.288398	0.809032
VWA9	0.00558362	-2.77128	0.729034	0.34641	0.00377812	0.662408	0.413361	0.152432
VWCE	0.0282404	-2.19393	0.488422	-0.69282	0.0223189	0.742827	0.680398	0.18738
WASH1	0.0110744	-2.54034	1	0	0.0257378	0.782716	0.217082	0.556779
WASH2P	0.00791179	-2.65581	0.386476	0.866025	0.0211056	0.988332	0.246503	0.729545
WASH7P	0.0110744	-2.54034	1	0	0.0333299	0.760569	0.245411	0.56921
WBSCR17	0.0496472	1.96299	0.470486	-0.721688	0.0477455	0.563059	0.522941	0.392747
WDR4	0.0243434	-2.25167	0.95396	-0.057735	0.0240213	0.498742	0.283898	0.322638
WDR46	0.00937477	-2.59808	0.95396	0.057735	0.00593872	0.203287	0.573574	0.502642
WDR53	0.0433081	-2.02073	0.45292	0.750555	0.0491744	0.893331	0.363359	0.750582
WHAMMP1	0.00937477	2.59808	0.184209	1.32791	0.0134023	0.657351	0.899932	0.89984
WNT1	0.0433081	-2.02073	0.86249	-0.173205	0.0347705	0.704051	0.425371	0.425844
WT1-AS	0.00791179	-2.65581	0.488422	-0.69282	0.00312642	0.61422	0.368969	0.617031
XDH	0.0130425	2.48261	0.908073	0.11547	0.0135776	0.849882	0.470227	0.319187
XKR7	0.0243434	-2.25167	0.86249	0.173205	0.0495422	0.463291	0.912817	0.822357
XRCC6P5	0.00466913	2.82902	1	0	0.0054678	0.989198	0.743236	0.104857
YIPF4	0.0243434	-2.25167	0.729034	0.34641	0.0138153	0.887619	0.890226	0.156171
ZBTB24	0.0433081	-2.02073	0.525373	-0.635085	0.042052	0.938016	0.375313	0.52368
ZBTB42	0.0350891	2.10733	0.0646717	-1.84752	0.0240709	0.94841	0.20512	0.48841
ZC3H7B	0.0282404	-2.19393	0.326348	-0.981495	0.0206427	0.939674	0.388476	0.402504
ZCWPW2	0.0153138	2.42487	0.86249	-0.173205	0.0236354	0.309586	0.395616	0.794356
ZDHHC8P1	0.0376669	2.07846	0.386476	0.866025	0.0394015	0.931693	0.727654	0.336375
ZFP37	0.0496472	-1.96299	0.45292	-0.750555	0.0418896	0.777374	0.156538	0.634614
ZFP69B	0.0433081	-2.02073	0.272656	1.09697	0.0450631	0.898674	0.648585	0.458496
ZFYVE26	0.0110744	-2.54034	0.817361	0.23094	0.00292436	0.210578	0.557486	0.20177
ZGLP1	0.0179263	2.36714	0.603332	-0.519615	0.0412669	0.962878	0.507166	0.499009
ZNF25	0.00791179	2.65581	0.86249	0.173205	0.0252205	0.717062	0.574956	0.5027
ZNF257	0.00791179	-2.65581	1	0	0.0192139	0.837426	0.608679	0.329738
ZNF268	0.00937477	-2.59808	0.686106	0.404145	0.00960799	0.478528	0.447478	0.156498
ZNF280B	0.0179263	2.36714	0.644167	-0.46188	0.0129161	0.538052	0.328639	0.580989
ZNF287	0.0496472	1.96299	0.77283	-0.288675	0.0384227	0.370012	0.565876	0.583206
ZNF350	0.0433081	2.02073	0.908073	0.11547	0.0461642	0.905666	0.268463	0.675452
ZNF384	0.0326634	-2.1362	0.105969	1.61658	0.0429801	0.672994	0.705851	0.318118
ZNF418	0.00389242	-2.88675	0.355611	-0.92376	0.00683299	0.706171	0.825143	0.904163
ZNF502	0.0110744	-2.54034	0.77283	0.288675	0.0119719	0.877602	0.58408	0.322894
ZNF552	0.0326634	-2.1362	0.563703	0.57735	0.00970751	0.970659	0.180175	0.310282
ZNF560	0.0376669	2.07846	0.563703	-0.57735	0.0201789	0.838433	0.191333	0.786472
ZNF641	0.0179263	-2.36714	0.95396	0.057735	0.0160358	0.413016	0.889921	0.542714
ZNF692	0.0326634	-2.1362	0.603332	-0.519615	0.0295733	0.533772	0.900925	0.178953
ZNF705B	0.00665673	-2.71355	0.817361	0.23094	0.0336281	0.64645	0.805486	0.828665
ZNF720	0.0110744	2.54034	0.184209	-1.32791	0.0122708	0.564063	0.68696	0.476383
ZNF746	0.0326634	-2.1362	0.386476	0.866025	0.041121	0.667511	0.68253	0.23465
ZNF750	0.0463866	-1.99186	0.95396	-0.057735	0.0316296	0.905667	0.46702	0.492899
ZNF814	0.00937477	-2.59808	0.603332	0.519615	0.0200375	0.810693	0.612548	0.599205
ZNF821	0.0326634	-2.1362	0.326348	-0.981495	0.0289482	0.566406	0.466168	0.409767
ZNF844	0.0153138	2.42487	0.133327	-1.50111	0.0194946	0.894718	0.628418	0.9048
ZNFX1	0.00791179	2.65581	0.729034	-0.34641	0.0177965	0.528476	0.264343	0.353607
ZSCAN18	0.0179263	-2.36714	0.77283	0.288675	0.0130275	0.951731	0.562885	0.190096
ZSWIM3	0.0282404	-2.19393	0.908073	-0.11547	0.0474417	0.428076	0.338405	0.800584
BHMG1	0.00937477	-2.59808	0.0179263	2.36714	0.0151127	0.501607	0.878955	0.459386
C11orf1	0.0243434	2.25167	0.0496472	-1.96299	0.00985154	0.310368	0.648293	0.376606
CKAP2	0.00558362	2.77128	0.0282404	-2.19393	0.00886206	0.605249	0.37882	0.244783
CTB-99A3.1	0.00558362	-2.77128	0.0243434	2.25167	0.00936081	0.174858	0.288541	0.65628
FCN3	0.0130425	2.48261	0.0243434	-2.25167	0.0256424	0.866105	0.251536	0.686627
HRH1	0.00182274	-3.11769	0.0243434	2.25167	0.00210166	0.769284	0.787349	0.488465
HS6ST2-AS1	0.00182274	-3.11769	0.0326634	2.1362	0.00318553	0.652746	0.873685	0.867803
IFITM5	0.00558362	2.77128	0.0282404	-2.19393	0.0273924	0.613848	0.879369	0.571162
IL18RAP	0.0153138	2.42487	0.0326634	-2.1362	0.00687169	0.50841	0.253302	0.399221
KIF11	0.00323491	-2.94449	0.0179263	2.36714	0.00536115	0.75453	0.605688	0.790059
LINC00189	0.0282404	2.19393	0.0282404	-2.19393	0.0424594	0.52863	0.533386	0.363709
LINC00334	0.00182274	3.11769	0.0496472	-1.96299	0.00195465	0.630453	0.235555	0.154399
LINC00851	0.0433081	-2.02073	0.0376669	2.07846	0.0329455	0.592366	0.441835	0.14671
LNX1	0.0110744	-2.54034	0.00466913	2.82902	0.0153747	0.805306	0.385741	0.256313
LOC100130587	0.0179263	-2.36714	0.0282404	2.19393	0.0255134	0.462173	0.643216	0.36084
LOC101928635	0.0130425	2.48261	0.0433081	-2.02073	0.0134729	0.342116	0.202857	0.743169
LOC105369514	0.0496472	-1.96299	0.0433081	2.02073	0.031718	0.737356	0.60387	0.509066
LOC105370614	0.0153138	2.42487	0.0153138	-2.42487	0.0264976	0.726412	0.452675	0.960354
LOC105371414	0.0110744	-2.54034	0.0193733	2.33827	0.0230366	0.419126	0.994354	0.493508
LOC105371823	0.0153138	-2.42487	0.00665673	2.71355	0.0260676	0.835754	0.77607	0.741204
LOC105374361	0.0179263	-2.36714	0.0433081	2.02073	0.01654	0.685358	0.364108	0.67202
LOC105374689	0.0282404	-2.19393	0.0130425	2.48261	0.0400137	0.555645	0.889215	0.585079
LOC105376130	0.0433081	2.02073	0.0243434	-2.25167	0.0275226	0.39447	0.282056	0.886479
LOC105376658	0.0130425	2.48261	0.0326634	-2.1362	0.0101986	0.22911	0.298519	0.439078
MIR122	0.00558362	2.77128	0.00466913	-2.82902	0.00688152	0.53715	0.666133	0.244124
MRPL10	0.00937477	2.59808	0.0496472	-1.96299	0.016643	0.616427	0.469402	0.79312
OR10AG1	0.0496472	-1.96299	0.0282404	2.19393	0.0315122	0.351314	0.958306	0.285968
OR51B6	0.0209213	2.3094	0.0179263	-2.36714	0.0294815	0.90989	0.428748	0.332761
PIN1P1	0.00791179	-2.65581	0.00389242	2.88675	0.00854265	0.40286	0.985485	0.186213
PLD6	0.0209213	-2.3094	0.0326634	2.1362	0.0114878	0.943649	0.116285	0.923484
RNU6-59P	0.0326634	2.1362	0.0153138	-2.42487	0.0453324	0.824127	0.944051	0.547799
SPACA3	0.0326634	-2.1362	0.0209213	2.3094	0.026084	0.914225	0.762118	0.314668
TARM1	0.0433081	-2.02073	0.00558362	2.77128	0.0249188	0.695405	0.615069	0.147626
TGFA	0.00268017	3.00222	0.000812117	-3.34863	0.00255386	0.745429	0.656207	0.682409
TNIK	0.0153138	2.42487	0.00268017	-3.00222	0.0192701	0.353869	0.705485	0.973543
TNXB	0.0110744	2.54034	0.0326634	-2.1362	0.0342253	0.413784	0.833523	0.351034
TUBA3E	0.00268017	3.00222	0.0282404	-2.19393	0.0143038	0.450351	0.997444	0.619342
UBE2W	0.0153138	2.42487	0.0282404	-2.19393	0.0244276	0.824338	0.932246	0.360998
ZNF891	0.0326634	-2.1362	0.0243434	2.25167	0.0233058	0.894195	0.430763	0.170869
