# Supplementary material for: Prenatal particulate matter exposure imprints an epigenetic scar on FCER1G in fetal macrophages, reemerging in M2 macrophages to drive atopic dermatitis development
Source: Research Square preprint supplement (doi:10.21203/rs.3.rs-6318574/v1), 2025-05-07
Supplement: Supplementary file 5 [file 71836e93e4b6d62522492afc.xlsx]

## Sheet: Table 6
Supplementary Table 6. The list of conserved genes across the Hofbauer cell, fetal skin macrophages, and AD M2 macrophages.
	Placenta_early_p_val	Placenta_early_avg_log2FC	Placenta_early_pct.1	Placenta_early_pct.2	Placenta_early_p_val_adj	Placenta_term_p_val	Placenta_term_avg_log2FC	Placenta_term_pct.1	Placenta_term_pct.2	Placenta_term_p_val_adj	Fetal_skin_p_val	Fetal_skin_avg_log2FC	Fetal_skin_pct.1	Fetal_skin_pct.2	Fetal_skin_p_val_adj	Eczema_p_val	Eczema_avg_log2FC	Eczema_pct.1	Eczema_pct.2	Eczema_p_val_adj	Healthy_p_val	Healthy_avg_log2FC	Healthy_pct.1	Healthy_pct.2	Healthy_p_val_adj	max_pval	minimum_p_val
LYVE1-ENSG00000133800	0	7.48914	0.995	0.075	0	0	4.01364	0.928	0.172	0	0	8.25686	0.901	0.024	0	4.10803e-146	4.24051	0.188	0.011	6.93394e-142	1.9849e-74	2.46129	0.147	0.03	3.35032e-70	1.9849e-74	0
F13A1-ENSG00000124491	0	7.7434	0.976	0.07	0	0	3.80072	0.975	0.327	0	0	3.88058	0.889	0.323	0	0	6.61863	0.704	0.032	0	0	4.4619	0.328	0.034	0	0	0
FOLR2-ENSG00000165457	0	7.32221	0.998	0.104	0	0	3.51007	0.903	0.19	0	0	8.39638	0.897	0.02	0	0	8.63329	0.553	0.003	0	0	5.36356	0.356	0.016	0	0	0
C1QC-ENSG00000159189	0	5.06788	0.997	0.108	0	0	3.55747	0.897	0.191	0	0	6.31703	0.913	0.025	0	0	5.85187	0.713	0.035	0	0	2.43707	0.434	0.055	0	0	0
LY96-ENSG00000154589	0	4.99247	0.981	0.097	0	0	2.12071	0.481	0.138	0	0	7.47378	0.813	0.018	0	4.95304e-96	2.30237	0.312	0.088	8.36023e-92	1.15142e-116	2.22369	0.247	0.105	1.94347e-112	4.95304e-96	0
MAF-ENSG00000178573	0	5.25771	0.971	0.088	0	0	3.26739	0.93	0.288	0	0	4.09443	0.911	0.255	0	1.59148e-20	0.844826	0.319	0.194	2.68626e-16	1.29477e-20	0.684718	0.157	0.155	2.18544e-16	1.59148e-20	0
VSIG4-ENSG00000155659	0	6.35768	0.979	0.101	0	0	3.55128	0.785	0.132	0	0	7.82307	0.752	0.011	0	2.54049e-242	6.36638	0.198	0.005	4.2881e-238	1.0262e-122	4.51777	0.103	0.006	1.73212e-118	1.0262e-122	0
C1QB-ENSG00000173369	0	4.77715	0.985	0.112	0	0	3.21654	0.97	0.341	0	0	6.676	0.883	0.034	0	0	6.12749	0.669	0.028	0	3.86095e-302	2.78269	0.361	0.041	6.5169e-298	3.86095e-302	0
C1QA-ENSG00000173372	0	5.25088	0.998	0.14	0	0	3.31925	0.978	0.379	0	0	7.19753	0.94	0.046	0	0	6.84243	0.772	0.03	0	0	4.59586	0.431	0.031	0	0	0
MEF2C-ENSG00000081189	0	5.14452	0.905	0.048	0	0	2.75019	0.843	0.232	0	0	3.18157	0.9	0.256	0	2.19621e-33	1.62999	0.189	0.067	3.70699e-29	8.83045e-50	1.69812	0.213	0.098	1.49049e-45	2.19621e-33	0
MRC1-ENSG00000260314	0	6.66883	0.885	0.029	0	0	4.109	0.929	0.17	0	0	8.10662	0.825	0.011	0	0	6.27636	0.481	0.014	0	3.78146e-281	4.29856	0.261	0.022	6.38273e-277	3.78146e-281	0
HCST-ENSG00000126264	0	4.42051	0.945	0.103	0	0	0.914169	0.687	0.357	0	0	4.01787	0.889	0.071	0	1.54537e-268	2.56411	0.662	0.17	2.60843e-264	7.19618e-208	1.96064	0.555	0.19	1.21464e-203	7.19618e-208	0
CD163-ENSG00000177575	0	5.40139	0.896	0.055	0	0	3.52214	0.82	0.168	0	0	8.09328	0.766	0.01	0	0	5.74807	0.46	0.007	0	0	2.71168	0.338	0.03	0	0	0
LAPTM5-ENSG00000162511	0	2.86482	0.98	0.142	0	0	0.580918	0.825	0.491	0	0	4.4192	0.908	0.076	0	6.87837e-189	1.4295	0.75	0.276	1.161e-184	2.62344e-73	0.782598	0.571	0.327	4.4281e-69	2.62344e-73	0
MS4A4A-ENSG00000110079	0	4.89667	0.899	0.067	0	0	3.48351	0.784	0.141	0	0	8.02724	0.789	0.013	0	0	7.87692	0.378	0.003	0	4.10194e-221	3.99536	0.215	0.016	6.92366e-217	4.10194e-221	0
AIF1-ENSG00000204472	0	4.79291	1	0.193	0	0	1.52478	0.935	0.474	0	0	4.93395	0.997	0.261	0	0	5.47807	0.823	0.058	0	0	4.04825	0.503	0.059	0	0	0
SPI1-ENSG00000066336	0	3.7199	0.89	0.084	0	0	0.93219	0.641	0.3	0	0	4.73928	0.741	0.044	0	0	2.8966	0.648	0.099	0	2.07082e-245	1.80448	0.565	0.161	3.49534e-241	2.07082e-245	0
MS4A6A-ENSG00000110077	0	3.72698	0.872	0.068	0	0	2.54821	0.801	0.233	0	0	6.02962	0.787	0.021	0	0	6.07584	0.701	0.028	0	0	6.10984	0.457	0.014	0	0	0
CD53-ENSG00000143119	0	4.08482	0.894	0.094	0	0	1.05425	0.539	0.274	0	0	3.00561	0.624	0.072	0	1.66718e-33	0.742121	0.267	0.125	2.81403e-29	6.96761e-38	0.274906	0.37	0.236	1.17606e-33	1.66718e-33	0
ATP1B1-ENSG00000143153	0	3.91619	0.959	0.181	0	0	2.89726	0.661	0.146	0	0	3.32713	0.628	0.152	0	1.91067e-20	1.11526	0.199	0.095	3.22502e-16	7.18115e-46	1.4193	0.295	0.157	1.21211e-41	1.91067e-20	0
UCP2-ENSG00000175567	0	4.14135	0.948	0.172	0	1.03275e-253	0.856133	0.527	0.296	1.74317e-249	0	3.96566	0.75	0.072	0	2.65108e-124	2.56379	0.339	0.072	4.47475e-120	7.13964e-29	1.1143	0.221	0.112	1.2051e-24	7.13964e-29	0
FCGR2A-ENSG00000143226	0	4.85564	0.822	0.048	0	0	2.14448	0.805	0.269	0	0	5.76086	0.575	0.017	0	0	4.95246	0.663	0.051	0	0	4.78864	0.633	0.051	0	0	0
MAFB-ENSG00000204103	0	4.03697	0.894	0.127	0	0	2.64669	0.754	0.21	0	0	4.32221	0.687	0.101	0	5.03268e-242	3.04024	0.519	0.134	8.49467e-238	2.85513e-202	2.77366	0.394	0.117	4.81917e-198	2.85513e-202	0
PLEK-ENSG00000115956	0	3.88859	0.83	0.064	0	0	0.61804	0.68	0.344	0	0	4.8737	0.762	0.041	0	0	3.93055	0.458	0.051	0	0	3.99205	0.52	0.059	0	0	0
FCER1G-ENSG00000158869	0	3.90458	0.998	0.236	0	0	1.12312	0.931	0.52	0	0	4.46553	0.981	0.094	0	0	3.61495	0.783	0.084	0	0	1.28756	0.62	0.155	0	0	0
CD14-ENSG00000170458	0	6.45115	0.998	0.243	0	0	2.93236	0.957	0.369	0	0	7.45627	0.941	0.033	0	2.8745e-220	4.33168	0.287	0.02	4.85187e-216	7.71319e-47	0.526241	0.186	0.069	1.30191e-42	7.71319e-47	0
RASSF4-ENSG00000107551	0	5.01878	0.8	0.048	0	0	2.4914	0.641	0.162	0	0	4.55594	0.443	0.034	0	2.40157e-83	2.74212	0.223	0.048	4.05361e-79	8.78278e-16	0.974477	0.163	0.092	1.48245e-11	8.78278e-16	0
RNASE1-ENSG00000129538	0	5.5493	0.938	0.187	0	0	3.26601	0.983	0.471	0	0	8.4565	0.951	0.098	0	0	6.25902	0.816	0.054	0	0	2.76912	0.549	0.096	0	0	0
BLVRA-ENSG00000106605	0	4.29957	0.921	0.171	0	0	1.76251	0.335	0.119	0	0	2.89298	0.578	0.204	0	5.1924e-99	2.16452	0.348	0.117	8.76425e-95	9.24634e-08	0.219724	0.185	0.197	0.00156069	9.24634e-08	0
CD36-ENSG00000135218	0	4.38956	0.998	0.249	0	0	1.58344	0.905	0.452	0	0	6.99395	0.916	0.042	0	0	4.79076	0.421	0.029	0	2.72542e-241	4.3155	0.222	0.019	4.60023e-237	2.72542e-241	0
RENBP-ENSG00000102032	0	4.52079	0.818	0.073	0	0	2.30129	0.202	0.048	0	0	5.22927	0.42	0.02	0	8.04447e-87	3.04252	0.183	0.027	1.35783e-82	3.9713e-36	2.04158	0.109	0.034	6.70315e-32	3.9713e-36	0
ARRB2-ENSG00000141480	0	3.8693	0.907	0.164	0	3.54911e-255	0.740047	0.479	0.255	5.99054e-251	0	3.68753	0.648	0.094	0	5.68707e-123	2.01758	0.454	0.148	9.59921e-119	3.64866e-19	0.403423	0.341	0.235	6.15858e-15	3.64866e-19	0
NCF4-ENSG00000100365	0	4.56585	0.868	0.125	0	0	2.05929	0.577	0.153	0	0	6.19341	0.617	0.017	0	7.90147e-200	3.54511	0.338	0.039	1.33369e-195	5.44783e-86	2.09448	0.241	0.075	9.19538e-82	5.44783e-86	0
GAS6-ENSG00000183087	0	4.70155	0.791	0.054	0	0	1.85848	0.525	0.173	0	0	3.52492	0.653	0.165	0	2.59533e-48	2.11513	0.206	0.08	4.38066e-44	2.80094e-29	1.46047	0.123	0.084	4.72771e-25	2.80094e-29	0
LGALS9-ENSG00000168961	0	3.45981	0.825	0.089	0	1.18713e-251	1.16476	0.372	0.169	2.00376e-247	0	4.75735	0.389	0.023	0	6.2547e-85	2.6178	0.247	0.061	1.05573e-80	9.21395e-27	1.3867	0.154	0.077	1.55522e-22	9.21395e-27	0
RAB32-ENSG00000118508	0	4.30702	0.84	0.107	0	1.02905e-193	1.27649	0.268	0.114	1.73693e-189	0	2.07674	0.563	0.244	0	1.46173e-17	0.676842	0.228	0.122	2.46725e-13	8.35766e-20	0.91955	0.205	0.128	1.41069e-15	1.46173e-17	0
PPP1R18-ENSG00000146112	0	3.85076	0.89	0.164	0	2.18814e-167	0.762751	0.4	0.225	3.69335e-163	0	2.27829	0.592	0.213	0	1.74271e-49	1.06934	0.544	0.348	2.94152e-45	1.21159e-201	1.54573	0.589	0.415	2.04505e-197	1.74271e-49	0
IGSF6-ENSG00000140749	0	4.66975	0.765	0.043	0	0	1.83629	0.564	0.186	0	0	5.65357	0.492	0.015	0	2.05845e-205	4.40507	0.262	0.021	3.47446e-201	3.25679e-137	4.16743	0.137	0.013	5.49714e-133	3.25679e-137	0
TYROBP-ENSG00000011600	0	3.38999	1	0.278	0	0	1.07587	0.962	0.585	0	0	4.79155	0.999	0.093	0	0	3.14703	0.879	0.12	0	0	1.63254	0.812	0.232	0	0	0
CYBB-ENSG00000165168	0	4.4836	0.773	0.052	0	0	2.50884	0.878	0.29	0	0	7.01937	0.828	0.017	0	7.90131e-294	6.05821	0.25	0.007	1.33366e-289	9.67865e-189	4.3708	0.17	0.012	1.63366e-184	9.67865e-189	0
CD68-ENSG00000129226	0	3.57624	0.996	0.276	0	0	1.66795	0.85	0.34	0	0	6.5274	0.91	0.049	0	0	4.19077	0.769	0.17	0	0	2.81664	0.585	0.18	0	0	0
CSF1R-ENSG00000182578	0	3.8641	0.967	0.247	0	0	3.07335	0.899	0.258	0	0	6.90753	0.883	0.021	0	2.05677e-211	4.79713	0.249	0.016	3.47162e-207	2.47984e-59	2.06318	0.155	0.041	4.18572e-55	2.47984e-59	0
RNASE6-ENSG00000169413	0	4.08703	0.773	0.057	0	0	2.12171	0.382	0.106	0	0	4.88746	0.64	0.027	0	3.20201e-239	3.76245	0.37	0.039	5.40468e-235	2.20542e-73	2.27128	0.169	0.042	3.72253e-69	2.20542e-73	0
STAB1-ENSG00000010327	0	5.49991	0.753	0.046	0	0	3.40624	0.878	0.221	0	0	7.07407	0.855	0.03	0	0	6.77066	0.436	0.01	0	5.96013e-208	3.62814	0.242	0.027	1.00601e-203	5.96013e-208	0
CD4-ENSG00000010610	0	3.9644	0.759	0.063	0	0	2.01249	0.664	0.215	0	0	6.19958	0.572	0.017	0	2.95615e-176	3.37115	0.32	0.042	4.98969e-172	9.98673e-32	1.68533	0.129	0.062	1.68566e-27	9.98673e-32	0
RGS10-ENSG00000148908	0	3.97426	0.978	0.283	0	0	1.51461	0.521	0.222	0	0	2.43005	0.896	0.442	0	5.84439e-114	1.46754	0.632	0.326	9.86474e-110	1.30857e-14	0.514678	0.414	0.333	2.20873e-10	1.30857e-14	0
HCK-ENSG00000101336	0	4.30731	0.74	0.049	0	1.64813e-238	0.722184	0.349	0.161	2.78187e-234	0	5.09682	0.488	0.021	0	2.97693e-82	2.63684	0.226	0.049	5.02475e-78	6.5756e-57	1.37518	0.27	0.111	1.1099e-52	6.5756e-57	0
CCL3-ENSG00000277632	0	4.11818	0.95	0.262	0	0	2.19476	0.79	0.263	0	0	5.05072	0.963	0.144	0	1.33245e-227	3.99884	0.307	0.022	2.24904e-223	0	4.95658	0.529	0.056	0	1.33245e-227	0
FERMT3-ENSG00000149781	0	3.67397	0.747	0.066	0	3.05942e-109	0.627209	0.314	0.183	5.16399e-105	0	4.01871	0.454	0.039	0	2.68492e-113	2.65333	0.307	0.067	4.53187e-109	9.0904e-34	1.28163	0.22	0.113	1.53437e-29	9.0904e-34	0
MS4A7-ENSG00000166927	0	3.17847	0.744	0.066	0	0	2.64577	0.816	0.231	0	0	7.37723	0.696	0.013	0	3.74667e-307	4.32692	0.391	0.031	6.32401e-303	1.49696e-243	2.2779	0.481	0.117	2.52671e-239	1.49696e-243	0
DOK2-ENSG00000147443	0	4.40252	0.713	0.046	0	0	1.25829	0.393	0.16	0	0	3.86616	0.467	0.04	0	4.6803e-157	3.05195	0.346	0.063	7.89988e-153	1.33372e-212	2.87096	0.359	0.091	2.25119e-208	4.6803e-157	0
FCGRT-ENSG00000104870	0	4.11026	0.999	0.338	0	0	2.35303	0.927	0.444	0	0	2.69303	0.987	0.774	0	3.86215e-242	2.6756	0.535	0.188	6.51893e-238	7.16955e-144	1.7745	0.41	0.277	1.21015e-139	7.16955e-144	0
NCKAP1L-ENSG00000123338	0	4.55305	0.703	0.045	0	0	1.70271	0.59	0.224	0	0	4.84575	0.506	0.029	0	1.64206e-49	2.26618	0.174	0.044	2.77163e-45	0.0417982	0.396999	0.101	0.094	1	0.0417982	0
C3AR1-ENSG00000171860	0	4.28312	0.704	0.048	0	0	2.64296	0.608	0.142	0	0	5.78005	0.433	0.011	0	2.14183e-190	5.00844	0.212	0.01	3.61519e-186	6.67069e-134	3.20283	0.179	0.022	1.12595e-129	6.67069e-134	0
TTYH3-ENSG00000136295	0	3.69903	0.803	0.153	0	0	2.51461	0.346	0.086	0	0	2.55292	0.642	0.281	0	1.67515e-68	2.89927	0.169	0.038	2.82749e-64	9.08876e-22	1.40481	0.123	0.058	1.53409e-17	9.08876e-22	0
BMP2K-ENSG00000138756	0	4.09158	0.788	0.14	0	0	2.57744	0.636	0.182	0	0	4.27679	0.442	0.048	0	2.48672e-81	2.89034	0.198	0.047	4.19733e-77	8.78249e-33	1.633	0.131	0.073	1.4824e-28	8.78249e-33	0
GATM-ENSG00000171766	0	3.72009	0.695	0.052	0	0	3.04201	0.438	0.063	0	0	5.40324	0.626	0.035	0	6.90038e-59	1.87394	0.283	0.113	1.16472e-54	5.86029e-24	1.03292	0.177	0.132	9.89159e-20	5.86029e-24	0
PYCARD-ENSG00000103490	0	2.72907	0.956	0.331	0	1.81846e-210	0.728034	0.434	0.236	3.06937e-206	0	3.8973	0.821	0.14	0	2.19055e-49	1.30817	0.392	0.198	3.69743e-45	2.44955e-37	0.746367	0.166	0.174	4.1346e-33	2.44955e-37	0
KCTD12-ENSG00000178695	0	2.65653	0.91	0.29	0	0	2.48062	0.867	0.332	0	0	2.01301	0.811	0.413	0	3.90035e-39	1.69579	0.195	0.064	6.5834e-35	4.32744e-46	1.94828	0.132	0.06	7.30429e-42	3.90035e-39	0
HAVCR2-ENSG00000135077	0	3.73093	0.666	0.048	0	5.4041e-170	0.773461	0.308	0.153	9.12158e-166	0	3.65466	0.334	0.026	0	1.85577e-157	4.10607	0.223	0.024	3.13235e-153	9.10321e-84	2.59137	0.167	0.044	1.53653e-79	9.10321e-84	0
LPAR6-ENSG00000139679	0	4.16395	0.655	0.045	0	0	3.05418	0.618	0.121	0	0	3.39353	0.591	0.113	0	3.74016e-37	1.24809	0.413	0.245	6.31302e-33	6.23274e-17	0.561747	0.421	0.366	1.05202e-12	6.23274e-17	0
CD86-ENSG00000114013	0	3.91056	0.663	0.054	0	0	1.8286	0.334	0.104	0	0	4.70247	0.422	0.018	0	4.60213e-97	2.74953	0.25	0.05	7.76793e-93	5.76781e-50	1.22608	0.281	0.126	9.73549e-46	5.76781e-50	0
RNF130-ENSG00000113269	0	2.72931	0.841	0.233	0	5.92984e-261	0.963799	0.467	0.243	1.0009e-256	0	1.89241	0.631	0.326	0	1.19291e-211	2.4977	0.532	0.156	2.01352e-207	8.52133e-35	1.00647	0.287	0.201	1.43832e-30	8.52133e-35	0
CCL4-ENSG00000275302	0	4.25697	0.748	0.145	0	0	1.57491	0.834	0.338	0	0	4.18543	0.979	0.154	0	5.21254e-162	3.36744	0.288	0.032	8.79824e-158	0	4.92109	0.514	0.05	0	5.21254e-162	0
AP1S2-ENSG00000182287	0	2.8022	0.822	0.22	0	2.28148e-180	0.656854	0.431	0.246	3.8509e-176	0	1.64193	0.632	0.325	0	5.8172e-13	0.518881	0.341	0.233	9.81884e-09	5.94795e-11	0.275251	0.309	0.332	1.00395e-06	5.94795e-11	0
CYTH4-ENSG00000100055	0	4.83062	0.625	0.032	0	0	2.08402	0.674	0.202	0	0	5.33034	0.4	0.017	0	1.49292e-107	3.65398	0.183	0.02	2.5199e-103	3.19159e-18	1.36115	0.114	0.054	5.38709e-14	3.19159e-18	0
PLTP-ENSG00000100979	0	4.32052	0.975	0.387	0	0	3.3303	0.974	0.424	0	0	3.83105	0.828	0.419	0	0	4.58294	0.62	0.119	0	9.75305e-230	2.75959	0.327	0.118	1.64622e-225	9.75305e-230	0
ZEB2-ENSG00000169554	0	2.12072	0.738	0.151	0	0	1.01457	0.862	0.525	0	0	1.00732	0.675	0.52	0	1.65506e-135	2.0619	0.499	0.167	2.79358e-131	3.99206e-192	2.19316	0.494	0.193	6.7382e-188	1.65506e-135	0
CCR1-ENSG00000163823	0	2.98321	0.743	0.174	0	0	2.10055	0.541	0.137	0	0	6.40668	0.422	0.009	0	1.14355e-176	5.83254	0.162	0.004	1.9302e-172	4.65299e-105	3.31697	0.14	0.019	7.85378e-101	4.65299e-105	0
MKNK1-ENSG00000079277	0	3.01494	0.839	0.304	0	0	2.73456	0.626	0.144	0	0	3.10762	0.511	0.12	0	8.75289e-55	2.36974	0.177	0.058	1.4774e-50	2.80889e-21	1.28484	0.149	0.087	4.74113e-17	2.80889e-21	0
LILRB5-ENSG00000105609	0	6.81837	0.535	0.009	0	0	3.81392	0.599	0.061	0	0	8.39768	0.547	0.005	0	0	7.31432	0.352	0.003	0	1.26702e-197	3.35144	0.221	0.021	2.13861e-193	1.26702e-197	0
PTPN6-ENSG00000111679	0	2.64714	0.813	0.289	0	9.99153e-190	0.82696	0.409	0.222	1.68647e-185	0	4.23343	0.439	0.034	0	5.55578e-70	2.61053	0.197	0.048	9.3776e-66	7.10778e-34	1.69132	0.148	0.066	1.19972e-29	7.10778e-34	0
NR4A2-ENSG00000153234	0	3.01144	0.626	0.112	0	0	1.48434	0.675	0.362	0	0	3.30806	0.843	0.217	0	8.67896e-20	0.893085	0.359	0.236	1.46492e-15	0	2.99922	0.543	0.196	0	8.67896e-20	0
PEPD-ENSG00000124299	0	2.90743	0.88	0.367	0	2.53004e-214	1.41164	0.294	0.141	4.27045e-210	0	2.49011	0.618	0.301	0	1.24836e-49	1.66161	0.269	0.13	2.1071e-45	2.03891e-24	0.607309	0.21	0.227	3.44148e-20	2.03891e-24	0
PLEKHO1-ENSG00000023902	0	3.03554	0.593	0.087	0	0	1.70735	0.489	0.185	0	0	1.38352	0.421	0.283	0	1.33944e-168	2.89562	0.379	0.083	2.26084e-164	1.05658e-72	1.78377	0.269	0.124	1.78339e-68	1.05658e-72	0
MPEG1-ENSG00000197629	0	5.17747	0.522	0.017	0	0	2.28273	0.65	0.164	0	0	5.94374	0.604	0.017	0	6.24115e-170	6.39263	0.141	0.003	1.05344e-165	1.05829e-141	4.07381	0.138	0.01	1.7863e-137	1.05829e-141	0
MCOLN1-ENSG00000090674	0	2.7838	0.706	0.221	0	0	2.02131	0.559	0.182	0	0	3.16466	0.429	0.101	0	1.916e-57	2.12173	0.217	0.08	3.23401e-53	3.98653e-135	2.23468	0.278	0.118	6.72886e-131	1.916e-57	0
CYBA-ENSG00000051523	0	2.75109	0.999	0.517	0	0	0.726371	0.903	0.581	0	0	2.25428	0.987	0.777	0	4.60704e-167	1.72452	0.69	0.293	7.77623e-163	4.77598e-09	0.2703	0.497	0.414	8.06137e-05	4.77598e-09	0
TNFRSF1B-ENSG00000028137	0	3.16325	0.549	0.073	0	0	0.366371	0.673	0.4	0	0	4.10268	0.614	0.06	0	5.48668e-53	1.24574	0.381	0.167	9.26097e-49	2.99608e-09	0.191017	0.358	0.282	5.05708e-05	2.99608e-09	0
C4orf48-ENSG00000243449	0	2.23239	0.808	0.333	0	7.98288e-266	1.11423	0.44	0.221	1.34743e-261	0	1.81166	0.579	0.296	0	3.77737e-71	1.44812	0.386	0.145	6.37582e-67	2.75243e-05	-0.426748	0.135	0.182	0.464583	2.75243e-05	0
NPL-ENSG00000135838	0	2.80694	0.958	0.487	0	0	1.98773	0.411	0.125	0	0	6.80789	0.62	0.017	0	5.54992e-124	4.24385	0.171	0.014	9.36772e-120	3.8699e-47	2.10617	0.124	0.036	6.532e-43	3.8699e-47	0
CPEB4-ENSG00000113742	0	2.83923	0.618	0.15	0	0	2.40078	0.663	0.215	0	0	4.37473	0.512	0.062	0	5.65753e-108	2.3832	0.348	0.123	9.54935e-104	0	2.91396	0.46	0.169	0	5.65753e-108	0
TPP1-ENSG00000166340	0	2.49995	0.912	0.445	0	0	1.78114	0.738	0.32	0	0	3.73551	0.681	0.132	0	1.02002e-73	1.80194	0.347	0.15	1.72169e-69	4.36156e-29	0.890985	0.298	0.241	7.36187e-25	4.36156e-29	0
CXCL16-ENSG00000161921	0	2.17299	0.552	0.093	0	3.01657e-284	1.03557	0.391	0.173	5.09167e-280	0	4.67558	0.332	0.018	0	3.46358e-23	0.540264	0.367	0.218	5.84618e-19	4.11072e-50	0.726653	0.496	0.307	6.93849e-46	3.46358e-23	0
CTSZ-ENSG00000101160	0	3.42278	0.955	0.497	0	0	1.90011	0.883	0.412	0	0	3.28804	0.84	0.347	0	0	4.36573	0.756	0.125	0	0	2.77353	0.667	0.212	0	0	0
RGL1-ENSG00000143344	0	3.68894	0.518	0.066	0	0	3.38656	0.458	0.064	0	0	3.25212	0.485	0.11	0	0	4.59619	0.417	0.037	0	2.75355e-117	2.31526	0.261	0.091	4.64771e-113	2.75355e-117	0
MFSD1-ENSG00000118855	0	2.1809	0.815	0.372	0	0	2.09898	0.598	0.214	0	0	3.49548	0.639	0.141	0	5.13202e-211	3.02744	0.398	0.109	8.66234e-207	4.87645e-243	2.48078	0.413	0.168	8.23096e-239	5.13202e-211	0
RNASET2-ENSG00000026297	0	2.09721	0.928	0.507	0	0	1.33258	0.706	0.334	0	0	3.08191	0.869	0.297	0	2.77318e-101	1.82143	0.422	0.141	4.68085e-97	6.30848e-17	0.622588	0.278	0.182	1.06481e-12	6.30848e-17	0
SLC15A3-ENSG00000110446	0	2.89881	0.541	0.12	0	2.76086e-259	1.21486	0.353	0.153	4.66005e-255	0	4.51804	0.398	0.031	0	1.5395e-124	3.63355	0.209	0.025	2.59852e-120	2.72881e-53	1.98989	0.169	0.064	4.60595e-49	2.72881e-53	0
NRP1-ENSG00000099250	0	1.83991	0.829	0.412	0	0	2.50548	0.761	0.233	0	0	1.43995	0.598	0.405	0	2.79686e-25	1.36436	0.204	0.092	4.72082e-21	1.24161e-07	0.271669	0.14	0.152	0.00209572	1.24161e-07	0
HNMT-ENSG00000150540	0	2.27921	0.935	0.519	0	0	2.1543	0.532	0.168	0	0	3.35724	0.658	0.146	0	1.12667e-96	2.29088	0.315	0.086	1.9017e-92	2.25307e-55	1.62285	0.203	0.117	3.80296e-51	2.25307e-55	0
CD84-ENSG00000066294	0	3.45081	0.458	0.043	0	0	2.51773	0.679	0.163	0	0	5.92134	0.25	0.007	0	7.86798e-63	2.87191	0.15	0.024	1.32804e-58	2.29127e-18	1.09556	0.134	0.065	3.86743e-14	2.29127e-18	0
LCP2-ENSG00000043462	0	3.7697	0.448	0.036	0	1.11703e-203	0.738934	0.404	0.213	1.88543e-199	0	4.93193	0.485	0.03	0	3.95664e-138	2.7562	0.354	0.073	6.67842e-134	0	3.61949	0.456	0.098	0	3.95664e-138	0
CHCHD10-ENSG00000250479	0	2.76926	0.86	0.454	0	4.66362e-158	0.846955	0.374	0.208	7.87172e-154	0	2.27048	0.485	0.164	0	5.27827e-52	1.14534	0.481	0.283	8.9092e-48	9.96321e-08	0.572154	0.117	0.11	0.00168169	9.96321e-08	0
PIK3AP1-ENSG00000155629	0	4.08162	0.425	0.028	0	0	1.49365	0.343	0.126	0	0	4.69786	0.273	0.014	0	2.35517e-71	2.7065	0.162	0.024	3.9753e-67	3.93151e-57	1.87217	0.147	0.038	6.636e-53	3.93151e-57	0
ANKH-ENSG00000154122	0	2.51766	0.789	0.405	0	2.62546e-203	1.52017	0.27	0.124	4.43152e-199	0	3.60194	0.214	0.034	0	1.5487e-53	2.1325	0.2	0.055	2.61405e-49	9.88804e-24	1.48206	0.104	0.061	1.669e-19	9.88804e-24	0
GNPDA1-ENSG00000113552	0	2.16801	0.721	0.345	0	2.41265e-242	1.47761	0.299	0.129	4.07231e-238	0	2.32813	0.468	0.189	0	1.05787e-33	1.68292	0.193	0.079	1.78558e-29	1.09993e-18	1.00876	0.18	0.136	1.85658e-14	1.09993e-18	0
AP1B1-ENSG00000100280	0	1.82684	0.795	0.436	0	0	1.96096	0.525	0.177	0	0	3.97742	0.656	0.111	0	5.62457e-110	3.12557	0.221	0.058	9.49371e-106	7.00997e-10	0.933436	0.113	0.083	1.18321e-05	7.00997e-10	0
DAB2-ENSG00000153071	0	3.82522	0.997	0.646	0	0	3.17812	0.98	0.554	0	0	4.32916	0.932	0.466	0	9.3779e-301	3.2586	0.539	0.11	1.5829e-296	1.35111e-286	2.67976	0.367	0.162	2.28054e-282	1.35111e-286	0
CREG1-ENSG00000143162	0	2.96827	0.927	0.577	0	0	2.28246	0.577	0.201	0	0	5.50907	0.802	0.083	0	6.24719e-182	2.15253	0.575	0.21	1.05446e-177	6.98188e-11	0.453439	0.276	0.242	1.17847e-06	6.98188e-11	0
BLVRB-ENSG00000090013	0	3.64838	0.998	0.665	0	0	1.57023	0.68	0.316	0	0	4.53753	0.971	0.349	0	1.93891e-136	1.71439	0.607	0.308	3.27268e-132	1.36522e-245	1.86497	0.45	0.333	2.30436e-241	1.93891e-136	0
NINJ1-ENSG00000131669	0	2.81648	0.992	0.669	0	0	1.83394	0.799	0.349	0	0	3.59303	0.853	0.226	0	1.59596e-85	1.37441	0.583	0.299	2.69382e-81	5.96446e-177	1.40895	0.644	0.456	1.00674e-172	1.59596e-85	0
GNAI2-ENSG00000114353	0	1.86804	0.914	0.635	0	1.79463e-197	0.494657	0.784	0.607	3.02916e-193	0	2.00803	0.836	0.503	0	4.57231e-203	2.34594	0.557	0.21	7.71759e-199	1.30936e-19	0.632611	0.345	0.324	2.21007e-15	1.30936e-19	0
LGMN-ENSG00000100600	0	2.75314	0.982	0.754	0	0	3.06171	0.903	0.297	0	0	5.01411	0.838	0.216	0	0	3.97632	0.579	0.128	0	2.5824e-248	2.26405	0.4	0.268	4.35884e-244	2.5824e-248	0
TPM3-ENSG00000143549	0	1.70022	0.978	0.758	0	3.85845e-203	0.45647	0.808	0.627	6.51268e-199	0	1.72493	0.862	0.613	0	2.3984e-81	1.07007	0.668	0.486	4.04826e-77	7.67413e-33	0.434178	0.619	0.633	1.29532e-28	7.67413e-33	0
GLUL-ENSG00000135821	0	1.42901	0.965	0.75	0	0	0.688826	0.807	0.564	0	0	2.92033	0.891	0.444	0	1.07206e-45	1.08474	0.596	0.395	1.80953e-41	8.07448e-17	0.294695	0.509	0.429	1.36289e-12	8.07448e-17	0
ASAH1-ENSG00000104763	0	2.24881	0.971	0.766	0	0	0.892174	0.723	0.47	0	0	2.39213	0.8	0.462	0	7.33643e-64	1.48556	0.4	0.195	1.23832e-59	1.68175e-105	1.45677	0.333	0.238	2.83862e-101	7.33643e-64	0
PTMS-ENSG00000159335	0	1.56659	0.925	0.727	0	7.12779e-189	0.428894	0.632	0.429	1.2031e-184	0	1.29216	0.391	0.27	0	5.09817e-19	0.615034	0.477	0.369	8.60521e-15	2.46364e-28	0.432728	0.163	0.204	4.15838e-24	5.09817e-19	0
SNX2-ENSG00000205302	0	1.3529	0.939	0.787	0	0	1.43717	0.63	0.326	0	0	1.79514	0.713	0.441	0	6.10938e-91	1.85232	0.372	0.168	1.0312e-86	5.3746e-62	1.01495	0.318	0.278	9.07179e-58	5.3746e-62	0
CTSD-ENSG00000117984	0	1.66063	0.994	0.88	0	0	0.511605	0.858	0.566	0	0	3.28745	0.86	0.443	0	1.07458e-278	3.08829	0.514	0.159	1.81379e-274	8.92489e-122	1.61725	0.354	0.261	1.50643e-117	8.92489e-122	0
NPC2-ENSG00000119655	0	2.30141	1	0.888	0	0	1.8516	0.887	0.463	0	0	3.42079	0.99	0.641	0	0	2.07891	0.826	0.51	0	1.57929e-240	1.49728	0.605	0.582	2.66569e-236	1.57929e-240	0
IL6R-ENSG00000160712	0	3.37831	0.426	0.045	0	1.26345e-86	0.479967	0.287	0.175	2.13257e-82	0	5.37811	0.35	0.014	0	4.09481e-51	1.9074	0.241	0.106	6.91163e-47	4.80736e-37	1.26087	0.246	0.17	8.11434e-33	4.80736e-37	0
ITGAM-ENSG00000169896	0	3.91185	0.372	0.03	0	8.04413e-259	1.14316	0.322	0.13	1.35777e-254	0	5.07762	0.321	0.014	0	1.06803e-222	5.335	0.225	0.009	1.80273e-218	2.85076e-140	3.76789	0.153	0.016	4.81179e-136	2.85076e-140	0
OTUD1-ENSG00000165312	0	3.47712	0.445	0.062	0	0	2.70637	0.493	0.14	0	0	5.91915	0.522	0.03	0	1.89144e-57	2.43633	0.188	0.053	3.19256e-53	3.82808e-99	2.76893	0.18	0.052	6.46142e-95	1.89144e-57	0
TFEC-ENSG00000105967	0	3.86963	0.357	0.026	1.21616e-307	0	2.55296	0.346	0.074	0	0	6.68543	0.23	0.004	0	4.7124e-108	4.48896	0.142	0.011	7.95406e-104	9.32304e-241	3.98143	0.245	0.024	1.57364e-236	4.7124e-108	0
ADAM9-ENSG00000168615	4.46495e-307	1.75023	0.756	0.395	7.53639e-303	0	2.42085	0.525	0.159	0	0	1.60479	0.377	0.207	0	7.55289e-29	1.22884	0.264	0.15	1.27485e-24	2.21545e-30	0.98606	0.196	0.172	3.73946e-26	7.55289e-29	0
GLIPR1-ENSG00000139278	1.32936e-305	1.28996	0.782	0.264	2.24382e-301	0	1.32605	0.512	0.231	0	0	4.38692	0.675	0.045	0	6.35306e-71	1.49925	0.384	0.143	1.07233e-66	1.9112e-25	0.742702	0.347	0.222	3.22591e-21	1.9112e-25	0
CD83-ENSG00000112149	2.02837e-299	2.42682	0.478	0.072	3.42369e-295	0	1.36049	0.549	0.237	0	0	3.48244	0.828	0.218	0	2.70488e-179	1.66364	0.563	0.15	4.56557e-175	0	1.84007	0.77	0.255	0	2.70488e-179	0
GADD45B-ENSG00000099860	4.48836e-298	1.42285	0.92	0.603	7.5759e-294	0	2.17934	0.882	0.46	0	0	1.03766	0.941	0.761	0	3.75644e-48	0.996429	0.774	0.563	6.3405e-44	0	2.19943	0.836	0.531	0	3.75644e-48	0
SNX8-ENSG00000106266	1.92523e-296	2.25879	0.619	0.224	3.24959e-292	1.07821e-155	1.50819	0.18	0.068	1.81991e-151	0	1.4814	0.259	0.149	0	3.45e-103	2.43518	0.312	0.088	5.82326e-99	1.81296e-43	1.37642	0.254	0.136	3.0601e-39	1.81296e-43	0
NFKBID-ENSG00000167604	2.19106e-295	3.74767	0.383	0.043	3.6983e-291	0	1.50093	0.535	0.223	0	0	2.89757	0.611	0.134	0	7.05251e-32	1.84214	0.208	0.092	1.19039e-27	0	2.68968	0.473	0.165	7.56829e-306	7.05251e-32	0
HMOX1-ENSG00000100292	2.28285e-294	1.75377	0.896	0.511	3.85322e-290	0	1.30193	0.571	0.237	0	0	6.82399	0.763	0.038	0	2.60711e-206	1.91776	0.683	0.217	4.40055e-202	9.67119e-216	2.55238	0.566	0.292	1.6324e-211	2.60711e-206	0
SIRPA-ENSG00000198053	1.88425e-289	2.2363	0.63	0.194	3.18042e-285	0	1.77717	0.42	0.133	0	0	3.69212	0.328	0.048	0	3.2177e-26	1.08004	0.271	0.139	5.43116e-22	9.07107e-17	0.802537	0.267	0.178	1.53111e-12	9.07107e-17	0
RAP2B-ENSG00000181467	5.19103e-287	1.86271	0.742	0.34	8.76194e-283	0	1.40706	0.549	0.287	0	0	3.53193	0.62	0.137	0	8.59766e-34	1.49924	0.234	0.126	1.4512e-29	4.79623e-87	1.7183	0.315	0.173	8.09555e-83	8.59766e-34	0
CCL4L2-ENSG00000276070	1.87254e-284	3.27781	0.428	0.079	3.16066e-280	0	2.27122	0.57	0.137	0	0	5.54723	0.823	0.072	0	7.15171e-52	2.61917	0.118	0.017	1.20714e-47	0	5.90982	0.396	0.019	0	7.15171e-52	0
CCL13-ENSG00000181374	5.15281e-280	6.74924	0.234	0.006	8.69743e-276	0	3.17822	0.136	0.017	0	0	8.57051	0.141	0.002	0	0	8.25675	0.542	0.006	0	6.52901e-203	4.84243	0.151	0.006	1.10203e-198	6.52901e-203	0
MTSS1-ENSG00000170873	1.05802e-278	2.04296	0.67	0.262	1.78584e-274	0	2.94589	0.71	0.181	0	0	3.01588	0.477	0.114	0	5.30653e-80	1.60208	0.436	0.198	8.9569e-76	1.41931e-60	1.04017	0.454	0.267	2.39566e-56	1.41931e-60	0
SLC12A7-ENSG00000113504	6.40517e-276	4.84357	0.272	0.013	1.08113e-271	3.4054e-246	2.1978	0.171	0.042	5.74798e-242	0	3.33067	0.22	0.036	0	1.84996e-39	1.74073	0.234	0.106	3.12255e-35	8.66725e-49	1.66968	0.172	0.098	1.46295e-44	1.84996e-39	0
SELPLG-ENSG00000110876	5.83933e-275	3.87664	0.342	0.033	9.85621e-271	9.44494e-128	0.56298	0.321	0.182	1.59421e-123	0	3.75706	0.248	0.023	0	4.60673e-36	0.852193	0.205	0.08	7.7757e-32	3.44319e-06	-0.627653	0.108	0.128	0.0581177	3.44319e-06	0
PLEKHO2-ENSG00000241839	4.95831e-260	2.83623	0.458	0.099	8.36913e-256	1.97987e-225	1.14197	0.318	0.138	3.34182e-221	0	3.38191	0.326	0.061	0	1.90993e-73	2.9976	0.168	0.031	3.22377e-69	2.92548e-50	1.84096	0.176	0.072	4.93792e-46	2.92548e-50	0
SAMSN1-ENSG00000155307	1.0455e-248	3.02941	0.344	0.037	1.7647e-244	8.72513e-235	0.4118	0.415	0.226	1.47271e-230	0	3.17045	0.403	0.042	0	2.73329e-24	0.268276	0.333	0.211	4.61352e-20	4.37602e-43	-0.585744	0.335	0.307	7.38628e-39	2.73329e-24	0
SH2B3-ENSG00000111252	9.90439e-244	3.45651	0.346	0.042	1.67176e-239	0	1.85125	0.392	0.131	0	0	4.0897	0.417	0.045	0	1.53108e-130	3.08472	0.271	0.057	2.58432e-126	1.49708e-195	2.66878	0.343	0.099	2.52692e-191	1.53108e-130	0
CPVL-ENSG00000106066	2.91743e-239	1.23613	0.872	0.632	4.92432e-235	0	1.89984	0.568	0.203	0	0	2.37636	0.384	0.105	0	1.18832e-83	2.12519	0.219	0.04	2.00576e-79	6.67971e-33	1.72317	0.128	0.058	1.12747e-28	6.67971e-33	0
MAN1A1-ENSG00000111885	4.30493e-239	1.94494	0.642	0.213	7.26629e-235	0	1.54762	0.591	0.281	0	0	4.57797	0.656	0.101	0	2.73607e-62	2.22591	0.237	0.074	4.61822e-58	3.20704e-103	2.14451	0.245	0.113	5.41316e-99	2.73607e-62	0
LTC4S-ENSG00000213316	9.21582e-228	2.74695	0.426	0.102	1.55554e-223	0	2.82903	0.391	0.07	0	0	4.55689	0.464	0.029	0	5.5334e-83	2.8916	0.195	0.04	9.33982e-79	1.08468e-111	3.19224	0.154	0.032	1.83083e-107	5.5334e-83	0
HSPA1A-ENSG00000204389	6.00046e-217	1.8131	0.758	0.387	1.01282e-212	0	2.78547	0.941	0.498	0	0	3.88935	0.809	0.507	0	0	3.01878	0.895	0.517	0	0	3.79014	0.918	0.553	0	6.00046e-217	0
FRMD4B-ENSG00000114541	5.70747e-216	1.60826	0.698	0.376	9.63363e-212	0	2.42004	0.675	0.182	0	0	3.9375	0.427	0.049	0	7.67338e-40	1.53465	0.261	0.118	1.29519e-35	3.12329e-27	0.983121	0.125	0.114	5.2718e-23	3.12329e-27	0
RNF13-ENSG00000082996	2.0509e-202	1.08549	0.787	0.667	3.46171e-198	0	1.17842	0.525	0.291	0	0	1.60387	0.431	0.248	0	6.81328e-55	1.38943	0.373	0.189	1.15001e-50	3.40385e-36	0.68319	0.272	0.279	5.74535e-32	3.40385e-36	0
ATP6V1C1-ENSG00000155097	3.09268e-184	1.42926	0.638	0.396	5.22014e-180	1.5443e-113	0.902995	0.287	0.163	2.60663e-109	0	2.10336	0.319	0.124	0	1.33533e-55	1.71092	0.298	0.139	2.2539e-51	2.92181e-144	1.76807	0.388	0.211	4.93172e-140	1.33533e-55	0
MYO5A-ENSG00000197535	2.51839e-179	3.57158	0.244	0.024	4.25079e-175	0	2.24712	0.446	0.125	0	0	3.17047	0.151	0.024	0	4.45494e-68	2.29001	0.231	0.066	7.5195e-64	1.78648e-29	1.34308	0.143	0.1	3.0154e-25	1.78648e-29	0
RGS2-ENSG00000116741	7.00095e-179	1.18482	0.871	0.6	1.18169e-174	3.68422e-300	0.307503	0.623	0.365	6.21859e-296	0	2.58916	0.726	0.337	0	2.84459e-226	3.25043	0.511	0.153	4.80138e-222	1.40707e-218	2.43567	0.535	0.216	2.375e-214	7.00095e-179	0
AP2A2-ENSG00000183020	7.204e-162	1.32221	0.646	0.425	1.21596e-157	0	1.51015	0.48	0.2	0	0	1.66752	0.5	0.297	0	1.75834e-208	3.44015	0.364	0.073	2.96791e-204	1.67775e-50	1.27921	0.177	0.14	2.83187e-46	1.67775e-50	0
PLEKHA2-ENSG00000169499	6.80156e-156	2.08677	0.437	0.151	1.14803e-151	4.02543e-141	0.808012	0.347	0.194	6.79452e-137	0	2.22444	0.352	0.113	0	1.74743e-37	2.05306	0.154	0.044	2.94948e-33	1.10434e-27	1.42099	0.151	0.067	1.86401e-23	1.10434e-27	0
HLA-DMB-ENSG00000242574	1.96234e-153	0.705718	0.316	0.074	3.31224e-149	4.54642e-176	0.658238	0.347	0.184	7.67391e-172	0	3.87668	0.398	0.022	0	2.08348e-277	3.76516	0.417	0.058	3.51671e-273	3.17667e-109	2.39117	0.249	0.085	5.36191e-105	3.17667e-109	0
MYO9B-ENSG00000099331	6.77681e-153	1.66836	0.545	0.261	1.14386e-148	1.6376e-159	0.74142	0.46	0.284	2.7641e-155	0	2.3424	0.342	0.118	0	3.09483e-111	2.36281	0.341	0.111	5.22377e-107	4.65737e-44	1.37365	0.258	0.149	7.86118e-40	4.65737e-44	0
TNF-ENSG00000232810	9.201e-141	2.95071	0.214	0.025	1.55304e-136	0	2.47281	0.209	0.039	0	0	5.6203	0.729	0.04	0	6.35274e-53	2.53871	0.214	0.069	1.07228e-48	0	4.18556	0.358	0.067	0	6.35274e-53	0
ABCA1-ENSG00000165029	9.77326e-140	1.69181	0.525	0.235	1.64963e-135	0	2.15121	0.492	0.165	0	0	4.32365	0.624	0.097	0	2.11359e-88	1.96835	0.365	0.124	3.56753e-84	7.24059e-143	1.91037	0.445	0.172	1.22214e-138	2.11359e-88	0
GRB2-ENSG00000177885	2.93722e-135	0.891398	0.858	0.643	4.95773e-131	0	0.924076	0.664	0.413	0	0	1.94336	0.596	0.295	0	2.67644e-63	1.30549	0.484	0.287	4.51756e-59	3.94389e-38	0.733277	0.421	0.373	6.6569e-34	3.94389e-38	0
IRF8-ENSG00000140968	4.11476e-133	2.1358	0.307	0.066	6.9453e-129	2.51169e-159	0.956905	0.251	0.113	4.23947e-155	0	3.287	0.473	0.055	0	2.62013e-231	3.62393	0.38	0.044	4.42251e-227	0	4.00539	0.383	0.045	0	4.11476e-133	0
TNFAIP2-ENSG00000185215	2.34707e-125	1.638	0.458	0.167	3.96162e-121	0	1.23207	0.515	0.239	0	0	2.59323	0.426	0.129	0	1.06376e-27	1.09232	0.283	0.141	1.79551e-23	1.38511e-138	2.07888	0.397	0.158	2.33793e-134	1.06376e-27	0
NRP2-ENSG00000118257	1.8173e-124	1.01333	0.778	0.506	3.06741e-120	0	1.19055	0.659	0.316	0	0	2.57483	0.442	0.13	0	4.13568e-171	2.80642	0.422	0.102	6.98061e-167	1.45589e-228	2.23358	0.533	0.192	2.4574e-224	1.8173e-124	0
IL10RA-ENSG00000110324	5.35471e-110	1.42497	0.442	0.165	9.03821e-106	0	1.66843	0.489	0.185	0	0	4.28337	0.482	0.044	0	3.61051e-83	1.90992	0.369	0.121	6.09418e-79	2.52675e-83	1.3907	0.423	0.2	4.2649e-79	3.61051e-83	0
GNS-ENSG00000135677	4.95355e-104	1.33316	0.54	0.291	8.3611e-100	6.72277e-150	0.793807	0.394	0.23	1.13474e-145	0	2.00077	0.383	0.167	0	7.56704e-75	2.13162	0.281	0.097	1.27724e-70	2.87036e-40	1.42164	0.207	0.129	4.84488e-36	2.87036e-40	0
HSPH1-ENSG00000120694	1.78303e-93	1.2479	0.519	0.337	3.00957e-89	0	2.11035	0.707	0.296	0	0	2.8866	0.526	0.299	0	0	3.71532	0.806	0.299	0	0	4.18291	0.799	0.328	0	1.78303e-93	0
IER3-ENSG00000137331	3.0891e-90	0.614972	0.731	0.483	5.21409e-86	0	1.74203	0.86	0.492	0	0	2.72106	0.911	0.485	0	3.45939e-16	0.310652	0.649	0.512	5.8391e-12	4.50816e-90	1.07993	0.766	0.577	7.60932e-86	3.45939e-16	0
HSPA6-ENSG00000173110	1.15723e-70	3.11393	0.151	0.032	1.95329e-66	1.96944e-165	1.60347	0.171	0.057	3.32421e-161	0	5.16455	0.388	0.03	0	0	4.78903	0.672	0.101	0	0	5.65161	0.552	0.057	0	1.15723e-70	0
GNA13-ENSG00000120063	5.11847e-62	1.25486	0.397	0.232	8.63946e-58	1.6638e-55	0.33637	0.363	0.262	2.80834e-51	0	2.61189	0.388	0.108	0	1.07007e-110	1.67149	0.554	0.292	1.80616e-106	4.61099e-115	1.39535	0.543	0.313	7.78289e-111	1.6638e-55	0
RHOB-ENSG00000143878	6.9792e-60	0.657611	0.798	0.66	1.17802e-55	0	2.0336	0.737	0.301	0	0	1.74138	0.683	0.524	0	1.33488e-50	0.913632	0.657	0.427	2.25314e-46	1.87101e-148	1.81601	0.587	0.313	3.15808e-144	1.33488e-50	0
CD302-ENSG00000241399	4.33577e-55	1.55187	0.269	0.113	7.31835e-51	0	1.83659	0.474	0.166	0	0	1.91342	0.367	0.174	0	6.64196e-111	2.33703	0.34	0.086	1.1211e-106	1.15308e-47	1.8578	0.154	0.071	1.94628e-43	1.15308e-47	0
DNAJA4-ENSG00000140403	7.94711e-51	2.27963	0.147	0.045	1.34139e-46	1.42307e-198	1.77589	0.188	0.06	2.402e-194	0	3.99711	0.313	0.064	0	5.36224e-182	3.57951	0.299	0.076	9.05092e-178	0	3.99362	0.311	0.075	0	7.94711e-51	0
PLEKHB2-ENSG00000115762	1.77885e-50	0.713426	0.569	0.464	3.00253e-46	1.72464e-81	0.654865	0.353	0.237	2.91102e-77	0	2.33437	0.45	0.161	0	3.69966e-90	1.50629	0.499	0.29	6.24465e-86	8.36806e-116	1.35226	0.46	0.337	1.41245e-111	1.77885e-50	0
CXCL2-ENSG00000081041	1.0466e-42	1.10154	0.173	0.058	1.76656e-38	2.95007e-137	1.39383	0.187	0.076	4.97942e-133	0	2.72377	0.674	0.279	0	1.98625e-176	1.99558	0.645	0.215	3.35259e-172	0	3.07909	0.637	0.188	0	1.0466e-42	0
GPR137B-ENSG00000077585	2.49441e-40	0.766848	0.524	0.362	4.21032e-36	2.53167e-135	1.30812	0.206	0.093	4.27321e-131	0	2.30756	0.196	0.061	0	2.71666e-27	0.986089	0.31	0.164	4.58545e-23	1.36714e-33	1.06177	0.305	0.202	2.3076e-29	2.71666e-27	0
PLXNB2-ENSG00000196576	2.72023e-33	0.94686	0.318	0.178	4.59147e-29	2.44891e-86	0.61927	0.351	0.228	4.13351e-82	0	1.69381	0.274	0.138	0	8.21951e-57	2.1185	0.215	0.087	1.38737e-52	2.43305e-69	1.83546	0.16	0.095	4.10674e-65	2.72023e-33	0
USF2-ENSG00000105698	1.23339e-56	0.906958	0.478	0.352	2.08184e-52	6.2485e-97	0.697532	0.375	0.248	1.05468e-92	8.3714e-304	1.53868	0.265	0.141	1.41301e-299	6.66589e-33	1.75137	0.184	0.081	1.12513e-28	2.41067e-12	0.547239	0.108	0.112	4.06897e-08	2.41067e-12	4.1857e-303
DMXL2-ENSG00000104093	4.56979e-56	1.57898	0.258	0.103	7.71334e-52	1.36013e-132	0.626377	0.348	0.199	2.29577e-128	2.10486e-298	2.27288	0.181	0.058	3.55279e-294	9.95094e-122	3.64848	0.205	0.022	1.67962e-117	1.18636e-27	1.5019	0.113	0.041	2.00246e-23	1.18636e-27	1.05243e-297
WIPF1-ENSG00000115935	6.97199e-135	1.49722	0.561	0.245	1.1768e-130	2.05391e-130	0.459628	0.494	0.328	3.4668e-126	2.51317e-262	1.03587	0.419	0.292	4.24197e-258	9.09023e-34	0.485851	0.396	0.22	1.53434e-29	1.4726e-07	-0.49906	0.254	0.264	0.00248561	1.4726e-07	1.25658e-261
