# Supplementary material for: Prenatal particulate matter exposure imprints an epigenetic scar on FCER1G in fetal macrophages, reemerging in M2 macrophages to drive atopic dermatitis development
Source: Research Square preprint supplement (doi:10.21203/rs.3.rs-6318574/v1), 2025-05-07
Supplement: Supplementary file 6 [file 980a7d539e3ef2d55ac5e305.xlsx]

## Sheet: Table 1
Supplementary Table 1. Study population
	Total (N)	Mean or N	SD or %
Male	986	516	52.3
Maternal educational status	980
High school		59	6
University		709	72.3
Graduate school		212	21.6
Family history of allergic disease	976	480	49.2
ETS during pregnancy	938	568	60.6
Atopy at age 3	841	152	18.1
Atopic dermatitis	986	370	37.5
Maternal age at delivery	986	32.92	3.46
PM2.5 during entire pregnancy	986	27.47	5.64
PM2.5 during 1st trimester		28.3	8.28
PM2.5 during 2nd trimester		26.75	7.42
PM2.5 during 3rd trimester		27.48	7.12
Cord blood total IgE	596	0.63	2.62
1-y total IgE	828	46.19	80.58
3-y total IgE	772	120.95	311.77
Cord blood eosinophil count	418	352.61	235.81
1-y eosinophil count	828	265.97	196.18
3-y eosinophil count	814	223.11	164.85
