# Supplementary material for: Prenatal particulate matter exposure imprints an epigenetic scar on FCER1G in fetal macrophages, reemerging in M2 macrophages to drive atopic dermatitis development
Source: Research Square preprint supplement (doi:10.21203/rs.3.rs-6318574/v1), 2025-05-07
Supplement: Supplementary file 7 [file d1f1e276e37011dc93c15ba5.xlsx]

## Sheet: Table 5
Supplementary Table 5. Mendelian randomization results between PM2.5-induced methylation changes and AD status.
Exposure	Outcome	Adjust	Estimate	Std. Error	t value	Pr(>|t|)	N.snps	AIC	BIC	R2	R2_adjusted	RMSE	Sigma	Sargan	Sargan_p	Wu_Hausman	Wu_Hausman_p	weak_instruments	weak_instruments_p
cg05656486	AD	SEX	-6.86445	2.34151	-2.93164	0.00797163	17	35.4565	40.1687	0.264762	0.194739	0.42873	0.458332	17.065	0.252729	2.85176	0.106805	13.7413	0.000958455
cg20806175	AD	SEX	-6.80464	2.9257	-2.32582	0.0301249	16	35.4315	40.1438	0.265527	0.195577	0.428507	0.458093	14.5066	0.339158	3.94146	0.060994	5.84409	0.00876795
cg05656486	AD	SEX_PC1_PC2_PC3_PC4_PC5	-6.40849	3.15605	-2.03054	0.0592639	15	44.488	55.0905	0.293842	-0.0151016	0.420166	0.514596	10.5102	0.724013	0.0177853	0.89568	23.9213	0.0408308
cg20806175	AD	SEX_PC1_PC2_PC3_PC4_PC5	-8.26378	3.33173	-2.48033	0.024629	13	41.4078	52.0102	0.378898	0.107166	0.39405	0.482611	18.7087	0.095806	1.92653	0.185411	26.2575	0.00313384
